# Supplementary material for: Lipidome of the Brown Macroalga Undaria pinnatifida: Influence of Season and Endophytic Infection
Source: MDPI journal article supplement (doi:10.3390/md21090466), 2023-08-25
Supplement: s1 [file s1]

## Supplementary data content page

**Title: Lipidome of the Brown Macroalga *Undaria pinnatifida*: Influence of Season and Endophytic Infection**

Authors: Ksenia Chadova and Peter Velansky

Address: A.V. Zhirmunsky National Scientific Center of Marine Biology, Far Eastern Branch of Russian Academy of Sciences, Vladivostok 690041. Russia

Correspondence: [chadova\\_9595@mail.ru](mailto:chadova_9595@mail.ru)**Table S1.** The polar lipid classes content (% of the total polar lipids) and TAG (% of the total lipids) of various parts of the blades of *Undaria pinnatifida* samples uninfected and infected with the endophyte *Laminariocolax aecidioides* collected in different months. Values given as mean  $\pm$  s.d. for triplicate. "+" – amount less than 0.1%, "-" – not detected. Between columns result of Tukey test and Students t-test ( $p < 0.05$ ,  $n = 3$ ) are shown (">", "<" – statistically significant difference, "=" – no significant changes). "T" – difference between «June» and «February», "S" – difference between uninfected and infected samples.

| Lipid  | The lower part of the blades of infected <i>U. pinnatifida</i> samples |                  |                  |                  |                  |                  |               | The upper intact part of the blades of infected <i>U. pinnatifida</i> samples |                  |                  |                  |                  |                  |   | The upper part of the blades of infected <i>U. pinnatifida</i> samples with endophyte |                | The lower part of the blades of uninfected <i>U. pinnatifida</i> samples |                  |                  |                  | The upper part of the blades of uninfected <i>U. pinnatifida</i> samples |   |      |   |
|--------|------------------------------------------------------------------------|------------------|------------------|------------------|------------------|------------------|---------------|-------------------------------------------------------------------------------|------------------|------------------|------------------|------------------|------------------|---|---------------------------------------------------------------------------------------|----------------|--------------------------------------------------------------------------|------------------|------------------|------------------|--------------------------------------------------------------------------|---|------|---|
|        | Nov.                                                                   | Dec.             | Jan.             | Feb.             | Apr.             | Jun.             | T             | Nov.                                                                          | Dec.             | Jan.             | Feb.             | Apr.             | Jun.             | T | Nov.                                                                                  | Jun.           | Nov.                                                                     | S                | Jun.             | S                | Nov.                                                                     | S | Jun. | S |
| TAG    | 8.7 $\pm$ 3.7                                                          | = 6.9 $\pm$ 2.0  | = 5.9 $\pm$ 1.4  | < 14.7 $\pm$ 3.9 | = 12.5 $\pm$ 1.5 | > 4.5 $\pm$ 0.7  | <             | 9.0 $\pm$ 2.0                                                                 | = 8.5 $\pm$ 0.7  | = 9.3 $\pm$ 0.7  | < 19.7 $\pm$ 0.9 | = 17.2 $\pm$ 2.2 | > 7.9 $\pm$ 2.8  | < | 12.5 $\pm$ 2.1                                                                        | 12.5 $\pm$ 0.3 | 5.3 $\pm$ 0.1                                                            | = 8.6 $\pm$ 2.4  | = 9.7 $\pm$ 0.7  | = 6.9 $\pm$ 0.6  | =                                                                        |   |      |   |
| MGDG   | 34.1 $\pm$ 3.0                                                         | = 35.1 $\pm$ 2.7 | > 25.4 $\pm$ 1.1 | = 24.7 $\pm$ 2.6 | > 21.1 $\pm$ 1.3 | < 34.4 $\pm$ 2.2 | >             | 31.6 $\pm$ 2.1                                                                | < 45.4 $\pm$ 2.6 | > 27.7 $\pm$ 0.8 | = 26.1 $\pm$ 1.5 | = 24.5 $\pm$ 0.9 | < 30.7 $\pm$ 2.0 | > | 29.2 $\pm$ 2.5                                                                        | 31.9 $\pm$ 3.0 | 29.2 $\pm$ 0.4                                                           | = 43.2 $\pm$ 2.4 | > 29.7 $\pm$ 0.3 | = 36.7 $\pm$ 0.6 | >                                                                        |   |      |   |
| GlcADG | 0.4 $\pm$ 0.1                                                          | = 0.5 $\pm$ 0.0  | > 0.4 $\pm$ 0.1  | < 0.6 $\pm$ 0.1  | = 0.6 $\pm$ 0.1  | = 0.2 $\pm$ 0.1  | <             | 0.8 $\pm$ 0.1                                                                 | = 0.6 $\pm$ 0.0  | = 0.5 $\pm$ 0.1  | = 0.5 $\pm$ 0.0  | = 0.5 $\pm$ 0.1  | = 0.6 $\pm$ 0.3  | = | 1.0 $\pm$ 0.1                                                                         | 0.9 $\pm$ 0.2  | 0.5 $\pm$ 0.0                                                            | = 0.2 $\pm$ 0.0  | = 1.0 $\pm$ 0.2  | = 0.3 $\pm$ 0.0  | =                                                                        |   |      |   |
| SQDG   | 11.9 $\pm$ 1.0                                                         | > 3.9 $\pm$ 1.7  | < 6.2 $\pm$ 0.3  | < 10.3 $\pm$ 0.9 | = 11.4 $\pm$ 0.8 | = 12.9 $\pm$ 1.3 | >             | 11.5 $\pm$ 1.1                                                                | > 1.0 $\pm$ 0.3  | < 5.9 $\pm$ 0.1  | < 9.1 $\pm$ 0.5  | = 9.0 $\pm$ 1.0  | < 13.1 $\pm$ 0.7 | > | 11.8 $\pm$ 0.3                                                                        | 13.5 $\pm$ 1.8 | 12.5 $\pm$ 0.9                                                           | = 8.0 $\pm$ 4.3  | = 13.3 $\pm$ 0.3 | = 11.2 $\pm$ 0.8 | =                                                                        |   |      |   |
| DGDG   | 9.9 $\pm$ 0.0                                                          | < 18.7 $\pm$ 2.0 | > 13.9 $\pm$ 0.9 | = 12.4 $\pm$ 2.0 | = 13.0 $\pm$ 1.0 | > 8.5 $\pm$ 1.3  | <             | 13.9 $\pm$ 0.9                                                                | > 7.2 $\pm$ 2.5  | < 20.9 $\pm$ 0.6 | = 22.5 $\pm$ 2.0 | = 23.0 $\pm$ 3.2 | > 12.9 $\pm$ 2.5 | < | 14.8 $\pm$ 1.2                                                                        | 11.3 $\pm$ 2.5 | 10.0 $\pm$ 0.2                                                           | = 6.8 $\pm$ 0.9  | = 14.1 $\pm$ 0.4 | = 13.6 $\pm$ 0.1 | =                                                                        |   |      |   |
| PG     | 16.0 $\pm$ 1.2                                                         | < 19.1 $\pm$ 0.5 | > 17.2 $\pm$ 0.6 | > 14.8 $\pm$ 0.9 | = 15.6 $\pm$ 1.3 | > 13.7 $\pm$ 0.7 | =             | 14.8 $\pm$ 1.8                                                                | = 12.3 $\pm$ 2.9 | < 19.4 $\pm$ 1.3 | > 13.7 $\pm$ 1.2 | = 14.6 $\pm$ 1.1 | > 12.2 $\pm$ 1.6 | = | 16.0 $\pm$ 0.7                                                                        | 13.2 $\pm$ 1.9 | 17.5 $\pm$ 0.5                                                           | = 13.1 $\pm$ 3.4 | = 13.3 $\pm$ 0.4 | = 13.0 $\pm$ 1.3 | =                                                                        |   |      |   |
| PG-OH  | 0.3 $\pm$ 0.0                                                          | < 0.5 $\pm$ 0.0  | = 0.5 $\pm$ 0.1  | = 0.5 $\pm$ 0.1  | > 0.3 $\pm$ 0.0  | > 0.1 $\pm$ 0.0  | <             | 0.3 $\pm$ 0.0                                                                 | > 0.2 $\pm$ 0.1  | < 0.7 $\pm$ 0.1  | > 0.4 $\pm$ 0.1  | = 0.4 $\pm$ 0.1  | > 0.1 $\pm$ 0.1  | < | 0.2 $\pm$ 0.1                                                                         | 0.1 $\pm$ 0.1  | 0.3 $\pm$ 0.0                                                            | = 0.1 $\pm$ 0.0  | = 0.3 $\pm$ 0.1  | = 0.2 $\pm$ 0.1  | =                                                                        |   |      |   |
| PI     | 2.2 $\pm$ 0.6                                                          | > 1.0 $\pm$ 0.3  | < 5.4 $\pm$ 0.3  | > 4.7 $\pm$ 0.2  | > 2.9 $\pm$ 0.3  | = 2.5 $\pm$ 0.7  | <             | 2.0 $\pm$ 0.5                                                                 | > 0.5 $\pm$ 0.3  | < 3.1 $\pm$ 0.8  | = 3.2 $\pm$ 0.8  | = 2.4 $\pm$ 0.9  | > 2.0 $\pm$ 0.1  | < | 2.0 $\pm$ 0.2                                                                         | 1.7 $\pm$ 0.4  | 2.9 $\pm$ 0.2                                                            | = 1.2 $\pm$ 0.6  | = 2.3 $\pm$ 0.4  | = 1.8 $\pm$ 0.3  | =                                                                        |   |      |   |
| CPI    | 0.6 $\pm$ 0.1                                                          | > 0.1 $\pm$ 0.0  | < 0.5 $\pm$ 0.3  | = 0.4 $\pm$ 0.1  | > 0.2 $\pm$ 0.1  | < 0.5 $\pm$ 0.2  | =             | 0.4 $\pm$ 0.1                                                                 | > 0.1 $\pm$ 0.0  | < 0.3 $\pm$ 0.1  | = 0.3 $\pm$ 0.0  | > 0.2 $\pm$ 0.1  | < 0.5 $\pm$ 0.1  | > | 0.4 $\pm$ 0.1                                                                         | 0.5 $\pm$ 0.2  | 0.8 $\pm$ 0.1                                                            | > 0.3 $\pm$ 0.1  | = 0.7 $\pm$ 0.0  | > 0.5 $\pm$ 0.2  | =                                                                        |   |      |   |
| PE     | 8.5 $\pm$ 1.0                                                          | = 8.5 $\pm$ 0.9  | < 10.9 $\pm$ 1.0 | < 13.7 $\pm$ 1.3 | < 15.3 $\pm$ 1.0 | > 9.1 $\pm$ 0.8  | <             | 9.0 $\pm$ 0.8                                                                 | < 15.4 $\pm$ 0.3 | > 7.7 $\pm$ 0.4  | < 9.2 $\pm$ 0.6  | < 11.0 $\pm$ 1.3 | = 10.0 $\pm$ 0.2 | > | 8.7 $\pm$ 0.9                                                                         | 9.5 $\pm$ 0.6  | 9.0 $\pm$ 0.9                                                            | = 9.1 $\pm$ 3.7  | = 9.8 $\pm$ 0.6  | = 8.2 $\pm$ 1.4  | =                                                                        |   |      |   |
| DGTS   | +                                                                      | =                | +                | =                | +                | =                | +             | +                                                                             | =                | +                | =                | +                | =                | + | +                                                                                     | 0.1 $\pm$ 0.0  | +                                                                        | =                | +                | =                | +                                                                        | > | +    | = |
| DGTA   | +                                                                      | =                | +                | =                | -                | =                | 0.1 $\pm$ 0.0 | =                                                                             | -                | =                | -                | =                | 0.1 $\pm$ 0.1    | = | -                                                                                     | =              | +                                                                        | =                | 0.6 $\pm$ 0.0    | =                | +                                                                        | = |      |   |
| PHEG   | 1.9 $\pm$ 0.1                                                          | > 1.1 $\pm$ 0.1  | < 1.7 $\pm$ 0.1  | < 2.1 $\pm$ 0.3  | = 2.3 $\pm$ 0.2  | = 1.9 $\pm$ 0.4  | =             | 1.7 $\pm$ 0.1                                                                 | = 1.7 $\pm$ 0.4  | > 1.2 $\pm$ 0.1  | < 1.5 $\pm$ 0.1  | = 1.4 $\pm$ 0.2  | = 1.3 $\pm$ 0.6  | = | 1.7 $\pm$ 0.3                                                                         | 1.8 $\pm$ 0.2  | 2.1 $\pm$ 0.3                                                            | = 1.8 $\pm$ 0.3  | = 1.9 $\pm$ 0.1  | = 1.4 $\pm$ 0.2  | =                                                                        |   |      |   |
| PC     | 14.2 $\pm$ 1.4                                                         | > 11.3 $\pm$ 1.4 | < 18.0 $\pm$ 0.6 | = 16.0 $\pm$ 1.8 | = 17.2 $\pm$ 0.8 | > 16.0 $\pm$ 0.6 | =             | 13.9 $\pm$ 1.2                                                                | = 15.5 $\pm$ 1.4 | > 12.7 $\pm$ 1.4 | = 13.5 $\pm$ 0.4 | = 12.9 $\pm$ 2.2 | < 16.6 $\pm$ 1.5 | > | 14.1 $\pm$ 0.7                                                                        | 15.2 $\pm$ 0.9 | 15.2 $\pm$ 1.2                                                           | = 16.0 $\pm$ 0.8 | = 12.8 $\pm$ 0.0 | = 13.0 $\pm$ 1.0 | <                                                                        |   |      |   |

**Table S2.** The fatty acids composition of various parts of the blades of *Undaria pinnatifida* samples uninfected (L and U) and infected with the endophyte *Laminariocolax aecidioides* (Li, Ui and Ue) collected in June. Values given as % of total fatty acids of the fraction (mean  $\pm$  s.d. for triplicate). "+" – amount less than 0.1%, "-" – not detected. Between columns result of Students t-test ( $p < 0.05$ ,  $n = 3$ ) are shown (">", "<" – statistically significant difference, "=" – no significant changes).

| FA               | Polar lipids fraction |                 |               |                 |                 | Neutral lipids fraction |                  |               |                 |                 |
|------------------|-----------------------|-----------------|---------------|-----------------|-----------------|-------------------------|------------------|---------------|-----------------|-----------------|
|                  | L                     | Li              | U             | Ui              | Ue              | L                       | Li               | U             | Ui              | Ue              |
| 12:0             | 0.3 $\pm$ 0.0         | > +             | 0.1 $\pm$ 0.0 | = 0.1 $\pm$ 0.1 | = 0.2 $\pm$ 0.1 | 0.9 $\pm$ 0.9           | = 1.8 $\pm$ 0.5  | 1.3 $\pm$ 0.3 | = 1.5 $\pm$ 0.5 | = 1.6 $\pm$ 0.0 |
| 14:0             | 3.6 $\pm$ 0.4         | = 3.9 $\pm$ 0.2 | 3.1 $\pm$ 0.1 | = 3.8 $\pm$ 0.9 | = 4.5 $\pm$ 0.5 | 7.2 $\pm$ 0.3           | < 10.2 $\pm$ 0.8 | 8.8 $\pm$ 1.6 | = 9.4 $\pm$ 1.1 | > 7.3 $\pm$ 0.3 |
| 14:1 $\omega$ -7 | 0.4 $\pm$ 0.0         | > +             | 0.2 $\pm$ 0.0 | = 0.2 $\pm$ 0.2 | = 0.2 $\pm$ 0.0 | 2.2 $\pm$ 0.4           | > -              | 0.4 $\pm$ 0.1 | > -             | < +             |

|                     |          |   |          |          |   |          |   |          |          |   |          |          |   |          |   |          |
|---------------------|----------|---|----------|----------|---|----------|---|----------|----------|---|----------|----------|---|----------|---|----------|
| 14:1ω-5             | -        | < | +        | -        | < | +        | = | +        | -        | = | -        | =        | - | =        | - |          |
| i-15:0              | 0.1±0.0  | = | +        | +        | = | +        | < | 0.2±0.1  | 0.6±0.1  | = | 0.5±0.0  | 0.5±0.2  | = | 0.5±0.2  | = | 1.4±0.9  |
| ai-15:0             | 0.2±0.0  | < | +        | 0.1±0.0  | = | 0.1±0.0  | = | 0.1±0.0  | 0.9±0.1  | = | 1.0±0.1  | 0.8±0.5  | = | 1.1±0.9  | = | 1.5±0.0  |
| 15:0                | 0.6±0.3  | = | 0.2±0.0  | 0.4±0.1  | = | 0.5±0.3  | = | 0.6±0.1  | +        | < | 2.3±0.9  | +        | < | 1.7±0.5  | > | +        |
| 15:1ω-7             | +        | = | +        | +        | = | +        | = | 0.1±0.0  | 0.6±0.0  | > | 0.3±0.0  | -        | < | 0.7±0.2  | = | 0.5±0.0  |
| i-16:0              | 0.3±0.0  | > | +        | 0.2±0.0  | = | 0.7±0.6  | = | 0.2±0.0  | -        | = | -        | -        | = | -        | < | 0.6±0.0  |
| 16:0                | 19.3±3.1 | = | 17.8±1.9 | 18.1±2.0 | = | 16.3±1.0 | < | 19.3±1.4 | 22.0±1.2 | = | 23.1±0.5 | 20.5±3.1 | < | 26.3±2.0 | < | 30.2±4.3 |
| 16:1ω-9             | 1.4±0.0  | > | 0.1±0.0  | 0.8±0.0  | = | 0.6±0.5  | = | 0.8±0.1  | 0.2±0.3  | = | 1.2±0.1  | 1.0±0.2  | = | 0.8±0.0  | = | 1.4±0.7  |
| 16:1ω-7             | 0.5±0.1  | = | 0.3±0.0  | 0.4±0.1  | = | 0.5±0.0  | = | 0.6±0.2  | 1.2±0.3  | = | 1.0±0.1  | 1.0±0.1  | = | 1.3±0.6  | = | 2.7±0.8  |
| 16:1ω-5             | +        | < | 0.1±0.0  | -        | < | 0.1±0.1  | = | 0.1±0.0  | -        | < | +        | -        | = | -        | < | 0.2±0.2  |
| trans-16:1Δ3        | 0.4±0.2  | = | 1.0±0.3  | 0.4±0.1  | < | 1.5±0.5  | = | 1.9±0.2  | 0.1±0.1  | = | 0.3±0.0  | 0.2±0.1  | = | 0.3±0.3  | = | 1.5±0.9  |
| ai-17:0             | 0.1±0.0  | = | +        | 0.1±0.0  | = | +        | = | 0.1±0.0  | 0.3±0.2  | = | 1.9±0.8  | 0.2±0.2  | < | 1.4±0.0  | = | 1.7±1.5  |
| 16:2ω-4             | -        | = | -        | +        | = | +        | = | +        | 0.7±0.5  | = | +        | 0.6±0.5  | = | 0.1±0.0  | < | 0.3±0.0  |
| 17:0                | 0.2±0.0  | = | 0.1±0.0  | 0.1±0.0  | = | 0.2±0.1  | = | 0.2±0.0  | 0.8±0.1  | = | 0.9±0.1  | 0.7±0.1  | = | 1.1±0.4  | = | 0.6±0.1  |
| 17:1ω-9             | 0.2±0.0  | > | +        | 0.1±0.0  | = | 0.1±0.0  | = | 0.2±0.0  | 1.5±0.1  | = | 1.2±0.2  | 1.2±0.3  | = | 1.6±1.2  | = | 0.6±0.0  |
| 16:3ω-3             | 0.1±0.0  | > | -        | +        | = | 0.1±0.0  | = | 0.1±0.0  | 0.3±0.4  | = | 0.9±0.0  | 0.3±0.3  | = | 0.1±0.0  | > | -        |
| 17:1ω-5             | 0.1±0.0  | = | +        | 0.1±0.0  | = | 0.1±0.0  | = | 0.1±0.1  | -        | > | 1.3±0.0  | -        | < | 0.6±0.7  | > | -        |
| i-18:0              | 0.2±0.0  | > | +        | 0.1±0.0  | = | 0.1±0.0  | = | 0.1±0.0  | 1.1±0.2  | = | 1.3±0.1  | 0.6±0.0  | = | 1.9±1.1  | = | 2.8±0.0  |
| 17:2ω-6             | +        | > | -        | +        | = | +        | = | +        | 0.4±0.2  | = | 0.3±0.1  | 0.4±0.0  | = | 0.3±0.1  | = | 1.4±1.3  |
| 16:4ω-1             | -        | < | +        | -        | < | +        | = | +        | -        | < | 0.1±0.0  | -        | < | 0.1±0.0  | > | -        |
| 18:0                | 1.6±0.2  | = | 1.5±0.1  | 1.2±0.1  | < | 1.8±0.2  | = | 2.0±0.4  | 4.6±0.6  | = | 4.4±0.1  | 4.1±0.4  | < | 5.8±0.2  | > | 3.7±1.4  |
| 18:1ω-9             | 8.0±1.5  | = | 9.2±1.2  | 7.7±0.3  | > | 5.3±0.6  | = | 6.7±0.8  | 10.6±0.7 | = | 14.6±0.2 | 9.8±1.9  | < | 14.0±0.3 | < | 15.4±1.0 |
| 18:1ω-7             | 0.1±0.0  | > | +        | 0.1±0.1  | = | 0.2±0.1  | = | 0.3±0.1  | 0.3±0.2  | = | 0.6±0.3  | 0.2±0.0  | = | 0.5±0.2  | = | 2.6±2.3  |
| 18:1ω-6/<br>18:1ω-5 | -        | < | +        | -        | = | -        | = | -        | -        | = | -        | -        | = | -        | = | -        |
| 18:2ω-6             | 7.0±0.3  | = | 7.2±0.6  | 6.9±0.0  | = | 6.5±0.8  | = | 6.4±0.6  | 7.4±0.5  | = | 7.9±0.6  | 7.9±1.1  | = | 6.5±0.8  | = | 5.6±0.4  |
| 19:0                | +        | > | -        | -        | < | +        | = | +        | 0.1±0.0  | = | 0.1±0.0  | 0.1±0.0  | = | 0.1±0.1  | < | 0.5±0.0  |
| 18:3ω-6             | 1.3±0.4  | = | 2.0±0.4  | 1.2±0.1  | < | 0.6±0.3  | = | 0.6±0.1  | 1.8±0.1  | = | 1.3±0.3  | 1.8±0.1  | > | 0.5±0.0  | = | 0.5±0.0  |
| Σ 19:1              | -        | = | -        | -        | = | -        | = | -        | -        | = | -        | -        | = | -        | = | -        |
| 18:3ω-3             | 10.4±1.7 | = | 8.7±1.8  | 11.2±0.5 | = | 10.9±0.4 | = | 9.6±1.4  | 5.6±0.4  | > | 2.7±0.2  | 6.7±0.9  | > | 4.1±0.9  | > | 1.6±1.4  |
| i-20:0              | -        | < | +        | -        | = | 0.1±0.0  | = | 0.1±0.0  | -        | = | -        | -        | = | -        | < | 0.1±0.0  |
| 18:4ω-3             | 16.5±0.2 | = | 18.0±5.1 | 20.2±1.2 | < | 14.2±1.8 | = | 10.6±1.2 | 4.7±0.3  | = | 3.5±1.2  | 5.3±0.7  | = | 4.4±2.8  | = | 3.2±3.5  |
| 18:4ω-1             | -        | < | +        | -        | < | +        | = | +        | -        | = | -        | -        | = | -        | = | -        |
| 18:5ω-3             | -        | < | +        | -        | = | +        | = | +        | -        | = | -        | +        | > | -        | = | -        |
| 20:0                | 0.4±0.1  | = | 0.5±0.1  | 0.4±0.1  | = | 0.9±0.4  | = | 0.9±0.1  | 0.7±0.0  | = | 0.8±0.1  | 0.7±0.1  | = | 0.9±0.3  | = | 1.5±1.4  |
| 20:1ω-9             | -        | < | +        | -        | < | +        | < | 0.1±0.0  | -        | < | 0.3±0.0  | -        | < | 0.5±0.0  | > | 0.2±0.0  |
| 20:2ω-6             | 0.1±0.1  | = | 0.1±0.0  | 0.1±0.0  | = | 0.1±0.1  | = | 0.1±0.0  | 1.4±1.2  | = | 0.6±0.4  | 1.5±1.2  | = | 0.4±0.3  | = | -        |
| 20:3ω-9             | -        | = | -        | -        | < | 0.1±0.0  | = | 0.2±0.1  | -        | < | 0.4±0.0  | -        | < | 0.4±0.1  | = | 0.5±0.0  |
| 20:3ω-6             | 0.8±0.5  | = | 1.1±0.3  | 0.6±0.0  | = | 0.8±0.4  | = | 0.9±0.1  | 0.9±0.1  | = | 1.0±0.0  | 0.9±0.1  | = | 0.4±0.1  | > | -        |
| 20:4ω-6             | 17.5±3.7 | = | 17.6±3.5 | 17.4±2.2 | = | 19.6±0.1 | = | 17.5±1.8 | 10.4±0.5 | > | 7.8±0.9  | 11.6±2.1 | > | 5.3±1.7  | > | 2.2±0.7  |
| 21:1ω-7             | -        | < | +        | -        | < | +        | = | +        | -        | = | -        | -        | = | -        | < | 0.9±0.0  |
| 20:3ω-3             | 0.1±0.0  | = | 0.1±0.0  | 0.1±0.0  | = | 0.1±0.1  | = | 0.1±0.0  | -        | = | -        | -        | = | -        | = | -        |
| i-22:0              | -        | = | -        | -        | < | +        | = | 0.1±0.0  | -        | = | -        | -        | < | +        | = | +        |

|         |          |   |          |          |   |          |   |          |          |   |          |          |   |          |   |           |
|---------|----------|---|----------|----------|---|----------|---|----------|----------|---|----------|----------|---|----------|---|-----------|
| 20:4ω-3 | 1.5±0.4  | > | 0.7±0.1  | 0.9±0.4  | = | 1.7±0.8  | = | 2.6±1.0  | 0.9±0.1  | = | 1.1±0.8  | 1.1±0.3  | = | 0.9±0.4  | = | 2.0±2.4   |
| 20:5ω-3 | 6.6±0.1  | < | 9.3±1.6  | 7.6±0.4  | < | 13.5±1.1 | = | 12.0±1.2 | 7.7±0.1  | > | 4.3±0.7  | 8.8±1.6  | > | 4.7±2.3  | = | 2.3±1.9   |
| SFA     | 26.0±2.0 | = | 24.1±2.2 | 23.4±1.7 | = | 23.3±1.8 | = | 27.7±2.0 | 37.8±3.6 | = | 43.5±2.7 | 36.9±6.1 | = | 46.6±2.3 | = | 46.9±7.3  |
| MUFA    | 9.7±1.3  | = | 10.7±1.0 | 9.0±0.3  | = | 7.8±1.1  | = | 9.8±0.9  | 16.2±0.4 | = | 18.5±1.0 | 12.7±3.0 | < | 19.0±3.0 | = | 22.6±2.2  |
| PUFA    | 61.9±3.2 | = | 64.8±1.8 | 66.2±2.2 | = | 67.4±2.9 | > | 60.8±2.9 | 42.4±4.0 | > | 31.4±2.7 | 46.9±7.5 | > | 28.1±8.8 | = | 19.2±11.5 |
| ω-3     | 35.1±1.1 | = | 36.8±6.0 | 39.9±0.1 | = | 39.9±2.7 | = | 34.9±1.0 | 19.2±1.2 | > | 12.1±3.1 | 22.2±2.9 | > | 14.2±6.5 | = | 9.2±9.2   |
| ω-6     | 19.7±4.6 | = | 20.7±3.7 | 19.3±2.4 | = | 20.8±0.7 | = | 19.2±1.9 | 14.6±1.7 | > | 10.7±0.2 | 15.9±3.3 | > | 6.6±1.6  | = | 2.7±0.6   |

**Table S3.** The molecular species composition of MGDG, DGDG, SQDG, PG, PE, PC, PI, PHEG and TAG of various parts of the blades of *Undaria pinnatifida* samples uninfected and infected with the endophyte *Laminariocolax aecidioides* collected in different months. Values given as % of total molecular species (mean ± s.d. for triplicate). “+” – amount less than 0.1%, “-” – not detected. Between columns result of Tukey test and Students t-test (p<0.05, n=3) are shown (“>”, “<” – statistically significant difference, “=” – no significant changes). “T” – difference between «June» and «February», «S» – difference between uninfected and infected samples.

| MGDG       | The lower part of the blades of infected <i>U. pinnatifida</i> samples |      |         |      |         |      |         | The upper intact part of the blades of infected <i>U. pinnatifida</i> samples |         |      |         |      |         |   | The upper part of the blades of infected <i>U. pinnatifida</i> samples with endophyte |      | The lower part of the blades of uninfected <i>U. pinnatifida</i> samples |         | The upper part of the blades of uninfected <i>U. pinnatifida</i> samples |         |         |         |         |         |         |         |   |   |
|------------|------------------------------------------------------------------------|------|---------|------|---------|------|---------|-------------------------------------------------------------------------------|---------|------|---------|------|---------|---|---------------------------------------------------------------------------------------|------|--------------------------------------------------------------------------|---------|--------------------------------------------------------------------------|---------|---------|---------|---------|---------|---------|---------|---|---|
|            | Nov.                                                                   | Dec. | Jan.    | Feb. | Apr.    | Jun. | T       | Nov.                                                                          | Dec.    | Jan. | Feb.    | Apr. | Jun.    | T | Nov.                                                                                  | Jun. | Nov.                                                                     | S       | Jun.                                                                     | S       | Nov.    | S       | Jun.    | S       |         |         |   |   |
| 14:0/16:4  | +                                                                      | =    | +       | =    | +       | =    | +       | =                                                                             | +       | =    | +       | =    | +       | = | +                                                                                     | =    | 0.1±0.1                                                                  | 0.1±0.0 | +                                                                        | =       | +       | =       | 0.2±0.0 | >       | +       | =       |   |   |
| 16:3/14:0  | +                                                                      | =    | +       | =    | +       | =    | +       | <                                                                             | +       | =    | +       | =    | +       | = | +                                                                                     | =    | +                                                                        | +       | +                                                                        | =       | +       | =       | 0.1±0.0 | =       | +       | =       |   |   |
| 14:0/16:2  | +                                                                      | =    | +       | =    | +       | =    | +       | =                                                                             | +       | =    | +       | =    | +       | = | +                                                                                     | =    | +                                                                        | +       | +                                                                        | =       | -       | =       | +       | =       | -       | =       |   |   |
| 14:0/16:2  | +                                                                      | =    | +       | =    | +       | =    | +       | =                                                                             | +       | =    | +       | =    | +       | = | +                                                                                     | =    | +                                                                        | +       | +                                                                        | =       | -       | =       | +       | =       | +       | =       |   |   |
| 14:0/16:1  | 0.1±0.0                                                                | =    | 0.1±0.0 | =    | 0.1±0.0 | <    | 0.1±0.0 | =                                                                             | 0.1±0.0 | =    | 0.1±0.0 | =    | 0.1±0.0 | < | 0.1±0.1                                                                               | =    | 0.1±0.0                                                                  | 0.1±0.0 | 0.1±0.0                                                                  | >       | +       | =       | 0.4±0.0 | >       | +       | =       |   |   |
| 14:0/16:0  | +                                                                      | =    | +       | =    | +       | =    | +       | =                                                                             | +       | <    | 0.1±0.0 | >    | +       | = | +                                                                                     | +    | +                                                                        | 0.1±0.1 | 0.1±0.0                                                                  | 0.1±0.0 | >       | 0.1±0.0 | =       | +       | =       | +       | = |   |
| 16:4/16:4  | +                                                                      | =    | +       | =    | +       | =    | +       | =                                                                             | +       | <    | +       | =    | +       | = | +                                                                                     | =    | 0.1±0.1                                                                  | 0.4±0.3 | >                                                                        | +       | =       | +       | =       | +       | =       | 0.1±0.1 | = |   |
| 16:3/16:4  | +                                                                      | =    | 0.1±0.1 | =    | +       | =    | 0.1±0.1 | =                                                                             | +       | >    | +       | =    | +       | = | +                                                                                     | =    | 0.1±0.2                                                                  | 0.1±0.0 | 0.1±0.1                                                                  | 0.1±0.1 | +       | =       | 0.6±0.0 | >       | +       | =       |   |   |
| 16:3/16:3  | +                                                                      | =    | 0.1±0.1 | =    | +       | <    | 0.1±0.0 | >                                                                             | +       | =    | +       | <    | +       | = | +                                                                                     | =    | 0.2±0.1                                                                  | 0.3±0.1 | >                                                                        | +       | =       | 0.1±0.1 | =       | 0.5±0.1 | >       | +       | = |   |
| 16:2/16:4  | +                                                                      | =    | +       | =    | +       | >    | -       | <                                                                             | +       | =    | +       | =    | +       | = | +                                                                                     | =    | 0.1±0.1                                                                  | 0.3±0.1 | >                                                                        | +       | =       | 0.1±0.1 | =       | 0.4±0.1 | =       | +       | = |   |
| 18:4/14:1+ | 0.1±0.0                                                                | =    | 0.1±0.0 | >    | +       | =    | +       | =                                                                             | +       | =    | +       | =    | +       | = | +                                                                                     | =    | +                                                                        | <       | 0.1±0.1                                                                  | >       | +       | =       | +       | =       | +       | =       |   |   |
| 16:2/16:3  | 0.1±0.0                                                                | =    | 0.1±0.0 | >    | +       | =    | +       | =                                                                             | +       | =    | +       | =    | +       | = | +                                                                                     | =    | +                                                                        | 0.1±0.1 | 0.1±0.0                                                                  | 0.1±0.0 | 0.1±0.0 | 0.1±0.0 | 0.1±0.0 | 0.3±0.0 | >       | +       | = |   |
| 16:1/16:4+ | 0.1±0.0                                                                | <    | 0.1±0.0 | =    | 0.2±0.1 | >    | 0.1±0.0 | =                                                                             | 0.1±0.0 | >    | +       | =    | +       | = | +                                                                                     | =    | 0.1±0.1                                                                  | 0.1±0.0 | 0.1±0.0                                                                  | 0.1±0.0 | 0.1±0.0 | 0.1±0.0 | 0.1±0.0 | 0.3±0.0 | >       | +       | = |   |
| 14:1/18:4  | +                                                                      | =    | +       | =    | +       | =    | +       | =                                                                             | +       | =    | +       | =    | +       | = | +                                                                                     | =    | +                                                                        | +       | +                                                                        | =       | +       | =       | 0.1±0.0 | =       | +       | =       |   |   |
| 18:3/14:1  | +                                                                      | =    | +       | =    | +       | =    | +       | =                                                                             | +       | =    | +       | =    | +       | = | +                                                                                     | =    | +                                                                        | +       | +                                                                        | =       | +       | =       | 0.1±0.0 | =       | +       | =       |   |   |
| 16:2/16:2  | +                                                                      | =    | +       | =    | +       | =    | +       | =                                                                             | +       | =    | +       | =    | +       | = | +                                                                                     | =    | +                                                                        | +       | +                                                                        | =       | +       | =       | 0.1±0.0 | =       | +       | <       |   |   |
| 16:1/16:3  | +                                                                      | >    | -       | <    | +       | =    | +       | =                                                                             | +       | >    | -       | =    | +       | = | +                                                                                     | =    | +                                                                        | +       | +                                                                        | =       | -       | =       | -       | =       | +       | =       |   |   |
| 14:0/18:4  | 1.7±0.2                                                                | >    | 1.1±0.1 | =    | 1.4±0.3 | =    | 0.9±0.5 | =                                                                             | 1.2±0.2 | =    | 1.0±0.6 | =    | 1.0±0.1 | > | 0.4±0.1                                                                               | =    | 0.3±0.1                                                                  | >       | 0.1±0.1                                                                  | <       | 0.2±0.0 | =       | 0.3±0.2 | =       | 0.7±0.1 | 0.5±0.1 |   |   |
| 16:0/16:4  | +                                                                      | =    | +       | =    | +       | >    | +       | =                                                                             | +       | <    | +       | =    | +       | = | +                                                                                     | =    | +                                                                        | 0.1±0.0 | 0.1±0.0                                                                  | +       | =       | +       | =       | 0.1±0.0 | =       | -       | = |   |
| 16:2/16:1  | +                                                                      | =    | +       | =    | +       | =    | +       | =                                                                             | +       | =    | +       | =    | +       | = | +                                                                                     | =    | +                                                                        | +       | +                                                                        | =       | -       | =       | +       | =       | -       | =       |   |   |
| 16:1/16:2  | +                                                                      | =    | +       | >    | +       | =    | +       | =                                                                             | +       | =    | +       | =    | +       | = | +                                                                                     | =    | +                                                                        | +       | +                                                                        | =       | +       | =       | 0.1±0.0 | >       | +       | =       |   |   |
| 14:0/18:3  | 3.1±0.4                                                                | >    | 2.4±0.2 | =    | 2.4±0.5 | =    | 1.9±1.0 | <                                                                             | 3.3±0.3 | >    | 1.2±0.2 | =    | 3.1±0.3 | > | 2.0±0.2                                                                               | =    | 1.4±0.4                                                                  | >       | 0.7±0.1                                                                  | <       | 1.4±0.2 | =       | 1.2±0.5 | =       | 2.8±0.3 | 1.4±0.3 |   |   |
| 16:3/16:0  | +                                                                      | =    | +       | =    | +       | =    | +       | <                                                                             | +       | =    | 0.1±0.0 | >    | +       | = | +                                                                                     | =    | +                                                                        | +       | +                                                                        | =       | +       | =       | 0.1±0.0 | =       | -       | =       | + | = |

|            |         |   |         |   |         |   |         |   |         |   |         |   |         |   |         |   |         |   |         |   |         |   |         |   |         |         |         |         |         |   |         |   |         |         |         |   |
|------------|---------|---|---------|---|---------|---|---------|---|---------|---|---------|---|---------|---|---------|---|---------|---|---------|---|---------|---|---------|---|---------|---------|---------|---------|---------|---|---------|---|---------|---------|---------|---|
| 16:0/16:3  | -       | < | +       | = | +       | = | +       | = | +       | = | +       | = | -       | < | +       | > | +       | = | +       | = | +       | = | +       | = | +       | +       | +       | =       | +       | = | +       | = | +       | =       | -       | = |
| 16:1/16:1  | +       | = | +       | = | +       | = | +       | = | +       | < | +       | > | 0.1±0.0 | = | +       | = | +       | = | +       | > | +       | = | +       | = | 0.1±0.1 | +       | 0.1±0.0 | =       | +       | = | 0.2±0.0 | = | +       | =       |         |   |
| 14:0/18:2  | 1.6±0.3 | = | 1.4±0.1 | = | 1.5±0.3 | < | 2.4±0.7 | = | 3.0±0.1 | > | 1.5±0.4 | = | 1.3±0.0 | = | 1.3±0.2 | = | 1.0±0.2 | = | 1.1±0.2 | < | 1.4±0.2 | = | 1.3±0.1 | = | 1.2±0.3 | 1.0±0.1 | 2.0±0.2 | =       | 1.2±0.2 | = | 1.5±0.0 | > | 1.1±0.1 | =       |         |   |
| 14:0/18:2  | +       | = | +       | = | +       | > | -       | < | +       | = | +       | > | +       | > | +       | = | +       | = | +       | < | +       | = | +       | > | +       | -       | +       | =       | +       | = | +       | = | +       | =       | +       | = |
| 16:0/16:2  | +       | = | +       | = | +       | = | +       | = | +       | = | +       | = | +       | = | +       | = | +       | = | +       | = | +       | = | +       | = | -       | +       | +       | =       | +       | = | +       | = | +       | =       | +       | = |
| 14:0/18:1  | 2.3±0.5 | > | 1.3±0.2 | > | 0.9±0.2 | < | 2.1±0.2 | = | 2.0±0.2 | = | 1.9±0.9 | = | 1.9±0.1 | > | 1.5±0.2 | > | 1.1±0.0 | < | 1.6±0.3 | > | 1.0±0.1 | = | 0.9±0.4 | < | 1.9±0.0 | 1.1±0.3 | 3.1±0.4 | =       | 1.3±0.0 | = | 2.4±0.1 | > | 0.7±0.1 | =       |         |   |
| 16:0/16:1  | +       | > | +       | = | +       | < | +       | = | +       | = | +       | = | +       | = | +       | = | +       | > | -       | < | +       | = | +       | > | +       | +       | +       | =       | +       | = | +       | = | +       | =       | +       | = |
| 16:0/16:0  | +       | > | -       | < | +       | = | +       | = | +       | = | +       | = | +       | > | -       | < | +       | = | -       | = | -       | < | +       | > | +       | +       | +       | =       | +       | = | +       | = | +       | =       | +       | = |
| 15:2/18:4  | +       | = | +       | = | 0.1±0.0 | = | +       | = | +       | = | +       | = | +       | = | 0.1±0.0 | = | 0.1±0.0 | = | +       | > | +       | > | -       | < | +       | -       | +       | =       | -       | = | +       | = | -       | =       | -       | = |
| 15:1/18:4  | +       | = | 0.1±0.0 | = | 0.1±0.0 | = | 0.1±0.0 | = | 0.1±0.0 | = | +       | < | 0.1±0.0 | < | 0.1±0.0 | = | 0.1±0.0 | > | 0.1±0.0 | = | 0.1±0.0 | > | +       | < | 0.1±0.0 | +       | 0.1±0.0 | =       | +       | = | 0.1±0.0 | = | +       | =       | +       | = |
| 16:1/17:3  | +       | = | +       | < | +       | = | +       | = | +       | = | +       | = | +       | = | +       | = | +       | < | +       | = | +       | = | +       | = | +       | +       | +       | =       | +       | = | +       | = | +       | =       | +       | = |
| 15:0/18:4  | +       | = | +       | = | +       | = | +       | = | +       | = | +       | = | +       | > | +       | > | +       | = | +       | = | +       | = | +       | = | +       | +       | +       | =       | +       | = | +       | = | +       | =       | +       | = |
| 15:0/18:4  | 0.1±0.0 | > | +       | < | +       | > | +       | = | +       | = | +       | > | +       | = | +       | > | +       | = | +       | = | +       | < | +       | > | +       | +       | +       | =       | +       | = | +       | = | +       | =       | +       | = |
| 18:2/15:1  | +       | = | +       | = | +       | = | 0.1±0.0 | = | 0.1±0.0 | > | +       | < | +       | < | +       | = | +       | = | +       | = | +       | = | +       | = | +       | +       | +       | =       | +       | = | +       | = | +       | =       | +       | = |
| 18:3/15:0  | +       | = | +       | = | +       | = | +       | > | -       | < | +       | = | +       | = | +       | = | +       | > | +       | < | +       | = | +       | = | +       | +       | +       | =       | +       | = | +       | = | +       | =       | -       | = |
| 15:0/18:3  | +       | = | 0.1±0.0 | = | 0.1±0.0 | = | +       | = | 0.1±0.0 | > | +       | = | 0.1±0.0 | > | 0.1±0.0 | > | 0.1±0.0 | = | 0.1±0.0 | > | +       | < | +       | < | 0.1±0.0 | >       | 0.1±0.0 | 0.2±0.1 | 0.1±0.0 | = | +       | = | 0.2±0.0 | >       | 0.1±0.1 | = |
| 16:0/17:3  | -       | = | -       | < | +       | = | +       | > | -       | < | +       | = | -       | = | -       | = | +       | = | +       | < | +       | = | +       | = | +       | +       | +       | =       | -       | = | -       | = | -       | =       | -       | = |
| 15:0/18:2+ | +       | = | +       | = | +       | = | 0.1±0.0 | = | +       | = | +       | = | +       | = | 0.1±0.0 | = | 0.1±0.0 | > | +       | < | 0.1±0.0 | > | +       | = | 0.1±0.0 | 0.1±0.0 | 0.1±0.0 | >       | 0.1±0.0 | = | 0.1±0.0 | = | 0.1±0.0 | =       | 0.1±0.0 | = |
| 18:2/15:0  | +       | = | +       | = | +       | = | 0.1±0.0 | = | +       | = | +       | = | +       | = | 0.1±0.0 | = | 0.1±0.0 | > | +       | < | 0.1±0.0 | > | +       | = | 0.1±0.0 | 0.1±0.0 | 0.1±0.0 | =       | 0.1±0.0 | = | 0.1±0.0 | = | 0.1±0.0 | =       | 0.1±0.0 | = |
| 15:0/18:1  | 0.1±0.0 | = | +       | = | +       | < | 0.1±0.0 | > | +       | < | 0.1±0.0 | > | 0.1±0.0 | = | 0.1±0.0 | > | +       | = | +       | = | 0.1±0.0 | < | 0.1±0.0 | > | 0.1±0.0 | 0.1±0.0 | 0.1±0.0 | =       | 0.1±0.0 | = | 0.1±0.0 | = | 0.1±0.0 | =       | +       | = |
| 18:5/16:4  | +       | = | +       | = | +       | > | -       | = | -       | < | +       | > | +       | < | +       | = | +       | = | +       | = | +       | = | +       | = | +       | -       | +       | =       | +       | = | +       | = | +       | =       | -       | = |
| 16:4/18:4  | 0.4±0.1 | < | 2.0±0.1 | < | 2.6±0.4 | > | 1.2±0.1 | = | 1.5±0.2 | > | 0.2±0.1 | < | 0.4±0.1 | < | 1.5±0.2 | = | 1.2±0.2 | > | 0.6±0.1 | < | 1.1±0.2 | > | 0.3±0.2 | < | 0.3±0.1 | 0.2±0.1 | 0.6±0.0 | =       | 0.3±0.1 | = | 0.5±0.1 | = | 0.4±0.1 | =       |         |   |
| 16:3/18:5  | +       | > | -       | = | -       | = | -       | < | +       | = | +       | > | +       | > | -       | = | -       | = | -       | < | +       | = | +       | > | +       | 0.2±0.1 | -       | =       | +       | = | +       | = | +       | =       | +       | = |
| 16:3/18:4  | 0.3±0.1 | < | 0.9±0.1 | < | 1.3±0.2 | = | 1.1±0.1 | = | 1.0±0.1 | > | 0.4±0.1 | < | 0.4±0.0 | < | 0.7±0.1 | = | 0.8±0.1 | > | 0.5±0.2 | < | 0.8±0.2 | > | 0.3±0.1 | = | 0.3±0.1 | 0.2±0.0 | 0.4±0.0 | =       | 0.4±0.1 | = | 0.4±0.0 | = | 0.5±0.1 | =       |         |   |
| 18:3/16:4  | -       | < | +       | > | -       | < | +       | = | +       | = | +       | = | +       | = | +       | > | -       | < | +       | = | +       | < | 0.1±0.0 | > | +       | 0.1±0.1 | +       | =       | +       | = | +       | = | 0.1±0.0 | =       |         |   |
| 18:4/16:3  | +       | = | +       | = | +       | = | +       | = | +       | = | +       | = | +       | = | +       | = | +       | > | -       | < | +       | < | 0.1±0.0 | > | +       | 0.1±0.1 | +       | =       | +       | = | +       | = | +       | =       | +       | = |
| 16:3/18:3  | 0.1±0.0 | = | 0.2±0.0 | < | 0.3±0.0 | = | 0.3±0.1 | = | 0.4±0.1 | > | 0.2±0.1 | < | 0.1±0.1 | = | 0.2±0.0 | = | 0.2±0.1 | < | 0.3±0.1 | = | 0.2±0.1 | < | 0.3±0.1 | = | 0.1±0.0 | 0.2±0.0 | 0.1±0.0 | =       | 0.2±0.0 | = | 0.2±0.0 | = | 0.1±0.1 | =       |         |   |
| 16:2/18:4  | 0.2±0.0 | < | 0.3±0.1 | = | 0.4±0.0 | < | 0.4±0.0 | > | 0.3±0.0 | > | 0.2±0.1 | < | 0.3±0.0 | < | 0.4±0.0 | = | 0.4±0.0 | = | 0.3±0.1 | = | 0.3±0.1 | = | 0.1±0.1 | < | 0.1±0.0 | 0.1±0.1 | 0.3±0.1 | =       | 0.3±0.0 | = | 0.2±0.1 | = | 0.2±0.1 | =       |         |   |
| 18:3/16:2  | +       | < | 0.1±0.0 | < | 0.1±0.0 | = | 0.1±0.0 | = | 0.1±0.1 | = | 0.1±0.1 | = | +       | = | 0.1±0.0 | = | 0.1±0.0 | > | +       | < | 0.1±0.0 | = | 0.1±0.0 | = | +       | +       | +       | =       | 0.1±0.0 | = | +       | = | 0.1±0.0 | =       |         |   |
| 16:1/18:4  | 0.4±0.1 | < | 0.7±0.1 | = | 0.7±0.0 | = | 1.0±0.3 | = | 0.7±0.2 | = | 0.6±0.1 | < | 0.4±0.1 | < | 0.6±0.1 | = | 0.5±0.2 | = | 0.6±0.2 | = | 0.6±0.1 | > | 0.2±0.1 | < | 0.2±0.1 | 0.1±0.1 | 0.7±0.0 | =       | 0.5±0.1 | = | 0.4±0.0 | = | 0.3±0.3 | =       |         |   |
| 16:1/18:4  | 0.2±0.1 | < | 0.5±0.1 | < | 0.8±0.1 | > | 0.5±0.2 | = | 0.4±0.1 | > | 0.2±0.0 | < | 0.2±0.1 | < | 0.4±0.2 | = | 0.4±0.1 | = | 0.3±0.1 | = | 0.4±0.1 | > | 0.1±0.0 | = | 0.1±0.0 | 0.1±0.0 | 0.2±0.1 | =       | 0.1±0.0 | = | 0.2±0.1 | = | 0.1±0.0 | =       |         |   |
| 18:1/16:4  | 0.2±0.1 | > | -       | = | -       | = | -       | < | 0.1±0.0 | = | 0.2±0.1 | > | 0.1±0.1 | = | -       | = | -       | = | -       | < | +       | < | 0.1±0.0 | > | 0.1±0.0 | 0.1±0.0 | 0.1±0.0 | =       | 0.1±0.0 | = | 0.1±0.0 | = | 0.1±0.0 | =       |         |   |
| 20:5/14:0  | +       | = | +       | = | +       | = | 0.1±0.1 | = | 0.1±0.0 | > | +       | = | +       | = | +       | = | +       | = | +       | < | 0.1±0.0 | > | +       | = | 0.1±0.0 | 0.1±0.0 | +       | =       | +       | = | 0.1±0.0 | = | +       | =       | +       | = |
| 14:0/20:5  | +       | = | +       | = | +       | = | +       | = | +       | = | +       | = | +       | > | +       | < | +       | = | +       | > | +       | < | 0.1±0.0 | > | 0.1±0.0 | 0.1±0.0 | +       | =       | -       | = | 0.1±0.0 | = | +       | =       | +       | = |
| 16:2/18:2  | 0.1±0.0 | < | 0.3±0.1 | = | 0.2±0.0 | = | 0.3±0.2 | = | 0.3±0.1 | > | 0.1±0.0 | = | 0.2±0.0 | < | 0.3±0.1 | > | 0.2±0.0 | > | 0.1±0.0 | = | 0.2±0.1 | = | 0.1±0.0 | = | 0.1±0.1 | 0.1±0.0 | 0.2±0.1 | =       | 0.2±0.1 | = | 0.1±0.0 | = | 0.1±0.1 | =       |         |   |
| 16:1/18:3  | 0.1±0.0 | = | -       | = | 0.1±0.1 | = | 0.2±0.1 | = | 0.1±0.0 | = | 0.1±0.0 | = | 0.1±0.0 | > | -       | < | +       | = | 0.1±0.1 | > | -       | < | 0.1±0.0 | = | 0.1±0.0 | +       | +       | =       | 0.1±0.0 | = | +       | = | 0.1±0.0 | =       |         |   |
| 18:1/16:3  | 0.1±0.0 | = | 0.1±0.0 | = | 0.1±0.1 | = | +       | = | +       | < | 0.1±0.0 | > | 0.1±0.0 | = | 0.1±0.0 | = | 0.1±0.0 | > | 0.1±0.0 | = | 0.1±0.0 | > | +       | < | 0.1±0.0 | =       | 0.1±0.0 | 0.1±0.0 | 0.1±0.0 | = | 0.1±0.0 | = | 0.2±0.0 | =       | 0.1±0.1 | = |
| 14:0/20:4  | +       | = | +       | = | +       | = | 0.1±0.1 | = | 0.1±0.1 | = | 0.1±0.0 | = | +       | > | +       | = | +       | = | +       | = | +       | = | +       | = | +       | +       | 0.1±0.1 | -       | =       | + | =       | - | =       | 0.1±0.0 | =       |   |
| 16:0/18:4  | 3.2±0.2 | > | 2.6±0.5 | = | 3.1±0.4 | = | 2.2±0.9 | = | 2.1±0.1 | = | 2.5±1.3 | = | 1.3±0.1 | > | 0.8±0.4 | = | 0.7±0.2 | = | 0.4±0.2 | = | 0.6±0.1 | = | 0.9±0.6 | = | 1.2±0.1 | 1.6±0.2 | 3.0±0.5 | =       | 1.7±0.5 | = | 0.9±0.0 | < | 0.7±0.1 | =       |         |   |
| 16:1/18:2  | 0.1±0.1 | < | 0.2±0.0 | = | 0.2±0.0 | < | 0.4±0.1 | > | 0.1±0.0 | > | 0.1±0.0 | < | +       | < | 0.1±0.0 | = | 0.1±0.0 | = | 0.1±0.0 | = | 0.1±0.1 | > | +       | < | +       | +       | 0.1±0.0 | =       | 0.1±0.0 | = | 0.1±0.0 | = | +       | =       | +       | = |
| 18:1/16:2  | +       | = | +       | = | +       | < | 0.1±0.0 | = | 0.1±0.0 | > | +       | < | +       | < | 0.1±0.0 | = | +       | = | 0.1±0.0 | = | +       | = | 0.1±0.0 | = | +       | +       | +       | =       | +       | = | 0.1±0.0 | > | +       | =       | +       | = |
| 14:0/20:3  | 1.2±2.0 | = | +       | = | +       | = | +       | = | 0.1±0.0 | > | +       | = | +       | = | +       | = | +       | = | +       | < | 0.1±0.0 | = | +       | = | +       | +       | +       | =       | +       | = | -       | = | -       | =       | -       | = |
| 16:0/18:3  | 3.5±0.2 | = | 4.4±0.8 | = | 4.1±0.5 | = | 3.1±1.4 | = | 3.3±0.1 | > | 2.0±0.7 | = | 2.8±0.4 | = | 2.6±0.8 | = | 2.2±0.4 | > | 1.5±0.4 | < | 2.1±0.2 | = | 2.0±0.6 | = | 3.1±0.5 | 2.8±0.4 | 4.5±0.6 | =       | 2.0±0.4 | = | 3.4±0.0 | = | 2.2±0.5 | =       |         |   |

|           |                                                                   |                                                             |                                                  |            |
|-----------|-------------------------------------------------------------------|-------------------------------------------------------------|--------------------------------------------------|------------|
| 16:1/18:1 | 0.1±0.0 = 0.1±0.0 > + < 0.1±0.0 = 0.1±0.0 = + =                   | + = 0.1±0.0 = 0.1±0.0 = 0.1±0.0 = + = + <                   | + + 0.1±0.0 = + = + =                            | + =        |
| 16:0/18:2 | 1.8±0.4 < 2.6±0.3 = 2.9±0.4 = 4.0±0.9 = 3.8±0.3 > 2.1±0.4 <       | 1.5±0.0 < 2.2±0.5 = 2.0±0.2 < 2.5±0.3 = 2.5±0.2 > 1.6±0.4 < | 1.8±0.2 1.7±0.5 1.9±0.2 = 1.8±0.3 = 1.9±0.1 >    | 1.6±0.6 =  |
| 16:0/18:2 | + = + = + = + = + = + = + =                                       | + = + = + = + = + = + = + =                                 | + = + = + =                                      | - =        |
| 18:1/16:1 | + = + = + < + = + = + =                                           | + = + = + = + = + = + = + =                                 | + = + = + =                                      | - =        |
| 16:0/18:1 | 3.0±0.5 = 2.3±0.3 = 2.3±0.4 < 3.8±0.6 > 2.8±0.1 = 2.9±1.3 =       | 2.6±0.1 = 2.8±0.3 = 2.5±0.5 < 4.0±0.4 > 2.3±0.3 > 1.3±0.4 < | 3.6±0.4 2.2±0.5 3.3±0.2 = 2.4±0.1 = 3.5±0.3 =    | 1.3±0.5 =  |
| 16:0/18:1 | + = + = + = + = + = + > - <                                       | + = + = + = + = + = + = + =                                 | + - - = + = + =                                  | + =        |
| 16:0/18:0 | - = - < + > - < + = + >                                           | + = - = + > - = + = + >                                     | + + + = + = + =                                  | - =        |
| 20:5/15:0 | + > - < + = + = + > + =                                           | + > - < + > - = + = + >                                     | + + + = + = + =                                  | + =        |
| 15:0/20:5 | + > + = + = + = + = + <                                           | + > + = + > + = + > - <                                     | + + + = - = + <                                  | + =        |
| 15:0/20:4 | + = + = + = + > + = + =                                           | + = + = + = + = + = + = + =                                 | + + + = + = + =                                  | + =        |
| 17:0/18:4 | + = + = + = + < 0.1±0.0 = + =                                     | + = + = + = + = + = + = + =                                 | + + + = + = + =                                  | + =        |
| 17:0/18:3 | + > + = + = + = + = + =                                           | + > + = + = + = + < + >                                     | + + + = + = + =                                  | + =        |
| 17:1/18:1 | + = - = - < + > - < + =                                           | - = - = - = - = - = - =                                     | - + + = + = + =                                  | - =        |
| 17:0/18:2 | + = + = + = + = + = + =                                           | + = + = + = + = + = + = + =                                 | + + + = + = + =                                  | + =        |
| 16:0/19:1 | - = - = - < + > - < + =                                           | + > - < + > - < + > - =                                     | + + - = - = - =                                  | + =        |
| 17:0/18:1 | + > + = + = + = + = + =                                           | + < + > + = + < + < + >                                     | + + + = + = + =                                  | + =        |
| 18:5/18:5 | + < + > - < + > - = - <                                           | - < + > - = - = - < + >                                     | + - + = - = + =                                  | + =        |
| 18:5/18:4 | 0.1±0.0 < 0.4±0.0 > 0.4±0.0 > 0.2±0.0 = 0.2±0.1 > 0.1±0.0 <       | 0.2±0.0 < 0.6±0.0 > 0.5±0.0 > 0.2±0.0 = 0.2±0.0 > 0.1±0.1 < | 0.2±0.0 0.2±0.1 0.2±0.0 = 0.1±0.0 = 0.2±0.1 =    | 0.2±0.1 =  |
| 20:5/16:4 | 0.2±0.1 = 0.4±0.3 = 0.3±0.1 = 0.2±0.2 = 0.1±0.0 > 0.1±0.0 =       | 0.4±0.3 < 1.5±0.8 > 0.3±0.1 = 0.5±0.3 = 0.3±0.1 > 0.2±0.0 = | 0.7±0.4 0.6±0.3 0.4±0.2 = 0.1±0.0 = 2.4±0.1 >    | 0.1±0.0 <  |
| 18:4/18:4 | 30.7±3.1 < 38.4±3.1 = 39.5±0.5 > 31.5±2.5 = 32.0±2.4 > 20.0±4.4 < | 34.8±4.1=33.9±2.8=34.6±3.7=31.6±1.9>27.4±2.2>22.8±2.0 <     | 36.2±2.730.2±1.827.0±5.8 = 20.5±1.3 = 29.4±0.6 = | 26.3±7.4 = |
| 18:3/18:4 | 9.8±1.3 > 4.7±0.3 > 3.1±0.6 = 3.6±1.0 = 4.1±0.2 < 9.6±2.2 >       | 11.1±0.4>6.1±0.5 = 6.9±0.6 > 5.6±0.6 = 5.9±0.2 <14.6±1.9 >  | 9.4±0.8 10.8±2.3 9.1±1.1 = 10.8±2.4 = 10.1±0.3 = | 11.9±2.4 = |
| 18:4/18:3 | 3.0±0.7 = 3.2±0.6 = 3.5±1.7 = 4.6±1.0 = 5.0±0.5 = 5.4±1.3 =       | 1.7±0.2 < 2.6±0.6 = 2.4±0.8 = 3.0±0.6 = 3.0±0.5 = 2.2±0.6 = | 1.8±0.4 3.3±0.5 3.8±0.0 = 4.1±0.8 = 1.9±0.2 =    | 3.1±1.3 =  |
| 18:3/18:3 | 1.5±0.4 > 1.0±0.1 = 0.8±0.1 = 1.0±0.5 = 0.8±0.1 < 2.1±1.1 =       | 2.5±0.3 > 1.4±0.2 < 2.2±0.3 > 1.8±0.1 < 2.3±0.3 < 4.2±1.3 > | 2.0±0.3 2.5±0.8 1.5±0.2 = 2.7±0.0 = 2.7±0.1 =    | 3.6±1.2 =  |
| 18:3/18:3 | 0.8±0.0 = 0.3±0.0 = 0.5±0.0 = 0.8±0.2 = 0.5±0.4 = 1.6±0.0 =       | - < 0.3±0.0 > - < 0.7±0.0 = 0.9±0.3 = 0.9±0.4 =             | 0.4±0.0 - - = - = - =                            | - =        |
| 18:2/18:4 | 1.1±0.7 = 0.4±0.2 = 0.4±0.1 = 0.4±0.2 = 0.7±0.5 < 3.4±0.7 >       | 0.8±0.2 > 0.5±0.1 = 0.9±0.4 = 1.2±0.3 = 0.9±0.6 = 1.1±0.4 = | 0.9±0.2 1.9±0.5 1.1±0.2 = 3.0±0.5 = 0.7±0.0 =    | 2.3±1.2 =  |
| 20:5/16:1 | 0.1±0.0 = 0.1±0.0 = 0.2±0.2 = 0.2±0.1 = 0.2±0.1 = 0.4±0.1 >       | 0.1±0.1 = 0.1±0.0 > 0.1±0.0 < 0.2±0.0 = 0.2±0.0 = 0.2±0.1 = | 0.1±0.1 0.2±0.1 0.1±0.1 = 0.5±0.3 = 0.1±0.0 =    | 0.2±0.1 =  |
| 18:3/18:2 | 1.4±0.2 = 1.6±0.1 > 1.2±0.2 < 2.0±0.1 > 1.6±0.1 < 3.1±0.7 >       | 1.3±0.3 = 1.5±0.0 = 1.6±0.1 < 1.9±0.2 = 2.3±0.3 = 2.6±0.2 > | 1.4±0.0 1.8±0.3 1.4±0.2 = 3.5±0.3 = 1.3±0.0 =    | 2.9±1.0 =  |
| 18:2/18:3 | 0.5±0.6 = 0.1±0.0 = 0.1±0.1 = 0.2±0.0 = 0.2±0.0 < 0.7±0.5 >       | 0.1±0.1 = 0.1±0.0 = 0.1±0.0 < 0.1±0.0 = 0.2±0.0 > 0.1±0.0 = | 0.1±0.0 0.4±0.1 0.2±0.0 = 0.6±0.0 = + =          | 0.3±0.0 >  |
| 18:4/18:1 | 0.2±0.0 > 0.1±0.0 = + = + > + < 0.2±0.1 >                         | 0.2±0.0 > 0.1±0.0 = 0.1±0.0 = 0.1±0.0 = + < 0.1±0.0 =       | 0.2±0.1 0.2±0.0 0.2±0.0 = 0.1±0.0 = 0.1±0.1 =    | 0.1±0.0 =  |
| 18:1/18:4 | + = + = + = + = + = + < 0.1±0.0 =                                 | + = + = + = 0.1±0.1 = + = + =                               | - + + = + = + =                                  | - =        |
| 20:5/16:0 | + > + > - < + = + = + =                                           | + = + = + = + = + = + = + =                                 | 0.1±0.0 + + = + = + =                            | + =        |
| 20:5/16:0 | + = + = + = + = + = + = 0.1±0.0 =                                 | + < 0.1±0.0 = 0.1±0.0 = 0.1±0.0 = 0.1±0.0 = + =             | 0.1±0.1 0.1±0.0 + = 0.1±0.0 = 0.1±0.0 =          | 0.1±0.0 =  |
| 16:0/20:5 | 0.1±0.0 = + = + = 0.1±0.0 = + = 0.1±0.0 =                         | + = 0.1±0.0 = 0.1±0.0 = + < 0.1±0.0 = 0.1±0.0 =             | 0.1±0.1 0.2±0.1 + = + = 0.1±0.0 =                | - =        |
| 18:2/18:2 | 0.8±0.1 < 1.2±0.1 = 1.1±0.3 = 1.8±0.6 = 1.5±0.1 = 1.6±0.5 =       | 0.6±0.1 < 1.1±0.1 > 0.9±0.0 < 1.5±0.1 = 1.7±0.4 > 0.6±0.1 < | 0.6±0.0 0.7±0.1 1.0±0.2 = 1.9±0.0 = 0.5±0.0 =    | 0.7±0.1 =  |
| 18:3/18:1 | 0.3±0.1 = 0.3±0.1 > 0.1±0.0 = 0.3±0.2 = 0.2±0.0 = 0.3±0.1 =       | 0.4±0.1 = 0.4±0.1 = 0.3±0.1 = 0.4±0.2 = 0.3±0.0 = 0.2±0.1 < | 0.6±0.1 0.4±0.1 0.4±0.1 = 0.3±0.0 = 0.5±0.0 =    | 0.2±0.0 =  |
| 18:1/18:3 | 0.3±0.1 = 0.3±0.1 > 0.1±0.0 > 0.1±0.0 = + < 0.3±0.1 >             | 0.4±0.1 = 0.4±0.1 = 0.3±0.1 > + > + < 0.2±0.1 >             | 0.6±0.1 0.4±0.1 0.4±0.1 = 0.3±0.0 = 0.5±0.0 =    | 0.2±0.0 =  |
| 16:0/20:4 | + = + = + < + = + = + = 0.1±0.1 =                                 | 0.1±0.0 > + = + = + = + = + = + =                           | 0.1±0.0 0.1±0.0 + = + = + =                      | 0.2±0.3 =  |
| 20:4/16:0 | 0.1±0.0 > + = + < + > + = + =                                     | + = + = + = + = + < 0.1±0.0 >                               | 0.1±0.0 0.2±0.2 + = + = 0.1±0.1 =                | + =        |
| 16:0/20:4 | + = - < + = + > + = + =                                           | + > - < + = + = + < + =                                     | + + + = + = + =                                  | + =        |
| 20:4/16:0 | + = + < + = + = + < 0.1±0.0 >                                     | + = + = + = + = + < + >                                     | + + + = + = - =                                  | + =        |
| 16:0/20:4 | 0.8±0.4 > 0.2±0.1 = 0.2±0.1 > 0.1±0.0 = 0.2±0.2 = 0.2±0.1 >       | 0.2±0.1 = 0.1±0.1 = 0.1±0.0 = 0.1±0.1 = 0.1±0.0 < 0.1±0.0 = | 0.2±0.0 0.1±0.1 0.6±0.1 = 0.1±0.1 = 0.1±0.0 =    | 0.2±0.1 =  |
| 18:0/18:4 | 1.1±0.1 > 0.2±0.1 = 0.1±0.1 = 0.1±0.0 = 0.1±0.1 = 0.2±0.1 =       | 0.1±0.0 > 0.1±0.0 = 0.1±0.1 = 0.1±0.0 = 0.1±0.0 = 0.1±0.1 = | 0.1±0.0 0.2±0.1 0.3±0.0 = 0.1±0.1 = 0.2±0.0 =    | 0.1±0.0 =  |
| 18:2/18:1 | 0.3±0.1 = 0.3±0.0 > 0.2±0.0 < 0.4±0.1 = 0.3±0.1 = 0.4±0.2 =       | 0.3±0.1 < 0.4±0.0 = 0.4±0.0 < 0.5±0.1 > 0.3±0.0 > 0.1±0.1 < | 0.3±0.0 0.3±0.1 0.4±0.1 = 0.4±0.1 = 0.2±0.0 =    | 0.1±0.0 =  |

|           |          |   |          |   |          |   |          |   |          |   |          |   |          |   |          |   |          |          |          |         |          |   |          |   |          |          |          |         |          |         |          |   |          |   |          |   |   |   |
|-----------|----------|---|----------|---|----------|---|----------|---|----------|---|----------|---|----------|---|----------|---|----------|----------|----------|---------|----------|---|----------|---|----------|----------|----------|---------|----------|---------|----------|---|----------|---|----------|---|---|---|
| 16:0/20:3 | -        | = | -        | = | -        | < | +        | = | +        | > | -        | < | -        | = | -        | < | -        | -        | -        | =       | -        | = | -        | = |          |          |          |         |          |         |          |   |          |   |          |   |   |   |
| 20:3/16:0 | +        | > | +        | = | +        | = | +        | = | +        | = | +        | = | +        | + | =        | + | =        | +        | +        | =       | +        | = | +        | = |          |          |          |         |          |         |          |   |          |   |          |   |   |   |
| 16:0/20:3 | +        | = | +        | = | +        | = | +        | = | +        | = | 0.1±0.0  | = | +        | = | +        | = | +        | <0.1±0.0 | >        | 0.1±0.0 | +        | + | =        | + | =        |          |          |         |          |         |          |   |          |   |          |   |   |   |
| 16:0/20:3 | 0.2±0.0  | = | 0.1±0.0  | > | +        | = | +        | = | +        | < | 0.1±0.1  | = | 0.1±0.0  | > | +        | = | +        | >        | -        | <       | +        | = | 0.1±0.1  | = | 0.1±0.0  | 0.1±0.0  | -        | =       | 0.1±0.0  | =       | 0.1±0.0  | < | -        | = |          |   |   |   |
| 18:0/18:3 | 0.3±0.2  | > | 0.1±0.0  | = | 0.1±0.0  | > | +        | = | 0.1±0.1  | = | 0.1±0.1  | = | 0.1±0.1  | = | 0.1±0.0  | > | +        | =        | +        | =       | 0.1±0.1  | = | 0.2±0.2  | = | 0.1±0.0  | 0.1±0.0  | 0.2±0.1  | =       | 0.1±0.0  | =       | 0.1±0.0  | = | 0.3±0.1  | = |          |   |   |   |
| 18:1/18:1 | 0.2±0.1  | = | 0.1±0.0  | = | 0.1±0.0  | < | 0.2±0.0  | > | 0.1±0.0  | = | 0.1±0.0  | = | 0.1±0.0  | < | 0.1±0.0  | < | 0.1±0.0  | =        | 0.1±0.0  | =       | 0.1±0.0  | > | 0.1±0.0  | = | 0.1±0.0  | <        | 0.2±0.1  | 0.1±0.0 | 0.2±0.0  | =       | +        | = | 0.1±0.0  | > | +        | = |   |   |
| 18:0/18:2 | 0.1±0.0  | = | +        | = | +        | = | +        | = | 0.1±0.0  | > | +        | = | +        | < | +        | = | +        | =        | +        | =       | +        | = | +        | = | +        | +        | 0.1±0.0  | =       | +        | =       | +        | = | +        | = | 0.1±0.0  | = |   |   |
| 18:0/18:1 | 0.2±0.0  | > | 0.1±0.0  | = | 0.1±0.0  | < | 0.1±0.0  | = | 0.1±0.0  | = | 0.1±0.0  | = | 0.1±0.0  | = | 0.1±0.0  | > | 0.1±0.0  | =        | 0.1±0.0  | >       | 0.1±0.0  | = | 0.1±0.0  | > | +        | =        | +        | <       | 0.1±0.0  | 0.1±0.0 | 0.2±0.0  | = | +        | = | 0.1±0.0  | = | + | = |
| 18:4/19:2 | 0.1±0.0  | > | +        | > | +        | = | +        | = | +        | < | +        | = | 0.1±0.0  | = | 0.1±0.0  | = | +        | =        | +        | =       | +        | = | +        | = | +        | +        | 0.1±0.0  | =       | +        | =       | +        | = | +        | = | +        | = |   |   |
| 18:3/19:2 | +        | = | +        | = | +        | = | +        | = | +        | = | +        | = | +        | = | +        | = | +        | =        | +        | =       | +        | = | +        | = | +        | +        | +        | =       | +        | =       | +        | = | +        | = | +        | = |   |   |
| 19:1/18:4 | +        | = | +        | = | +        | = | +        | < | +        | > | +        | = | +        | = | +        | = | +        | =        | +        | =       | +        | < | +        | > | +        | +        | +        | =       | +        | =       | +        | = | +        | = | +        | = |   |   |
| 18:3/19:1 | +        | = | +        | = | -        | < | +        | = | +        | = | +        | = | +        | = | +        | = | +        | =        | +        | =       | +        | = | +        | = | +        | +        | +        | =       | +        | =       | +        | = | +        | = | +        | = |   |   |
| 20:5/18:5 | 0.1±0.0  | < | 0.1±0.0  | = | 0.1±0.0  | > | 0.1±0.0  | = | 0.1±0.0  | > | +        | < | 0.1±0.0  | < | 0.1±0.0  | = | 0.1±0.0  | =        | 0.1±0.0  | =       | 0.1±0.0  | < | 0.1±0.0  | > | +        | <        | 0.1±0.0  | <       | 0.1±0.0  | =       | 0.1±0.0  | = | 0.1±0.0  | > | +        | < |   |   |
| 20:5/18:4 | 13.7±0.9 | < | 16.4±0.9 | = | 15.2±3.6 | = | 15.1±4.1 | = | 15.7±0.9 | = | 14.5±2.1 | = | 16.4±1.0 | < | 21.5±1.8 | = | 24.0±1.8 | >        | 21.4±0.6 | <       | 23.3±1.0 | = | 19.1±3.7 | = | 15.8±0.5 | 17.0±3.9 | 14.5±0.1 | =       | 14.8±2.3 | =       | 16.9±0.3 | = | 18.0±2.1 | = | 18.0±2.1 | = |   |   |
| 20:4/18:4 | 1.9±0.3  | > | 1.2±0.1  | < | 1.4±0.1  | = | 1.1±0.5  | = | 0.6±0.0  | < | 1.6±0.4  | = | 2.0±0.2  | > | 0.8±0.1  | = | 0.8±0.2  | =        | 0.7±0.4  | =       | 0.8±0.2  | = | 0.8±0.1  | = | 1.1±0.2  | 0.7±0.6  | 2.2±0.3  | =       | 1.0±0.3  | =       | 1.1±0.0  | < | 1.5±0.7  | = | 1.5±0.7  | = |   |   |
| 20:5/18:3 | 0.4±0.2  | = | 0.3±0.1  | = | 0.3±0.1  | < | 0.9±0.5  | = | 0.6±0.2  | = | 0.9±0.7  | = | 1.1±0.2  | = | 0.9±0.3  | < | 1.5±0.4  | <        | 2.8±0.9  | =       | 2.3±0.4  | = | 4.5±2.2  | = | 1.4±0.2  | 3.0±0.5  | 0.3±0.1  | =       | 1.6±0.4  | =       | 1.6±0.5  | = | 2.9±0.8  | = | 2.9±0.8  | = |   |   |
| 20:4/18:4 | 2.8±0.3  | > | 2.1±0.2  | = | 2.5±0.3  | < | 3.6±0.5  | = | 3.8±0.4  | < | 9.6±2.8  | > | 2.5±0.4  | = | 2.3±0.5  | = | 2.7±0.6  | <        | 4.6±1.0  | =       | 4.9±0.3  | < | 5.6±0.4  | = | 1.8±0.1  | 2.9±0.7  | 2.9±0.2  | =       | 11.6±1.9 | =       | 2.0±0.3  | = | 5.7±2.5  | = | 5.7±2.5  | = |   |   |
| 20:4/18:3 | 0.2±0.1  | > | +        | = | +        | = | 0.1±0.0  | = | 0.1±0.0  | = | 0.1±0.1  | = | 0.4±0.1  | > | 0.1±0.0  | < | 0.1±0.0  | <        | 0.2±0.0  | =       | 0.2±0.1  | < | 0.5±0.2  | > | 0.3±0.1  | 0.4±0.2  | 0.1±0.0  | =       | 0.2±0.0  | =       | 0.4±0.1  | = | 0.5±0.1  | = | 0.5±0.1  | = |   |   |
| 20:3/18:4 | 1.2±0.1  | > | 0.4±0.0  | = | 0.7±0.3  | = | 0.8±0.2  | > | 0.3±0.2  | < | 1.1±0.6  | = | 0.3±0.1  | = | 0.2±0.1  | = | 0.3±0.1  | =        | 0.2±0.0  | =       | 0.3±0.1  | = | 0.3±0.1  | = | 0.2±0.1  | 0.3±0.2  | 1.2±0.1  | =       | 0.4±0.2  | =       | 0.2±0.0  | = | 0.3±0.2  | = | 0.3±0.2  | = |   |   |
| 20:4/18:3 | 0.4±0.2  | = | 0.2±0.1  | < | 0.3±0.0  | < | 0.5±0.2  | = | 0.3±0.1  | < | 0.9±0.4  | = | 0.4±0.1  | > | 0.2±0.1  | = | 0.2±0.2  | =        | 0.6±0.3  | =       | 0.6±0.3  | = | 1.3±1.0  | = | 0.3±0.0  | 0.6±0.4  | 0.2±0.2  | =       | 1.6±0.8  | =       | 0.4±0.0  | = | 1.3±1.6  | = | 1.3±1.6  | = |   |   |
| 20:5/18:2 | 0.1±0.1  | = | 0.1±0.0  | = | 0.1±0.0  | = | 0.3±0.1  | = | 0.2±0.1  | = | 1.1±1.1  | = | 0.1±0.0  | = | 0.1±0.0  | = | 0.1±0.1  | <        | 0.4±0.2  | =       | 0.3±0.1  | = | 0.8±0.2  | = | 0.1±0.0  | 0.3±0.0  | -        | =       | 0.8±0.8  | =       | +        | = | -        | = | -        | = |   |   |
| 18:3/20:4 | 0.1±0.0  | > | +        | = | 0.1±0.0  | = | 0.1±0.1  | = | 0.1±0.0  | < | 0.8±0.5  | > | 0.1±0.0  | = | +        | = | +        | <        | 0.1±0.0  | =       | 0.1±0.1  | = | 0.2±0.1  | > | 0.1±0.0  | 0.1±0.1  | 0.1±0.0  | =       | 0.6±0.1  | =       | +        | = | 0.3±0.3  | = | 0.3±0.3  | = |   |   |
| 20:3/18:3 | 0.2±0.1  | > | 0.1±0.0  | = | 0.1±0.0  | = | 0.1±0.0  | = | 0.1±0.0  | < | 0.3±0.0  | > | 0.2±0.1  | > | 0.1±0.0  | < | 0.1±0.0  | <        | 0.2±0.0  | =       | 0.2±0.0  | = | 0.2±0.1  | = | 0.1±0.0  | 0.2±0.1  | 0.2±0.1  | =       | 0.3±0.0  | =       | 0.1±0.0  | = | 0.3±0.1  | = | 0.3±0.1  | = |   |   |
| 20:4/18:2 | 0.1±0.1  | = | 0.1±0.0  | = | 0.1±0.0  | < | 0.2±0.1  | = | 0.2±0.1  | < | 0.7±0.4  | > | 0.1±0.0  | = | 0.1±0.0  | = | 0.1±0.0  | <        | 0.2±0.0  | =       | 0.2±0.1  | = | 0.4±0.2  | = | 0.1±0.0  | 0.2±0.1  | 0.1±0.0  | =       | 0.5±0.1  | =       | 0.1±0.0  | = | 0.4±0.1  | = | 0.4±0.1  | = |   |   |
| 20:5/18:1 | +        | = | 0.1±0.0  | = | 0.1±0.0  | = | 0.1±0.1  | = | 0.1±0.0  | = | 0.1±0.1  | = | 0.1±0.0  | = | 0.1±0.0  | = | 0.1±0.0  | =        | 0.2±0.1  | =       | 0.1±0.1  | = | 0.1±0.0  | = | 0.1±0.0  | 0.2±0.1  | 0.1±0.0  | =       | -        | =       | 0.1±0.0  | = | +        | < | +        | < |   |   |
| 20:3/18:2 | 0.1±0.0  | > | 0.1±0.0  | = | 0.1±0.0  | < | 0.2±0.0  | = | 0.2±0.0  | = | 0.2±0.0  | > | 0.1±0.0  | > | 0.1±0.0  | = | 0.1±0.0  | <        | 0.2±0.0  | =       | 0.1±0.0  | = | 0.1±0.0  | = | 0.1±0.0  | 0.1±0.0  | 0.1±0.0  | =       | 0.2±0.0  | =       | 0.1±0.0  | < | 0.1±0.0  | = | 0.1±0.0  | = |   |   |
| 20:4/18:1 | 0.1±0.0  | > | +        | = | +        | < | +        | = | +        | < | 0.1±0.1  | = | +        | = | +        | = | +        | =        | 0.1±0.0  | >       | +        | = | +        | = | 0.1±0.1  | 0.1±0.0  | 0.1±0.0  | =       | 0.1±0.0  | =       | +        | = | +        | = | +        | = |   |   |
| 20:5/18:0 | +        | = | +        | = | +        | = | +        | = | +        | = | +        | = | +        | = | +        | = | +        | >        | +        | <       | +        | = | +        | + | +        | +        | +        | =       | -        | =       | +        | = | +        | < | +        | < |   |   |
| 20:3/18:1 | +        | = | +        | = | +        | = | +        | = | 0.1±0.0  | = | 0.1±0.0  | > | +        | = | +        | = | +        | <        | 0.1±0.0  | =       | +        | = | 0.1±0.0  | = | +        | 0.1±0.0  | 0.1±0.0  | =       | +        | <       | +        | = | +        | = | +        | = |   |   |
| 20:0/18:4 | 0.1±0.0  | > | 0.1±0.0  | = | 0.1±0.0  | = | 0.1±0.0  | > | +        | < | 0.1±0.0  | > | 0.1±0.0  | = | 0.1±0.0  | = | 0.1±0.0  | =        | 0.1±0.0  | =       | 0.1±0.0  | = | 0.1±0.0  | = | +        | +        | 0.1±0.0  | =       | 0.1±0.1  | =       | +        | < | 0.1±0.0  | = | 0.1±0.0  | = |   |   |
| 20:0/18:3 | +        | = | +        | < | +        | = | +        | = | +        | < | +        | > | +        | = | +        | = | +        | =        | +        | =       | +        | = | +        | = | +        | +        | +        | =       | +        | <       | +        | = | +        | = | +        | = |   |   |
| 20:5/20:5 | +        | < | 0.1±0.0  | = | 0.1±0.0  | < | 0.4±0.2  | = | 0.4±0.0  | > | +        | < | 0.2±0.0  | = | 0.2±0.1  | = | 0.2±0.1  | <        | 0.5±0.0  | <       | 0.9±0.2  | > | 0.2±0.1  | < | 0.3±0.0  | 0.5±0.1  | +        | =       | +        | =       | 0.2±0.1  | = | 0.2±0.2  | = | 0.2±0.2  | = |   |   |
| 20:5/20:4 | 0.1±0.0  | > | +        | < | 0.1±0.0  | = | 0.1±0.1  | = | 0.1±0.0  | > | +        | < | 0.2±0.0  | = | 0.1±0.1  | = | 0.1±0.0  | <        | 0.2±0.0  | <       | 0.3±0.1  | > | 0.2±0.0  | = | 0.2±0.0  | 0.2±0.1  | 0.1±0.0  | =       | 0.1±0.0  | =       | 0.3±0.1  | = | 0.2±0.2  | = | 0.2±0.2  | = |   |   |
| 20:4/20:5 | 0.1±0.0  | = | 0.1±0.0  | = | 0.1±0.0  | < | 0.5±0.3  | = | 0.7±0.1  | > | 0.2±0.2  | = | 0.2±0.1  | = | 0.2±0.1  | = | 0.2±0.1  | <        | 1.0±0.1  | <       | 1.6±0.3  | > | 0.8±0.4  | = | 0.5±0.1  | 0.9±0.3  | 0.1±0.0  | =       | 0.3±0.0  | =       | 0.4±0.1  | = | 1.1±0.4  | = | 1.1±0.4  | = |   |   |
| 20:5/20:3 | 0.1±0.0  | = | 0.1±0.0  | = | 0.1±0.0  | < | 0.2±0.1  | = | 0.2±0.0  | > | 0.1±0.0  | < | 0.1±0.0  | = | 0.1±0.0  | = | 0.2±0.1  | =        | 0.3±0.1  | <       | 0.4±0.1  | = | 0.3±0.1  | = | 0.1±0.0  | 0.2±0.1  | 0.1±0.0  | =       | 0.1±0.0  | =       | 0.1±0.0  | = | 0.2±0.0  | = | 0.2±0.0  | = |   |   |
| 20:4/20:4 | +        | = | +        | = | +        | = | 0.1±0.1  | < | 0.2±0.0  | = | 0.5±0.3  | = | 0.1±0.0  | > | 0.1±0.0  | = | 0.1±0.0  | <        | 0.2±0.1  | =       | 0.3±0.0  | < | 1.3±0.9  | > | 0.1±0.1  | 0.7±0.1  | 0.1±0.0  | =       | 0.6±0.1  | =       | 0.2±0.0  | = | 1.2±0.1  | = | 1.2±0.1  | = |   |   |
| 20:4/20:3 | -        | = | -        | = | -        | < | +        | > | -        | < | +        | = | +        | > | -        | = | -        | <        | +        | =       | +        | > | +        | > | -        | +        | -        | =       | -        | =       | -        | = | -        | = | -        | = |   |   |
| SFA/SFA   | +        | > | +        | = | +        | = | +        | = | +        | < | 0.1±0.0  | > | +        | = | +        | > | +        | =        | +        | =       | +        | < | +        | > | 0.1±0.0  | 0.1±0.1  | 0.1±0.0  | >       | 0.1±0.1  | =       | 0.1±0.0  | = | +        | = | +        | = |   |   |
| SFA/MUFA  | 5.5±1.0  | > | 3.8±0.5  | = | 3.4±0.6  | < | 6.1±0.8  | > | 5.0±0.3  | = | 5.0±2.3  | = | 4.7±0.1  | = | 4.5±0.3  | > | 3.7±0.5  | <        | 5.8±0.6  | >       | 3.5±0.3  | > | 2.4±0.8  | < | 5.8±0.4  | 3.5±0.8  | 6.6±0.5  | =       | 4.0±0.1  | =       | 6.5±0.4  | = | 2.1±0.7  | = | 2.1±0.7  | = |   |   |
| MUFA/SFA  | -        | = | -        | = | -        | = | -        | = | -        | = | -        | = | -        | = | -        | = | -        | =        | -        | =       | -        | = | -        | = | -        | -        | -        | =       | -        | =       | -        | = | -        | = | -        | = |   |   |
| SFA/PUFA  | 15.4±1.5 | > | 12.9±1.5 | = | 13.4±1.7 | = | 13.1±4.3 | = | 15.7±0.5 | > | 8.9±1.9  | = | 10.9±0.4 | = | 9.4±1.5  | = | 7.8±1.1  | =        | 6.6±0.9  | <       | 8.4±0.5  | = | 7.7±1.5  | = | 10.7±1.4 | 9.0±0.7  | 16.4±1.4 | =       | 7.5±0.0  | =       | 12.2±0.2 | > | 7.7±1.0  | = | 7.7±1.0  | = |   |   |
| PUFA/SFA  | 0.2±0.0  | = | 0.1±0.1  | = | 0.1±0.0  | < | 0.3±0.0  | = | 0.3±0.0  | = | 0.3±0.1  | = | 0.2±0.1  | = | 0.3±0.0  | = | 0.2±0.0  | =        | 0.2±0.0  | =       | 0.3±0.1  | = | 0.3±0.1  | = | 0.5±0.1  | 0.6±0.3  | 0.2±0.0  | =       | 0.2±0.0  | =       | 0.4±0.1  | = | 0.3±0.0  | = | 0.3±0.0  | = |   |   |
| MUFA/MUFA | 0.3±0.1  | = | 0.2±0.0  | > | 0.1±0.0  | < | 0.3±0.0  | > | 0.2±0.1  | = | 0.1±0.1  | < | 0.1±0.0  | < | 0.2±0.0  | = | 0.2±0.1  | =        | 0.2±0.0  | >       | 0.1±0.0  | = | 0.1±0.0  | < | 0.3±0.0  | 0.2±0.1  | 0.3±0.0  | =       | 0.1±0.0  | =       | 0.3±0.0  | > | 0.1±0.0  | = | 0.1±0.0  | = |   |   |

|           |          |   |          |   |          |   |          |   |          |   |          |   |          |   |          |   |          |   |          |   |          |   |          |   |          |          |          |   |          |   |          |   |          |   |
|-----------|----------|---|----------|---|----------|---|----------|---|----------|---|----------|---|----------|---|----------|---|----------|---|----------|---|----------|---|----------|---|----------|----------|----------|---|----------|---|----------|---|----------|---|
| MUFA/PUFA | 1.4±0.5  | < | 2.1±0.3  | = | 2.4±0.3  | = | 2.3±0.4  | > | 1.7±0.2  | = | 1.5±0.3  | < | 1.5±0.2  | < | 2.1±0.2  | > | 1.7±0.2  | = | 1.6±0.2  | = | 1.4±0.2  | > | 0.8±0.2  | < | 1.4±0.4  | 1.1±0.2  | 2.0±0.1  | = | 1.3±0.1  | = | 1.9±0.1  | = | 0.9±0.3  | = |
| PUFA/MUFA | 1.1±0.3  | = | 0.9±0.1  | = | 0.7±0.2  | = | 1.2±0.5  | = | 0.9±0.1  | < | 1.5±0.4  | = | 1.2±0.3  | = | 1.2±0.1  | = | 1.1±0.2  | < | 1.5±0.2  | > | 1.0±0.0  | > | 0.9±0.1  | < | 2.3±1.4  | 1.5±0.1  | 1.3±0.2  | = | 1.4±0.4  | = | 1.2±0.2  | = | 0.8±0.0  | = |
| PUFA/PUFA | 76.1±2.0 | < | 80.0±2.0 | = | 80.0±2.2 | = | 76.8±3.1 | = | 76.4±0.2 | < | 82.7±4.7 | = | 81.3±0.6 | = | 82.3±1.6 | < | 85.3±1.2 | = | 84.1±1.6 | = | 85.3±0.4 | = | 88.0±2.4 | > | 79.1±1.5 | 84.1±1.0 | 73.2±2.3 | = | 85.4±0.5 | = | 77.6±0.7 | < | 88.0±1.3 | = |

| DGDG      | The lower part of the blades of infected <i>U. pinnatifida</i> samples |      |         |      |          |      |         | The upper intact part of the blades of infected <i>U. pinnatifida</i> samples |         |      |         |      |         |   | The upper part of the blades of infected <i>U. pinnatifida</i> samples with endophyte | The lower part of the blades of uninfected <i>U. pinnatifida</i> samples |         | The upper part of the blades of uninfected <i>U. pinnatifida</i> samples |         |      |         |      |         |      |         |         |
|-----------|------------------------------------------------------------------------|------|---------|------|----------|------|---------|-------------------------------------------------------------------------------|---------|------|---------|------|---------|---|---------------------------------------------------------------------------------------|--------------------------------------------------------------------------|---------|--------------------------------------------------------------------------|---------|------|---------|------|---------|------|---------|---------|
|           | Nov.                                                                   | Dec. | Jan.    | Feb. | Apr.     | Jun. | T       | Nov.                                                                          | Dec.    | Jan. | Feb.    | Apr. | Jun.    | T |                                                                                       | Nov.                                                                     | Jun.    | Nov.                                                                     | S       | Jun. | S       | Nov. | S       | Jun. | S       |         |
| 14:0/16:2 | +                                                                      | =    | +       | =    | +        | =    | +       | =                                                                             | +       | =    | +       | =    | +       | = | 0.1±0.0                                                                               | =                                                                        | +       | +                                                                        | +       | =    | -       | =    | 0.1±0.0 | =    | 0.1±0.0 | =       |
| 14:0/16:1 | 0.1±0.0                                                                | =    | +       | =    | +        | =    | +       | =                                                                             | 0.1±0.0 | =    | 0.1±0.0 | =    | 0.1±0.0 | = | 0.1±0.0                                                                               | =                                                                        | 0.3±0.2 | 0.1±0.0                                                                  | 0.1±0.0 | =    | 0.2±0.0 | =    | 0.5±0.0 | >    | 0.1±0.1 | =       |
| 14:0/16:0 | 0.1±0.0                                                                | >    | -       | =    | -        | <    | +       | =                                                                             | +       | =    | +       | =    | +       | > | -                                                                                     | <                                                                        | 0.1±0.0 | 0.1±0.0                                                                  | 0.1±0.0 | =    | 0.1±0.0 | =    | 0.1±0.1 | =    | +       | =       |
| 16:1/16:4 | 0.1±0.0                                                                | >    | +       | =    | +        | =    | 0.1±0.0 | =                                                                             | +       | =    | 0.1±0.2 | =    | 0.1±0.1 | = | +                                                                                     | =                                                                        | 0.1±0.1 | 0.2±0.0                                                                  | +       | =    | -       | =    | 0.1±0.1 | =    | +       | =       |
| 16:2/16:2 | +                                                                      | =    | +       | =    | +        | =    | 0.1±0.0 | =                                                                             | +       | >    | -       | <    | +       | = | 0.1±0.0                                                                               | >                                                                        | +       | =                                                                        | +       | >    | +       | >    | -       | <    | +       | =       |
| 16:3/16:1 | +                                                                      | >    | -       | =    | -        | <    | +       | =                                                                             | +       | >    | -       | <    | +       | = | -                                                                                     | =                                                                        | +       | =                                                                        | +       | >    | +       | <    | 0.2±0.0 | >    | +       | =       |
| 14:0/18:4 | 2.0±0.4                                                                | =    | 2.7±1.0 | <    | 4.8±0.8  | =    | 3.8±1.7 | =                                                                             | 3.0±0.2 | >    | 0.5±0.1 | <    | 1.9±0.1 | = | 2.0±0.5                                                                               | =                                                                        | 2.0±0.3 | >                                                                        | 1.3±0.5 | =    | 1.0±0.2 | =    | 0.6±0.4 | =    | 1.7±0.4 | 0.4±0.2 |
| 16:1/16:2 | +                                                                      | >    | -       | <    | +        | =    | +       | =                                                                             | +       | >    | -       | <    | -       | = | -                                                                                     | =                                                                        | +       | =                                                                        | 1.2±1.6 | =    | +       | <    | 0.1±0.0 | =    | +       | =       |
| 14:0/18:3 | 4.0±1.3                                                                | >    | 1.4±0.7 | <    | 2.6±0.2  | =    | 2.8±0.6 | =                                                                             | 3.7±0.6 | =    | 3.6±0.7 | =    | 6.4±0.9 | > | 3.7±0.9                                                                               | =                                                                        | 3.8±0.4 | >                                                                        | 2.1±0.3 | =    | 2.5±0.6 | =    | 4.1±2.0 | =    | 5.5±0.5 | 3.3±0.4 |
| 16:1/16:1 | +                                                                      | =    | +       | >    | +        | <    | +       | >                                                                             | +       | >    | -       | <    | 0.1±0.1 | = | +                                                                                     | =                                                                        | +       | =                                                                        | +       | =    | -       | <    | 0.2±0.0 | >    | 0.2±0.1 | 0.2±0.2 |
| 14:0/18:2 | 0.4±0.1                                                                | >    | 0.2±0.1 | =    | 0.3±0.2  | <    | 0.8±0.1 | =                                                                             | 0.7±0.1 | =    | 1.2±0.8 | =    | 0.3±0.0 | < | 0.4±0.0                                                                               | =                                                                        | 0.3±0.1 | =                                                                        | 0.3±0.1 | =    | 0.4±0.2 | =    | 0.6±0.3 | =    | 0.5±0.2 | 0.6±0.0 |
| 14:0/18:1 | 0.3±0.1                                                                | =    | 0.1±0.0 | =    | 0.1±0.1  | =    | 0.2±0.1 | =                                                                             | 0.1±0.0 | <    | 0.6±0.2 | >    | 0.2±0.1 | = | 0.2±0.1                                                                               | =                                                                        | 0.1±0.0 | <                                                                        | 0.3±0.1 | =    | 0.2±0.0 | =    | 0.3±0.1 | =    | 0.6±0.0 | 0.5±0.1 |
| 16:0/16:1 | +                                                                      | >    | -       | =    | -        | <    | +       | =                                                                             | +       | =    | +       | =    | -       | = | -                                                                                     | =                                                                        | -       | =                                                                        | -       | =    | -       | =    | -       | =    | 0.1±0.0 | -       |
| 16:0/16:0 | -                                                                      | =    | -       | =    | -        | =    | -       | =                                                                             | -       | =    | -       | =    | -       | = | -                                                                                     | =                                                                        | -       | =                                                                        | -       | =    | -       | =    | -       | =    | -       | -       |
| 15:0/18:4 | +                                                                      | =    | 0.1±0.0 | =    | 0.1±0.0  | =    | 0.1±0.1 | =                                                                             | +       | <    | 0.2±0.0 | =    | 0.1±0.0 | = | 0.1±0.0                                                                               | =                                                                        | 0.1±0.0 | =                                                                        | 0.1±0.0 | =    | 0.1±0.0 | =    | 0.1±0.0 | =    | 0.1±0.0 | 0.1±0.0 |
| 15:0/18:3 | 0.1±0.0                                                                | >    | 0.1±0.0 | =    | 0.1±0.0  | =    | 0.1±0.0 | <                                                                             | 0.1±0.0 | =    | 0.1±0.0 | =    | 0.2±0.0 | = | 0.1±0.0                                                                               | =                                                                        | 0.1±0.1 | >                                                                        | +       | <    | 0.1±0.0 | <    | 0.4±0.1 | >    | 0.2±0.0 | 0.3±0.1 |
| 15:0/18:2 | -                                                                      | =    | -       | <    | +        | =    | +       | >                                                                             | +       | >    | -       | <    | 0.1±0.0 | > | -                                                                                     | <                                                                        | +       | =                                                                        | +       | =    | +       | >    | -       | <    | +       | 0.1±0.0 |
| 18:3/16:2 | +                                                                      | =    | +       | <    | 0.1±0.0  | =    | 0.2±0.1 | >                                                                             | 0.1±0.0 | =    | +       | <    | +       | < | 0.1±0.0                                                                               | <                                                                        | 0.1±0.0 | =                                                                        | 0.1±0.0 | <    | 0.3±0.1 | =    | 0.2±0.1 | =    | +       | 0.2±0.0 |
| 16:2/18:3 | -                                                                      | =    | -       | =    | -        | <    | 0.3±0.0 | >                                                                             | -       | =    | -       | <    | -       | = | -                                                                                     | =                                                                        | -       | <                                                                        | 0.3±0.0 | =    | 0.4±0.0 | >    | -       | <    | -       | -       |
| 16:1/18:4 | 0.1±0.0                                                                | <    | 0.2±0.0 | =    | 0.2±0.1  | =    | 0.2±0.1 | =                                                                             | 0.2±0.0 | =    | 0.2±0.1 | =    | 0.2±0.0 | < | 0.3±0.1                                                                               | =                                                                        | 0.4±0.1 | =                                                                        | 0.4±0.2 | =    | 0.5±0.2 | >    | +       | <    | 0.1±0.0 | 0.1±0.0 |
| 20:5/14:0 | 0.1±0.0                                                                | =    | +       | =    | 0.1±0.0  | =    | 0.1±0.0 | =                                                                             | +       | =    | 0.1±0.0 | =    | +       | = | +                                                                                     | =                                                                        | +       | =                                                                        | +       | =    | +       | =    | +       | =    | 0.1±0.0 | 0.1±0.0 |
| 16:1/18:3 | 0.1±0.1                                                                | =    | 0.2±0.1 | <    | 0.3±0.0  | <    | 0.7±0.3 | >                                                                             | 0.2±0.0 | >    | 0.1±0.1 | <    | 0.3±0.2 | = | 0.5±0.1                                                                               | =                                                                        | 0.6±0.0 | =                                                                        | 0.8±0.1 | =    | 0.7±0.2 | >    | 0.3±0.1 | <    | 0.2±0.0 | 0.1±0.0 |
| 18:1/16:3 | +                                                                      | =    | +       | =    | +        | =    | +       | =                                                                             | +       | <    | 0.1±0.0 | =    | +       | = | +                                                                                     | =                                                                        | +       | =                                                                        | +       | =    | +       | =    | 0.1±0.0 | >    | 0.1±0.0 | 0.1±0.0 |
| 20:4/14:0 | -                                                                      | =    | -       | =    | -        | <    | +       | >                                                                             | -       | <    | 0.2±0.0 | >    | -       | = | -                                                                                     | =                                                                        | -       | <                                                                        | +       | =    | +       | <    | 0.3±0.0 | >    | -       | -       |
| 16:0/18:4 | 3.0±0.2                                                                | <    | 6.3±1.3 | <    | 11.2±1.5 | =    | 9.5±4.4 | =                                                                             | 6.1±0.3 | >    | 1.3±0.6 | <    | 2.3±0.1 | < | 3.7±1.2                                                                               | =                                                                        | 3.6±0.8 | >                                                                        | 1.9±0.9 | =    | 1.9±0.4 | >    | 0.6±0.3 | <    | 2.4±0.1 | 1.4±0.4 |
| 16:1/18:2 | +                                                                      | >    | +       | =    | +        | =    | 0.1±0.0 | =                                                                             | 1.6±2.7 | =    | +       | =    | +       | = | +                                                                                     | =                                                                        | +       | <                                                                        | 0.1±0.0 | =    | 0.1±0.1 | >    | -       | <    | 3.1±4.4 | -       |
| 14:0/20:3 | +                                                                      | >    | -       | =    | -        | <    | +       | >                                                                             | -       | =    | -       | <    | -       | = | -                                                                                     | <                                                                        | +       | =                                                                        | +       | >    | -       | =    | -       | <    | -       | -       |
| 16:0/18:3 | 4.9±1.1                                                                | >    | 2.7±0.6 | <    | 3.9±0.2  | <    | 6.0±0.5 | =                                                                             | 5.0±0.9 | =    | 4.5±0.4 | <    | 5.3±0.5 | = | 4.7±0.5                                                                               | <                                                                        | 6.0±0.6 | >                                                                        | 4.1±0.6 | =    | 4.3±0.4 | =    | 4.6±1.0 | =    | 6.7±0.6 | 6.4±1.3 |
| 16:1/18:1 | -                                                                      | =    | -       | <    | +        | =    | +       | >                                                                             | -       | =    | -       | <    | +       | > | -                                                                                     | <                                                                        | +       | =                                                                        | +       | =    | +       | >    | -       | <    | 0.1±0.1 | -       |
| 16:0/18:2 | 0.3±0.0                                                                | >    | 0.1±0.0 | =    | 0.3±0.1  | <    | 0.6±0.1 | =                                                                             | 0.7±0.2 | =    | 0.8±0.3 | =    | 0.3±0.2 | = | 0.4±0.1                                                                               | =                                                                        | 0.4±0.0 | <                                                                        | 0.6±0.1 | =    | 0.6±0.1 | =    | 0.7±0.3 | =    | 0.6±0.1 | 1.1±0.4 |
| 16:0/18:1 | 0.1±0.1                                                                | =    | 0.2±0.1 | =    | 0.1±0.0  | <    | 0.3±0.1 | =                                                                             | 0.2±0.0 | =    | 0.4±0.3 | =    | 0.3±0.0 | > | 0.2±0.0                                                                               | <                                                                        | 0.3±0.1 | =                                                                        | 0.5±0.2 | >    | 0.3±0.0 | =    | 0.5±0.2 | =    | 1.2±0.3 | 1.3±0.5 |
| 18:5/18:4 | +                                                                      | =    | 0.1±0.1 | =    | 0.2±0.1  | =    | 0.1±0.1 | =                                                                             | 0.1±0.0 | >    | -       | <    | +       | < | 0.4±0.2                                                                               | >                                                                        | 0.1±0.1 | =                                                                        | 0.1±0.1 | =    | 0.1±0.1 | =    | 0.2±0.1 | =    | 0.1±0.1 | 0.1±0.0 |

|            |                                                                   |                                                              |                  |            |            |            |            |   |   |
|------------|-------------------------------------------------------------------|--------------------------------------------------------------|------------------|------------|------------|------------|------------|---|---|
| 20:5/16:4  | 0.1±0.0 = + = + = + > - < + =                                     | - < 0.1±0.0 = 0.1±0.0 = 0.1±0.1 = + > - =                    | - 0.1±0.0        | - =        | - =        | +          | =          | - | = |
| 18:4/18:4  | 2.3±0.5 = 2.4±0.3 = 2.5±0.3 = 2.0±0.3 > 1.3±0.1 = 1.1±0.5 <       | 2.8±0.5 < 4.0±0.5 = 4.3±0.5 = 3.5±0.9 = 2.6±0.1 > 1.9±0.3 <  | 3.5±0.3 2.7±0.2  | 1.7±0.1 =  | 0.9±0.5 =  | 3.2±0.3 =  | 2.6±1.0 =  |   |   |
| 20:5/16:3  | + = + = + > - < + = + >                                           | + = + > + = + < + > - <                                      | + +              | - =        | - =        | - =        | + =        |   |   |
| 18:3/18:4  | 1.1±0.4 = 1.1±0.3 = 1.1±0.7 = 1.0±0.5 = 0.8±0.4 = 1.0±0.6 =       | 1.7±0.7 = 3.2±1.2 = 4.3±0.7 = 4.4±1.3 = 3.3±0.4 > 1.9±1.0 <  | 3.5±1.5 2.0±2.3  | 0.8±0.3 =  | 0.3±0.2 =  | 5.3±0.6 >  | 4.0±1.5 =  |   |   |
| 20:5/16:2  | 0.3±0.2 > - < 0.4±0.1 = 0.4±0.2 = 0.1±0.1 = 0.5±0.4 =             | 1.2±0.5 > - = - < 0.2±0.2 = 0.1±0.0 < 2.6±0.4 >              | 2.1±0.0 2.9±0.5  | 0.4±0.1 =  | 0.9±0.4 =  | - =        | 0.5±0.0 =  |   |   |
| 16:3/20:4  | 0.1±0.0 = 0.1±0.1 = 0.1±0.0 = 0.1±0.1 = 0.1±0.1 = 0.2±0.2 =       | 0.1±0.0 = 0.1±0.1 = 0.1±0.0 = 0.1±0.1 = 0.1±0.0 = 0.1±0.0 =  | 0.3±0.0 0.1±0.0  | 0.2±0.0 =  | - =        | 0.2±0.1 =  | 0.1±0.1 =  |   |   |
| 18:3/18:3  | 0.6±0.2 < 1.3±0.5 = 1.8±0.4 = 1.8±1.2 = 1.2±0.2 = 1.1±0.6 =       | 2.0±0.4 < 4.0±1.0 < 5.9±0.4 = 5.1±1.1 = 5.2±1.0 = 4.9±1.1 =  | 2.6±0.1 3.1±0.7  | 0.7±0.2 =  | 1.0±0.4 =  | 2.8±0.6 =  | 3.8±1.7 =  |   |   |
| 18:3/18:3  | + < 0.1±0.0 = 0.2±0.0 > - < 0.1±0.0 = 0.1±0.1 >                   | 0.1±0.0 = 0.2±0.1 = 0.2±0.1 > - < 0.1±0.0 = 0.3±0.3 >        | 0.1±0.0 0.1±0.0  | 0.1±0.0 =  | 0.1±0.0 =  | 0.1±0.1 =  | 0.1±0.1 =  |   |   |
| 20:5/16:1  | 0.3±0.2 = 0.1±0.1 = 0.1±0.0 = 0.2±0.1 = 0.1±0.0 < 0.4±0.1 >       | 0.1±0.0 = 0.1±0.1 = 0.2±0.0 = 0.3±0.1 > + = 0.3±0.2 =        | 0.1±0.1 0.3±0.1  | 0.1±0.0 =  | 0.2±0.0 =  | 0.3±0.1 =  | 0.3±0.0 =  |   |   |
| 18:5/18:1  | + = + = + = 0.1±0.1 = 0.1±0.0 = 0.1±0.0 =                         | + = + < 0.1±0.0 < 0.2±0.0 > + < 0.3±0.0 =                    | 0.1±0.2 0.1±0.1  | + =        | - =        | +          | +          |   |   |
| 18:3/18:2  | 0.1±0.1 = 0.2±0.1 = 0.2±0.1 = 0.6±0.3 = 0.5±0.1 = 0.7±0.4 =       | 0.3±0.1 = 0.4±0.2 < 0.7±0.1 < 1.6±0.6 = 1.1±0.4 = 0.8±0.8 =  | 0.4±0.1 0.8±0.4  | 0.1±0.0 =  | 0.5±0.0 =  | 0.4±0.1 =  | 0.8±0.3 =  |   |   |
| 20:4/16:1  | + = 0.1±0.0 = + = + = + < 0.2±0.1 >                               | 0.1±0.1 = 0.1±0.0 = 0.1±0.0 = + = 0.1±0.0 = 0.1±0.1 =        | + 0.1±0.0        | + =        | 0.2±0.0 =  | +          | 0.1±0.0 =  |   |   |
| 20:5/16:0  | 0.3±0.2 = 0.1±0.1 = 0.2±0.1 = 0.2±0.1 = 0.2±0.1 < 0.7±0.3 >       | 0.3±0.1 = 0.4±0.1 = 0.3±0.1 = 0.3±0.1 = 0.5±0.1 = 0.4±0.1 =  | 0.7±0.1 0.4±0.3  | 0.3±0.0 =  | 0.6±0.2 =  | 0.5±0.0 =  | 0.5±0.1 =  |   |   |
| 18:2/18:2  | 0.1±0.0 = 0.1±0.0 = 0.1±0.0 < 0.3±0.0 = 0.2±0.2 = 0.2±0.1 =       | 0.1±0.0 < 0.1±0.0 < 0.2±0.0 < 0.6±0.1 = 0.4±0.2 = 0.2±0.1 <  | 0.1±0.1 0.3±0.3  | 0.1±0.0 =  | 0.2±0.2 =  | 0.2±0.0 >  | 0.2±0.0 =  |   |   |
| 18:1/18:3  | 0.1±0.0 = 0.1±0.0 = 0.1±0.0 = 0.1±0.0 = 0.1±0.1 = + =             | 0.1±0.1 < 0.2±0.0 = 0.2±0.1 = 0.2±0.1 = 0.2±0.1 > 0.1±0.0 =  | 0.2±0.1 0.2±0.1  | 0.1±0.0 =  | 0.3±0.0 =  | 0.1±0.0 =  | 0.1±0.0 =  |   |   |
| 16:0/20:4  | + = + = + = 0.1±0.0 = + = 0.1±0.1 =                               | 0.1±0.0 = + = + = + = + < 0.2±0.1 >                          | 0.2±0.0 0.4±0.3  | + =        | - =        | 0.1±0.0 =  | 0.2±0.0 =  |   |   |
| 20:4/16:0  | 0.1±0.0 > - = - < + = + < 0.3±0.2 >                               | + = - = + = + = + < 0.1±0.1 >                                | + 0.2±0.0        | + =        | 0.4±0.2 =  | +          | 0.2±0.0 =  |   |   |
| 18:0/18:4  | 0.5±0.1 = 0.7±0.2 = 0.5±0.0 = 0.6±0.3 = 0.5±0.1 > 0.2±0.0 <       | 0.4±0.1 = 0.6±0.2 = 0.5±0.1 > 0.2±0.1 = 0.2±0.1 = 0.2±0.1 =  | 0.4±0.1 0.3±0.1  | 0.5±0.2 =  | 0.1±0.0 =  | 0.3±0.1 =  | 0.1±0.0 =  |   |   |
| 18:2/18:1  | + = - < + = 0.1±0.1 = + = 0.1±0.0 =                               | - = - = + < 0.1±0.0 > 0.1±0.0 = + <                          | 0.1±0.0 0.1±0.1  | + =        | 0.1±0.0 =  | 0.1±0.0 =  | +          |   |   |
| 18:0/18:3  | 0.3±0.1 > 0.1±0.0 = 0.1±0.0 < 0.2±0.1 = 0.2±0.1 < 0.5±0.2 >       | 0.4±0.2 = 0.3±0.1 = 0.3±0.1 = 0.2±0.0 > 0.2±0.0 < 0.8±0.4 >  | 0.5±0.1 0.3±0.0  | 0.4±0.0 =  | 0.5±0.1 =  | 0.4±0.2 =  | 0.5±0.0 =  |   |   |
| 18:1/18:1  | + > - = - < + = + = + <                                           | + = - = + = + = + = 0.1±0.1 =                                | + 0.1±0.0        | + =        | - =        | +          | 0.1±0.0 =  |   |   |
| 18:0/18:2  | + > - < + = + = + = 0.1±0.0 >                                     | + = - = - = - < + > - =                                      | + +              | + =        | 0.2±0.0 =  | +          | +          |   |   |
| 18:0/18:1  | 0.1±0.0 > - < + = + > + = 0.1±0.1 =                               | + > - = + = + = + = + =                                      | 0.1±0.1 0.1±0.0  | + =        | 0.1±0.0 =  | +          | 0.1±0.0 =  |   |   |
| 18:2/19:2  | - = - = - = - = - = - =                                           | + > - < + < 0.1±0.0 = 0.1±0.0 = 0.1±0.0 =                    | 0.2±0.1 0.5±0.4  | - =        | - =        | 0.1±0.1 =  | 0.1±0.2 =  |   |   |
| 18:3/19:1  | - = - = - = - = - = - =                                           | - = - = - < + = + > - <                                      | - -              | - =        | - =        | - =        | +          |   |   |
| 20:5/18:5  | + = 0.1±0.0 = + > - < + > - =                                     | + = + > - < + = + = + =                                      | + -              | + =        | - =        | +          | +          |   |   |
| 20:5/18:4  | 67.2±3.5 = 73.2±4.6 > 61.1±1.9 = 55.5±4.7 = 61.3±2.3 > 50.7±3.6 = | 62.0±1.1=63.6±4.2=58.2±2.3=60.4±0.6 = 62.7±5.0 > 49.0±2.7 <  | 57.0±2.856.7±3.7 | 65.2±1.9 = | 45.8±6.0 = | 56.2±2.2 = | 50.5±5.4 = |   |   |
| 20:5/18:3  | 1.6±0.5 > 1.0±0.2 > 0.7±0.1 < 1.5±0.2 = 1.1±0.3 < 2.5±0.4 >       | 1.4±0.5 = 1.0±0.3 = 1.1±0.2 < 1.4±0.1 = 1.6±0.2 < 7.4±4.6 >  | 1.6±0.3 4.7±1.0  | 1.2±0.2 =  | 1.4±0.1 <  | 2.0±0.1 =  | 4.9±0.3 =  |   |   |
| 20:4/18:4  | 8.6±0.8 > 4.6±0.2 < 6.3±1.0 < 8.8±0.8 = 9.6±0.9 < 23.4±1.4 >      | 8.2±0.8 > 4.1±0.5 = 4.6±0.8 < 6.7±1.2 = 7.2±1.1 = 12.1±4.5 > | 4.6±0.3 7.2±3.3  | 8.8±0.4 =  | 30.0±6.4 = | 6.3±0.0 =  | 14.5±7.5 = |   |   |
| 20:4/18:3  | 0.5±0.1 > 0.2±0.1 = 0.1±0.1 < 0.5±0.1 > 0.3±0.1 < 1.7±0.9 >       | 0.6±0.1 > 0.2±0.0 > 0.1±0.1 < 0.5±0.1 > 0.3±0.0 < 3.5±1.3 >  | 0.4±0.1 1.1±0.6  | 0.5±0.0 =  | 3.0±0.3 =  | 0.5±0.3 =  | 2.5±1.1 =  |   |   |
| 20:5/18:2  | 0.2±0.1 = + = 0.1±0.1 = 0.1±0.0 = 0.1±0.0 = 0.8±0.5 >             | - < + = 0.1±0.1 = 0.1±0.0 = 0.3±0.3 = 0.1±0.0 =              | 0.1±0.0 0.4±0.0  | + =        | 0.5±0.4 =  | 0.1±0.1 =  | 0.2±0.1 =  |   |   |
| 18:3/20:4  | 0.1±0.1 = + = 0.1±0.1 = + = 0.1±0.1 = 0.5±0.6 =                   | - < + = + = + = + < + =                                      | 0.1±0.0 0.1±0.1  | + =        | 0.6±0.3 =  | +          | +          |   |   |
| 20:4/18:2  | 0.1±0.0 > + = + = + = + = 0.1±0.1 =                               | + = + = + = + = + < 0.2±0.1 >                                | 0.1±0.0 0.1±0.1  | + =        | - =        | +          | +          |   |   |
| 20:5/18:1  | + > - < + = + = + < 0.2±0.1 >                                     | + = - < + = + = + = 0.2±0.3 =                                | + 0.1±0.1        | + =        | 0.4±0.2 =  | 0.1±0.0 =  | 0.1±0.0 =  |   |   |
| SFA/SFA    | 0.1±0.0 > + = + = + = + = 0.1±0.1 =                               | + = + = + = + = + = + =                                      | + +              | 0.1±0.0 =  | 0.1±0.0 =  | 0.1±0.1 =  | 0.1±0.0 =  |   |   |
| SFA/MUFA   | 0.4±0.2 = 0.3±0.2 = 0.3±0.1 < 0.5±0.2 = 0.4±0.0 < 1.1±0.5 =       | 0.7±0.2 = 0.5±0.1 = 0.5±0.1 = 0.9±0.3 = 0.6±0.1 = 0.7±0.4 =  | 2.1±0.3 1.8±0.6  | 0.5±0.0 =  | 0.8±0.3 =  | 1.6±0.0 >  | 0.6±0.4 =  |   |   |
| MUFA/SFA   | - = - = - = - = - = - =                                           | - = - = - = - = - = - =                                      | - -              | - =        | - =        | - =        | - =        |   |   |
| SFA/PUFA   | 15.7±3.1 = 14.3±3.9 < 23.9±2.2 = 24.5±6.6 = 20.1±1.6 > 12.8±0.7 < | 17.8±1.0=15.9±1.8=17.2±1.7>10.8±2.5 = 11.3±1.5 = 12.9±3.3 =  | 18.7±1.014.5±0.9 | 18.9±1.2 = | 11.2±0.5 = | 18.2±1.1 = | 12.9±1.9 = |   |   |
| PUFA/SFA   | 0.4±0.2 > 0.1±0.1 < 0.3±0.1 = 0.3±0.1 = 0.3±0.1 < 1.1±0.2 >       | 0.4±0.1 = 0.5±0.1 = 0.4±0.0 = 0.4±0.1 < 0.5±0.1 = 0.6±0.2 >  | 0.8±0.1 0.4±0.3  | 0.3±0.0 =  | 1.2±0.1 =  | 0.6±0.1 =  | 0.6±0.2 =  |   |   |
| MUFA/MUFA  | + = + = + < + > + = + <                                           | 0.1±0.1 = + = + = + = + < 0.1±0.1 =                          | 0.2±0.1 0.2±0.1  | + =        | +          | 0.3±0.0 >  | 0.1±0.1 =  |   |   |
| MUFA/PUFA  | 0.4±0.2 = 0.5±0.1 = 0.6±0.1 < 1.1±0.2 = 2.1±2.6 = 0.4±0.1 <       | 0.7±0.2 < 1.2±0.2 < 1.4±0.0 = 2.3±1.1 = 1.5±0.5 > 0.5±0.1 <  | 2.7±3.8 0.5±0.3  | 0.4±0.0 =  | 0.7±0.2 =  | 0.9±0.3 =  | 0.5±0.1 =  |   |   |
| PUFA/ MUFA | + = + = + = 0.1±0.1 = + = 0.2±0.2 =                               | + < + = 0.1±0.0 < 0.2±0.1 = 0.1±0.0 = 0.2±0.2 =              | 0.1±0.1 0.2±0.0  | + =        | 0.5±0.2 =  | 0.1±0.0 =  | 0.1±0.0 =  |   |   |
| PUFA/PUFA  | 83.1±3.6 = 84.8±4.1 > 74.9±2.1 = 73.5±6.2 = 77.1±2.4 < 84.5±1.3 > | 80.4±1.5=81.9±2.0=80.4±1.8<85.5±3.2 = 86.0±2.0 = 85.0±3.4 =  | 75.4±2.782.3±1.4 | 79.8±1.1 = | 85.6±0.3 = | 78.3±1.3 = | 85.3±1.7 = |   |   |



| SQDG       | The lower part of the blades of infected <i>U. pinnatifida</i> samples |            |            |            |            |           |           | The upper intact part of the blades of infected <i>U. pinnatifida</i> samples |           |           |           |           |            |            | The upper part of the blades of infected <i>U. pinnatifida</i> samples with endophyte |           | The lower part of the blades of uninfected <i>U. pinnatifida</i> samples |         |            |          | The upper part of the blades of uninfected <i>U. pinnatifida</i> samples |          |          |         |          |         |          |         |          |   |
|------------|------------------------------------------------------------------------|------------|------------|------------|------------|-----------|-----------|-------------------------------------------------------------------------------|-----------|-----------|-----------|-----------|------------|------------|---------------------------------------------------------------------------------------|-----------|--------------------------------------------------------------------------|---------|------------|----------|--------------------------------------------------------------------------|----------|----------|---------|----------|---------|----------|---------|----------|---|
|            | Nov.                                                                   | Dec.       | Jan.       | Feb.       | Apr.       | Jun.      | T         | Nov.                                                                          | Dec.      | Jan.      | Feb.      | Apr.      | Jun.       | T          | Nov.                                                                                  | Jun.      | Nov.                                                                     | S       | Jun.       | S        | Nov.                                                                     | S        | Jun.     | S       |          |         |          |         |          |   |
| 14:0/14:0  | 0.7±0.2                                                                | > 0.2±0.1  | = 0.1±0.0  | < 0.3±0.1  | = 0.2±0.2  | < 0.5±0.1 | =         | 1.1±0.6                                                                       | = 0.8±0.3 | > 0.2±0.1 | < 0.4±0.2 | > 0.1±0.0 | < 0.9±0.5  | =          | 1.5±0.8                                                                               | 1.2±0.2   | 0.7±0.2                                                                  | =       | 0.9±0.2    | =        | 3.7±0.3                                                                  | >        | 0.7±0.2  | =       |          |         |          |         |          |   |
| 14:0/16:2  | 0.1±0.0                                                                | = 0.3±0.4  | = 0.2±0.1  | = 0.1±0.1  | = 0.1±0.1  | = 0.1±0.1 | =         | 0.1±0.1                                                                       | = 0.5±0.4 | = 0.3±0.1 | = 0.2±0.0 | = 0.2±0.1 | = 0.2±0.0  | =          | 0.1±0.0                                                                               | 0.2±0.2   | 0.2±0.1                                                                  | =       | 0.2±0.0    | =        | 0.3±0.0                                                                  | >        | +        | =       |          |         |          |         |          |   |
| 14:0/16:1  | 0.5±0.2                                                                | = 0.2±0.0  | = 0.4±0.2  | = 0.5±0.1  | > 0.2±0.1  | < 0.5±0.1 | =         | 0.9±0.3                                                                       | = 0.9±0.2 | > 0.5±0.2 | = 0.5±0.1 | > 0.4±0.1 | = 0.5±0.3  | =          | 1.2±0.8                                                                               | 0.5±0.2   | 0.6±0.1                                                                  | =       | 0.8±0.3    | =        | 1.2±0.4                                                                  | =        | 0.4±0.2  | =       |          |         |          |         |          |   |
| 14:0/16:0  | 7.9±1.4                                                                | > 0.7±0.4  | = 1.0±0.0  | = 0.7±0.4  | = 1.0±0.2  | < 7.5±2.1 | >         | 5.8±1.1                                                                       | > 1.2±0.2 | = 1.2±0.3 | > 0.7±0.3 | = 0.8±0.2 | < 4.6±2.5  | >          | 6.5±0.4                                                                               | 6.0±1.7   | 7.7±1.2                                                                  | =       | 7.4±0.6    | =        | 5.5±0.3                                                                  | =        | 5.4±0.3  | =       |          |         |          |         |          |   |
| 15:1/16:1  | -                                                                      | =          | -          | =          | -          | <         | +         | >                                                                             | -         | =         | -         | =         | -          | <          | 0.1±0.0                                                                               | +         | +                                                                        | =       | -          | =        | +                                                                        | =        | -        | =       |          |         |          |         |          |   |
| 16:1/15:0  | +                                                                      | =          | -          | <          | 0.1±0.0    | =         | +         | =                                                                             | 0.1±0.1   | >         | -         | <         | -          | <          | +                                                                                     | -         | +                                                                        | =       | -          | =        | +                                                                        | =        | 0.1±0.0  | =       |          |         |          |         |          |   |
| 15:0/16:0  | +                                                                      | >          | -          | =          | -          | =         | -         | =                                                                             | -         | <         | 0.2±0.0   | >         | -          | <          | 0.1±0.0                                                                               | 0.1±0.0   | +                                                                        | =       | 0.1±0.0    | =        | 0.1±0.0                                                                  | =        | 0.1±0.1  | =       |          |         |          |         |          |   |
| 14:0/18:4  | 0.4±0.1                                                                | = 0.4±0.2  | = 0.3±0.2  | = 0.1±0.0  | = 0.1±0.0  | = 0.1±0.0 | =         | 0.3±0.2                                                                       | < 0.8±0.3 | > 0.4±0.1 | = 0.3±0.1 | = 0.2±0.1 | = 0.1±0.1  | =          | 0.2±0.1                                                                               | 0.2±0.0   | 0.2±0.0                                                                  | =       | 0.1±0.0    | =        | 1.1±0.1                                                                  | >        | 0.1±0.0  | =       |          |         |          |         |          |   |
| 14:0/18:3  | 6.3±1.2                                                                | = 5.2±0.8  | = 4.9±0.5  | > 3.3±0.1  | = 3.3±0.4  | = 4.0±1.4 | =         | 5.2±1.5                                                                       | = 6.0±1.0 | > 4.7±0.3 | > 2.3±0.5 | = 2.4±0.4 | = 3.4±0.9  | =          | 3.5±0.3                                                                               | 2.2±0.3   | 6.4±1.0                                                                  | =       | 4.2±0.5    | =        | 3.9±0.7                                                                  | =        | 3.9±0.3  | =       |          |         |          |         |          |   |
| 14:0/18:2  | 3.7±1.2                                                                | > 1.4±0.7  | = 2.1±0.8  | < 4.4±1.6  | = 4.3±0.8  | < 6.0±1.2 | =         | 4.4±0.2                                                                       | > 2.3±0.8 | = 2.7±0.9 | = 2.8±0.8 | = 3.3±0.4 | < 6.7±1.3  | >          | 3.0±0.5                                                                               | 3.9±1.7   | 2.8±0.1                                                                  | =       | 4.7±2.0    | =        | 2.9±0.1                                                                  | <        | 7.0±3.0  | =       |          |         |          |         |          |   |
| 14:0/18:1  | 2.0±0.3                                                                | > 1.1±0.7  | = 1.8±0.8  | = 2.1±0.5  | = 1.4±0.6  | < 2.3±0.5 | =         | 2.1±0.5                                                                       | = 1.8±0.9 | = 1.6±0.7 | < 2.6±0.2 | > 1.9±0.5 | = 2.4±1.4  | =          | 2.0±0.8                                                                               | 2.1±0.8   | 2.5±0.0                                                                  | =       | 1.8±0.5    | =        | 2.7±0.1                                                                  | =        | 2.2±0.6  | =       |          |         |          |         |          |   |
| 16:1/16:0  | 0.9±0.0                                                                | = 0.8±0.0  | = 0.8±0.0  | = 0.5±0.3  | = 1.1±0.7  | = 0.6±0.0 | =         | 1.0±0.0                                                                       | = 0.6±0.0 | = 1.2±0.0 | > 0.4±0.1 | < 1.3±0.5 | = 1.3±0.0  | >          | 0.9±0.0                                                                               | 1.4±0.5   | -                                                                        | =       | -          | =        | -                                                                        | =        | -        | =       |          |         |          |         |          |   |
| 16:0/16:0  | 2.0±0.4                                                                | > 0.9±0.1  | > 0.5±0.0  | = 0.4±0.1  | < 0.7±0.2  | < 4.0±0.5 | >         | 1.9±1.7                                                                       | = 0.6±0.1 | < 0.9±0.2 | = 0.8±0.4 | = 1.4±0.4 | < 7.4±0.8  | >          | 3.4±0.3                                                                               | 6.0±0.8   | 1.7±0.2                                                                  | =       | 3.8±0.8    | =        | 3.6±0.5                                                                  | =        | 6.3±1.5  | =       |          |         |          |         |          |   |
| 15:0/18:3  | 0.2±0.1                                                                | >          | -          | <          | 0.1±0.1    | = 0.1±0.1 | = 0.2±0.1 | = 0.2±0.1                                                                     | =         | 0.2±0.1   | >         | -         | <          | 0.2±0.1    | = 0.1±0.1                                                                             | = 0.2±0.1 | 0.1±0.0                                                                  | =       | 0.5±0.3    | =        | 0.2±0.0                                                                  | =        | 0.3±0.3  | =       |          |         |          |         |          |   |
| 15:0/18:2  | -                                                                      | =          | -          | =          | -          | =         | -         | =                                                                             | -         | =         | -         | =         | -          | =          | -                                                                                     | =         | -                                                                        | =       | -          | =        | -                                                                        | =        | -        | =       |          |         |          |         |          |   |
| 15:0/18:1  | 0.3±0.2                                                                | = 0.4±0.2  | = 0.4±0.2  | = 0.5±0.3  | = 0.3±0.1  | = 0.5±0.3 | =         | 0.6±0.1                                                                       | = 0.6±0.2 | = 0.6±0.1 | = 0.6±0.1 | = 0.4±0.2 | = 0.5±0.3  | =          | 0.5±0.1                                                                               | 0.6±0.2   | 0.4±0.2                                                                  | =       | 0.7±0.0    | =        | 0.7±0.1                                                                  | =        | 0.5±0.3  | =       |          |         |          |         |          |   |
| 16:0/17:0  | +                                                                      | =          | -          | =          | -          | <         | 0.1±0.0   | >                                                                             | -         | <         | 0.1±0.1   | =         | -          | <          | +                                                                                     | = 0.1±0.1 | -                                                                        | =       | +          | =        | 0.1±0.1                                                                  | =        | 0.1±0.0  | =       |          |         |          |         |          |   |
| 20:5/14:0  | +                                                                      | <          | 0.1±0.0    | = 0.1±0.0  | = 0.1±0.1  | = 0.1±0.0 | >         | -                                                                             | <         | 0.1±0.0   | = 0.1±0.0 | = 0.1±0.1 | = 0.1±0.0  | >          | -                                                                                     | <         | +                                                                        | =       | 0.1±0.0    | =        | +                                                                        | =        | +        | =       |          |         |          |         |          |   |
| 14:0/20:5  | -                                                                      | <          | 0.1±0.0    | >          | -          | <         | +         | =                                                                             | +         | =         | 0.1±0.0   | >         | -          | =          | -                                                                                     | <         | 0.1±0.0                                                                  | 0.1±0.0 | -          | =        | -                                                                        | =        | 0.1±0.0  | =       |          |         |          |         |          |   |
| 16:1/18:3  | 0.1±0.1                                                                | = 0.5±0.4  | = 0.3±0.1  | = 0.2±0.1  | = 0.2±0.1  | = 0.2±0.1 | =         | 0.1±0.1                                                                       | < 0.6±0.2 | > 0.2±0.1 | >         | +         | <          | 0.2±0.1    | >                                                                                     | +         | =                                                                        | 0.1±0.0 | 0.2±0.2    | 0.2±0.1  | =                                                                        | 0.1±0.0  | =        | 0.1±0.0 | =        |         |          |         |          |   |
| 14:0/20:4  | -                                                                      | <          | 0.7±0.3    | >          | 0.1±0.0    | = 0.2±0.2 | =         | +                                                                             | =         | +         | =         | +         | =          | 0.2±0.2    | =                                                                                     | 0.3±0.3   | 0.3±0.0                                                                  | 0.1±0.0 | =          | -        | =                                                                        | 0.1±0.0  | =        | 0.2±0.1 | =        |         |          |         |          |   |
| 18:3/16:0+ | 5.9±1.3                                                                | <          | 8.3±0.5    | = 7.8±1.2  | = 6.6±1.0  | >         | 3.8±1.1   | = 6.1±1.8                                                                     | =         | 6.4±1.8   | <         | 10.6±1.4  | = 10.7±0.3 | >          | 7.4±1.0                                                                               | = 8.8±0.8 | = 10.2±1.2                                                               | >       | 6.3±0.9    | 11.5±1.8 | 5.7±0.3                                                                  | =        | 8.0±1.8  | =       | 6.6±0.6  | =       | 12.5±4.2 | =       |          |   |
| 16:0/18:3  | 3.4±0.3                                                                | <          | 9.5±0.5    | = 11.3±2.6 | = 13.7±2.4 | >         | 9.3±0.5   | >                                                                             | 7.2±1.6   | <         | 3.7±0.7   | <         | 6.2±0.5    | = 6.8±0.8  | <                                                                                     | 11.7±0.5  | >                                                                        | 9.7±0.3 | = 11.5±3.4 | =        | 4.1±0.4                                                                  | 12.6±3.5 | 3.0±0.5  | =       | 6.6±1.2  | =       | 3.9±0.6  | =       | 11.8±1.8 | = |
| 18:2/16:0  | 60.2±3.7                                                               | = 58.9±2.6 | = 59.9±1.5 | = 58.5±2.9 | <          | 67.5±1.4  | >         | 55.8±5.1                                                                      | =         | 60.3±2.1  | >         | 56.0±1.9  | = 57.9±1.7 | = 61.2±3.2 | = 61.1±1.0                                                                            | >         | 45.4±2.3                                                                 | <       | 58.1±1.3   | 45.2±2.3 | 63.0±3.6                                                                 | =        | 56.9±7.9 | =       | 56.9±0.9 | =       | 41.4±4.5 | =       |          |   |
| 18:1/16:0  | 2.5±0.3                                                                | = 3.4±2.6  | = 4.9±0.3  | = 5.0±0.8  | >          | 3.6±0.4   | >         | 1.6±0.4                                                                       | <         | 1.2±0.5   | <         | 2.3±0.8   | = 2.9±0.7  | = 3.2±0.3  | >                                                                                     | 2.7±0.2   | >                                                                        | 0.7±0.6 | <          | 1.8±0.5  | 1.0±0.5                                                                  | 1.5±0.1  | <        | 1.3±0.0 | =        | 1.5±0.3 | =        | 1.4±0.7 | =        |   |
| 18:0/16:0  | 0.1±0.0                                                                | = 0.2±0.0  | >          | 0.1±0.0    | = 0.1±0.0  | = 0.1±0.0 | <         | 0.4±0.1                                                                       | >         | 0.1±0.0   | = 0.1±0.0 | = 0.1±0.0 | = 0.1±0.0  | <          | 0.4±0.2                                                                               | >         | 0.3±0.2                                                                  | 0.3±0.1 | 0.1±0.0    | =        | 0.4±0.2                                                                  | =        | 0.2±0.1  | =       | 0.5±0.3  | =       |          |         |          |   |
| 18:4/18:4  | 0.4±0.3                                                                | = 1.4±1.6  | = 0.3±0.1  | = 0.4±0.2  | >          | 0.1±0.1   | = 0.2±0.1 | <                                                                             | 0.6±0.2   | = 0.4±0.2 | = 0.3±0.0 | = 0.4±0.5 | = 0.6±0.7  | = 0.5±0.3  | =                                                                                     | 2.5±1.3   | 0.4±0.2                                                                  | 0.2±0.1 | =          | 0.1±0.0  | =                                                                        | 0.6±0.0  | =        | 0.4±0.1 | =        |         |          |         |          |   |
| 18:3/18:4  | 0.4±0.2                                                                | = 0.9±0.5  | = 0.5±0.1  | >          | 0.1±0.1    | = 0.2±0.0 | = 0.2±0.1 | =                                                                             | 0.9±0.1   | = 1.4±0.5 | = 1.1±0.2 | >         | 0.5±0.2    | = 0.5±0.1  | = 0.5±0.2                                                                             | =         | 1.3±0.6                                                                  | 0.8±0.4 | 0.4±0.0    | =        | 0.4±0.5                                                                  | =        | 1.0±0.3  | =       | 0.6±0.3  | =       |          |         |          |   |
| 18:3/18:3  | 0.8±0.4                                                                | = 1.5±0.7  | = 1.0±0.4  | = 0.6±0.3  | = 0.4±0.2  | = 0.4±0.2 | =         | 1.1±0.4                                                                       | = 1.7±0.6 | = 1.8±0.2 | >         | 0.8±0.1   | = 0.8±0.1  | = 0.6±0.4  | =                                                                                     | 0.9±0.6   | 0.6±0.3                                                                  | 0.8±0.2 | =          | 0.4±0.0  | =                                                                        | 0.8±0.1  | =        | 0.8±0.1 | =        |         |          |         |          |   |
| 18:3/18:2  | 0.3±0.1                                                                | = 0.7±0.5  | = 0.2±0.1  | <          | 0.3±0.0    | = 0.2±0.1 | = 0.2±0.2 | =                                                                             | 0.2±0.1   | <         | 0.5±0.2   | = 0.4±0.1 | = 0.4±0.1  | = 0.3±0.1  | = 0.3±0.2                                                                             | =         | 0.2±0.1                                                                  | 0.2±0.1 | 0.2±0.0    | =        | 0.2±0.0                                                                  | =        | 0.2±0.0  | =       | 0.7±0.3  | =       |          |         |          |   |
| 20:5/16:0  | 0.1±0.1                                                                | <          | 0.5±0.3    | >          | 0.1±0.0    | = 0.1±0.0 | = 0.2±0.1 | = 0.1±0.1                                                                     | =         | 0.2±0.1   | = 0.3±0.1 | = 0.2±0.1 | = 0.4±0.3  | = 0.1±0.1  | = 0.2±0.2                                                                             | =         | 0.2±0.0                                                                  | 0.2±0.2 | 0.1±0.0    | =        | 0.4±0.4                                                                  | =        | 0.2±0.1  | =       | 0.2±0.0  | =       |          |         |          |   |
| 18:2/18:2  | 0.2±0.0                                                                | >          | +          | >          | -          | <         | 0.1±0.0   | = 0.1±0.1                                                                     | = 0.2±0.1 | >         | 0.1±0.0   | = 0.1±0.0 | = 0.1±0.0  | = 0.1±0.1  | = 0.2±0.2                                                                             | =         | 0.1±0.1                                                                  | 0.2±0.1 | +          | <        | 0.2±0.0                                                                  | =        | 0.1±0.0  | =       | 0.2±0.0  | =       |          |         |          |   |
| 20:4/16:0  | -                                                                      | <          | 0.2±0.0    | >          | 0.1±0.0    | <         | 0.2±0.1   | >                                                                             | 0.1±0.0   | =         | +         | =         | +          | =          | 0.1±0.1                                                                               | <         | 0.3±0.0                                                                  | >       | +          | =        | 0.1±0.1                                                                  | =        | -        | =       | 0.1±0.0  | =       |          |         |          |   |
| 16:0/20:4  | 0.2±0.0                                                                | = 0.3±0.0  | = 0.1±0.1  | >          | -          | <         | 0.1±0.0   | = 0.1±0.1                                                                     | >         | 0.1±0.0   | = 0.1±0.0 | <         | 0.2±0.1    | = 0.2±0.0  | = 0.2±0.0                                                                             | =         | +                                                                        | 0.2±0.2 | +          | =        | 0.1±0.0                                                                  | =        | -        | =       | 0.1±0.2  | =       |          |         |          |   |

|            |                                                                  |                                                                  |                  |                       |                       |
|------------|------------------------------------------------------------------|------------------------------------------------------------------|------------------|-----------------------|-----------------------|
| 18:2/18:1  | + = - = 0.1±0.1 = 0.1±0.0 < 0.6±0.4 = 0.1±0.1 =                  | + > - < 0.1±0.1 = + < 0.3±0.2 > + =                              | + 0.3±0.1        | - = 0.3±0.0 =         | 0.1±0.1 = 0.1±0.0 =   |
| 20:3/16:0  | 0.3±0.0 = 0.3±0.3 = 0.1±0.0 = 0.1±0.2 = 0.4±0.3 = 0.3±0.1 =      | 0.4±0.3 = 0.4±0.2 = 0.5±0.1 = 0.5±0.2 = 0.8±0.8 = 0.4±0.1 =      | 0.3±0.2 0.4±0.1  | 0.2±0.2 = 0.3±0.0 =   | 0.2±0.1 = 0.3±0.1 =   |
| 18:0/18:3  | + < 0.6±0.4 = 0.1±0.0 = 0.1±0.0 = + = + =                        | - < 0.1±0.0 > - = 0.2±0.2 = 0.1±0.2 = - =                        | 0.1±0.1 -        | + = - =               | 0.1±0.0 = - =         |
| 16:0/20:0  | 0.1±0.1 = 0.1±0.0 = + = 0.1±0.0 = 0.1±0.0 < 0.2±0.1 >            | 0.2±0.0 > + = + = + = + < 0.6±0.1 >                              | 0.4±0.1 0.4±0.2  | 0.1±0.0 = 0.5±0.1 =   | 0.2±0.1 = 0.5±0.3 =   |
| 20:5/18:4  | 0.3±0.2 < 1.8±1.2 = 0.9±0.1 = 0.7±0.4 = 0.5±0.2 = 0.3±0.2 =      | 1.1±0.2 < 2.1±0.5 = 1.8±0.3 > 1.2±0.3 > 0.7±0.3 > 0.3±0.1 <      | 1.3±0.3 0.6±0.3  | 0.6±0.1 = 0.2±0.0 =   | 0.7±0.1 = 0.9±0.1 =   |
| 20:5/18:3  | 0.2±0.2 = 0.3±0.2 = 0.1±0.1 = 0.2±0.1 = 0.1±0.0 < 0.2±0.1 =      | 0.1±0.1 = 0.4±0.2 = 0.4±0.0 = 0.2±0.2 = 0.1±0.1 = 0.1±0.1 =      | 0.1±0.1 0.2±0.0  | 0.1±0.0 = 0.1±0.0 =   | 0.1±0.0 = 0.1±0.0 =   |
| 20:4/18:4  | 0.2±0.2 = 0.3±0.2 = 0.1±0.1 = 0.1±0.0 = 0.1±0.1 = 0.2±0.1 =      | 0.1±0.1 = 0.4±0.2 = 0.4±0.1 > 0.1±0.1 = 0.2±0.0 = 0.1±0.1 =      | 0.1±0.1 0.2±0.0  | 0.1±0.0 = 0.1±0.0 =   | 0.1±0.0 = 0.1±0.0 =   |
| 20:4/18:3  | - = - = - < 0.1±0.0 > - = - <                                    | - = - = - < + > - < 0.1±0.0 =                                    | 0.3±0.0 +        | - = - =               | 0.1±0.0 = - =         |
| 20:3/18:4  | - < 0.2±0.2 = + > - < + > - =                                    | + = + = + = + = 0.1±0.0 = 0.1±0.0 =                              | + 0.1±0.0        | + = - =               | + = 0.1±0.0 =         |
| 20:4/18:3  | 0.1±0.1 = - = - < 0.1±0.1 = 0.1±0.0 > + <                        | 0.1±0.0 = - = 0.1±0.1 > - < 0.1±0.0 = + >                        | + -              | - = + =               | + = + =               |
| 20:5/20:5  | - = - = - < + > - = - <                                          | - = - = - < + > - = - <                                          | - -              | - = - =               | - = - =               |
| 20:4/20:4  | - = - = - < + > - = - <                                          | - = - = - < + > - = - <                                          | + -              | + = - =               | - = - =               |
| SFA/SFA    | 10.8±1.1 > 1.7±0.3 = 1.7±0.0 = 1.5±0.5 = 2.0±0.1 < 12.7±1.7 >    | 9.1±1.7 > 2.8±0.3 = 2.5±0.3 = 2.0±0.4 = 2.4±0.2 < 14.2±4.0 >     | 11.9±0.614.0±2.0 | 10.3±0.8 = 13.0±1.3 = | 13.5±0.4 > 13.7±1.1 = |
| SFA/MUFA   | 2.9±0.2 > 1.7±0.6 = 2.6±0.8 = 3.1±0.9 = 1.9±0.4 < 3.2±0.9 =      | 3.6±0.7 = 3.4±0.8 = 2.7±0.6 < 3.8±0.1 > 2.7±0.6 = 3.4±0.8 =      | 3.7±0.2 3.2±1.0  | 3.5±0.3 = 3.0±0.7 =   | 4.6±0.2 = 3.2±0.7 =   |
| MUFA/SFA   | - = - = - = - = - = - =                                          | - = - = - = - = - = - =                                          | - -              | - = - =               | - = - =               |
| SFA/PUFA   | 13.7±2.2 = 12.3±0.6 > 11.6±0.1 = 11.6±1.5 = 9.9±1.2 < 13.7±1.2 = | 13.5±2.3 = 15.4±1.3 = 14.0±1.3 > 9.6±1.5 = 11.0±0.7 < 15.8±1.6 > | 10.4±0.613.0±1.2 | 12.7±1.3 = 13.3±3.8 = | 12.0±0.2 = 18.0±1.2 = |
| PUFA/SFA   | 6.8±0.5 < 14.4±0.7 = 15.4±2.1 = 17.4±2.0 > 11.8±0.6 = 10.7±2.6 < | 7.5±0.4 < 12.4±0.7 = 13.0±1.0 < 16.3±0.6 = 15.1±1.2 = 17.4±4.1 = | 7.6±0.7 19.1±4.4 | 6.2±0.8 = 11.3±1.7 =  | 7.6±0.6 = 18.5±4.2 =  |
| MUFA/MUFA  | + = + = + = + = + = + = + =                                      | + = + = + = + = + = + = + =                                      | + +              | + = + =               | + = + =               |
| MUFA/PUFA  | 0.1±0.1 = 0.5±0.4 = 0.3±0.1 = 0.1±0.1 = 0.1±0.1 = 0.2±0.1 =      | 0.1±0.1 < 0.6±0.2 > 0.2±0.1 > + < 0.2±0.1 > + =                  | + 0.1±0.1        | 0.2±0.1 = 0.1±0.1 =   | 0.1±0.1 = 0.1±0.1 =   |
| PUFA/ MUFA | + = 0.1±0.1 = 0.1±0.1 = + = 0.4±0.4 = 0.1±0.1 =                  | + = + < 0.1±0.1 > + < 0.3±0.2 > + =                              | + 0.2±0.2        | + = 0.1±0.2 =         | 0.1±0.1 = + =         |
| PUFA/PUFA  | 2.6±0.3 < 6.7±1.9 > 3.3±0.3 > 2.5±0.6 > 1.7±0.3 = 1.8±0.6 =      | 4.3±0.6 < 7.1±1.8 = 6.3±0.5 > 3.6±0.5 = 3.2±1.0 = 2.7±0.8 =      | 6.0±1.5 3.4±1.2  | 2.5±0.3 = 1.0±0.4 =   | 3.8±0.2 = 3.8±0.3 =   |

| PG        | The lower part of the blades of infected <i>U. pinmatifida</i> samples |      |         |      |         |      |         | The upper intact part of the blades of infected <i>U. pinmatifida</i> samples |         |      |         |      |         |   | The upper part of the blades of infected <i>U. pinmatifida</i> samples with endophyte |         | The lower part of the blades of uninfected <i>U. pinmatifida</i> samples |         |         |   | The upper part of the blades of uninfected <i>U. pinmatifida</i> samples |   |         |   |
|-----------|------------------------------------------------------------------------|------|---------|------|---------|------|---------|-------------------------------------------------------------------------------|---------|------|---------|------|---------|---|---------------------------------------------------------------------------------------|---------|--------------------------------------------------------------------------|---------|---------|---|--------------------------------------------------------------------------|---|---------|---|
|           | Nov.                                                                   | Dec. | Jan.    | Feb. | Apr.    | Jun. | T       | Nov.                                                                          | Dec.    | Jan. | Feb.    | Apr. | Jun.    | T | Nov.                                                                                  | Jun.    | Nov.                                                                     | S       | Jun.    | S | Nov.                                                                     | S | Jun.    | S |
| 14:0/16:3 | +                                                                      | =    | +       | >    | +       | >    | -       | <                                                                             | +       | >    | -       | =    | -       | < | +                                                                                     | +       | -                                                                        | =       | 0.1±0.0 | = | +                                                                        | = | -       | = |
| 14:0/16:2 | -                                                                      | <    | +       | >    | -       | <    | +       | =                                                                             | +       | >    | -       | <    | +       | > | +                                                                                     | +       | -                                                                        | =       | -       | = | 0.1±0.0                                                                  | > | +       | = |
| 14:0/16:2 | +                                                                      | >    | -       | <    | +       | =    | +       | >                                                                             | -       | <    | +       | =    | -       | < | +                                                                                     | +       | +                                                                        | =       | -       | = | +                                                                        | = | -       | = |
| 14:0/16:1 | 0.1±0.0                                                                | >    | +       | =    | +       | =    | +       | =                                                                             | +       | =    | +       | =    | +       | = | 0.1±0.0                                                                               | 0.2±0.1 | +                                                                        | =       | -       | = | 0.4±0.1                                                                  | = | +       | = |
| 14:0/16:1 | -                                                                      | =    | -       | =    | +       | =    | +       | =                                                                             | +       | <    | +       | =    | +       | < | 0.1±0.0                                                                               | -       | +                                                                        | =       | -       | = | +                                                                        | = | +       | = |
| 15:0/15:0 | -                                                                      | =    | -       | =    | -       | <    | +       | =                                                                             | +       | >    | -       | <    | -       | = | +                                                                                     | 0.1±0.0 | -                                                                        | =       | -       | = | +                                                                        | = | -       | = |
| 14:0/16:0 | 0.1±0.0                                                                | =    | +       | =    | +       | =    | +       | =                                                                             | +       | =    | 0.1±0.1 | =    | +       | < | 0.1±0.1                                                                               | >       | 0.1±0.1                                                                  | 0.2±0.1 | 0.1±0.0 | = | +                                                                        | = | 0.1±0.0 | = |
| 14:0/16:0 | +                                                                      | =    | +       | >    | -       | <    | +       | =                                                                             | +       | =    | +       | =    | +       | > | +                                                                                     | +       | +                                                                        | =       | 0.1±0.0 | = | +                                                                        | = | -       | = |
| 16:1/15:0 | +                                                                      | =    | +       | =    | +       | =    | +       | =                                                                             | +       | =    | +       | =    | +       | = | +                                                                                     | +       | +                                                                        | =       | -       | = | +                                                                        | = | +       | = |
| 16:1/16:4 | -                                                                      | =    | -       | <    | +       | >    | -       | <                                                                             | +       | >    | -       | =    | -       | < | +                                                                                     | +       | +                                                                        | =       | -       | = | +                                                                        | = | -       | = |
| 14:1/18:3 | 0.1±0.0                                                                | =    | 0.1±0.0 | =    | 0.1±0.0 | =    | 0.1±0.1 | =                                                                             | 0.1±0.0 | >    | +       | <    | 0.1±0.1 | = | 0.1±0.0                                                                               | 0.1±0.0 | 0.1±0.0                                                                  | =       | -       | = | 0.2±0.0                                                                  | = | +       | = |
| 16:1/16:2 | -                                                                      | <    | +       | =    | +       | =    | +       | =                                                                             | +       | =    | +       | =    | +       | < | 0.1±0.0                                                                               | >       | +                                                                        | 0.1±0.0 | +       | = | +                                                                        | = | +       | = |
| 18:3/14:0 | 0.2±0.0                                                                | >    | 0.1±0.0 | =    | 0.1±0.0 | =    | +       | =                                                                             | 0.1±0.0 | <    | 0.2±0.1 | >    | 0.2±0.1 | > | 0.1±0.0                                                                               | =       | 0.1±0.0                                                                  | 0.2±0.0 | 0.2±0.0 | = | 0.2±0.1                                                                  | = | 0.2±0.1 | = |
| 14:0/18:3 | +                                                                      | =    | +       | <    | 0.1±0.0 | =    | +       | <                                                                             | 0.1±0.0 | =    | 0.1±0.0 | =    | +       | = | +                                                                                     | +       | +                                                                        | =       | +       | = | +                                                                        | = | 0.1±0.0 | = |

|            |          |   |          |   |          |   |          |   |          |   |          |   |          |   |          |   |          |   |          |   |          |   |           |         |          |          |          |   |          |   |          |   |          |   |
|------------|----------|---|----------|---|----------|---|----------|---|----------|---|----------|---|----------|---|----------|---|----------|---|----------|---|----------|---|-----------|---------|----------|----------|----------|---|----------|---|----------|---|----------|---|
| 16:1/16:1  | +        | = | +        | = | +        | = | +        | > | +        | < | +        | = | +        | < | 0.1±0.0  | > | +        | < | 0.1±0.0  | = | 0.1±0.0  | = | +         | =       | +        | 0.1±0.0  | +        | = | -        | = | 0.1±0.0  | > | 0.1±0.0  | = |
| 14:0/18:2  | 0.2±0.1  | > | 0.1±0.0  | < | 0.2±0.1  | < | 0.3±0.0  | < | 0.4±0.0  | > | 0.2±0.1  | < | 0.2±0.1  | = | 0.2±0.0  | = | 0.2±0.1  | = | 0.3±0.1  | = | 0.4±0.2  | = | 0.2±0.1   | 0.5±0.1 | 0.3±0.0  | =        | 0.2±0.1  | = | 0.4±0.1  | = | 0.2±0.1  | = |          |   |
| 16:0/16:2  | +        | = | +        | = | +        | = | +        | > | -        | < | +        | < | -        | < | +        | = | +        | > | +        | < | +        | < | 0.1±0.0   | >       | +        | +        | +        | = | -        | = | +        | = | +        | = |
| 14:0/18:1+ |          |   |          |   |          |   |          |   |          |   |          |   |          |   |          |   |          |   |          |   |          |   |           |         |          |          |          |   |          |   |          |   |          |   |
| 16:1/16:0+ | 0.6±0.1  | > | 0.3±0.1  | < | 0.5±0.1  | = | 0.6±0.3  | > | 0.1±0.1  | < | 0.5±0.1  | = | 0.8±0.3  | = | 0.6±0.1  | = | 0.5±0.1  | > | 0.2±0.2  | < | 0.9±0.2  | > | 0.6±0.0   | >       | 0.9±0.2  | 0.9±0.1  | 0.8±0.1  | = | 0.5±0.1  | = | 2.0±0.5  | = | 0.6±0.1  | = |
| 16:0/16:1  |          |   |          |   |          |   |          |   |          |   |          |   |          |   |          |   |          |   |          |   |          |   |           |         |          |          |          |   |          |   |          |   |          |   |
| 16:0/16:0  | +        | = | +        | = | +        | = | +        | = | +        | < | 0.1±0.0  | > | +        | > | +        | = | +        | = | +        | = | +        | < | 0.1±0.0   | >       | +        | 0.1±0.0  | +        | = | +        | = | +        | = | +        | = |
| 15:0/18:4  | 0.1±0.0  | = | 0.1±0.0  | = | 0.1±0.0  | = | 0.1±0.0  | = | 0.1±0.0  | > | +        | = | 0.2±0.0  | = | 0.2±0.0  | = | 0.2±0.0  | > | 0.1±0.0  | = | 0.1±0.0  | = | 0.1±0.2   | =       | 0.1±0.1  | 0.1±0.1  | 0.1±0.0  | = | -        | = | 0.1±0.0  | = | 0.1±0.1  | = |
| 15:0/18:3  | 0.1±0.0  | = | 0.1±0.0  | = | 0.1±0.0  | > | +        | = | +        | < | 0.1±0.1  | > | 0.1±0.0  | = | 0.1±0.0  | = | 0.1±0.0  | > | +        | = | +        | < | 0.2±0.1   | >       | 0.1±0.0  | 0.2±0.1  | 0.1±0.0  | = | 0.2±0.0  | = | 0.1±0.0  | = | 0.4±0.1  | = |
| 17:3/16:0  | +        | > | -        | = | -        | = | -        | = | -        | < | +        | > | +        | > | -        | = | +        | > | -        | = | -        | < | +         | >       | +        | +        | -        | = | -        | = | -        | = | -        | = |
| 15:0/18:2  | +        | = | +        | = | +        | = | +        | = | +        | = | 0.1±0.1  | = | 0.1±0.0  | = | +        | = | 0.1±0.0  | = | +        | = | 0.1±0.0  | = | 0.1±0.2   | =       | 0.1±0.0  | 0.1±0.1  | +        | = | 0.1±0.0  | = | 0.1±0.0  | = | 0.1±0.1  | = |
| 17:2/16:0  | -        | = | -        | < | +        | > | -        | < | +        | = | +        | > | -        | = | -        | = | +        | > | -        | < | +        | > | -         | =       | -        | +        | -        | = | +        | = | -        | = | -        | = |
| 15:0/18:1  | +        | = | -        | = | -        | < | +        | = | +        | > | -        | < | +        | > | -        | = | -        | < | +        | < | +        | < | 0.2±0.0   | >       | +        | 0.1±0.0  | +        | = | +        | = | 0.1±0.0  | = | 0.1±0.0  | = |
| 15:0/18:1  | 0.1±0.1  | > | +        | = | +        | = | +        | = | +        | = | 0.1±0.0  | = | 0.1±0.0  | = | 0.1±0.0  | = | +        | = | +        | = | +        | < | 0.1±0.1   | =       | 0.1±0.1  | 0.2±0.2  | 0.1±0.1  | = | -        | = | 0.1±0.0  | = | 0.1±0.0  | = |
| 17:1/16:0  | -        | = | -        | < | +        | = | +        | = | +        | < | 0.1±0.0  | > | +        | > | -        | < | +        | = | +        | = | +        | = | +         | =       | +        | 0.1±0.0  | -        | = | +        | = | +        | = | -        | = |
| 15:0/18:0  | +        | = | +        | > | +        | < | +        | = | +        | = | +        | = | +        | = | +        | = | +        | = | +        | = | +        | = | +         | >       | -        | +        | +        | = | +        | = | +        | = | +        | = |
| 18:3/16:2  | +        | = | +        | = | +        | > | -        | < | +        | = | +        | > | 0.1±0.1  | = | +        | = | +        | > | +        | = | +        | < | +         | >       | +        | +        | +        | = | -        | = | -        | = | +        | = |
| 14:0/20:5  | 0.1±0.0  | = | 0.1±0.1  | = | 0.1±0.0  | = | 0.1±0.0  | > | 0.1±0.0  | = | +        | < | 0.2±0.1  | = | 0.3±0.0  | = | 0.3±0.1  | > | 0.1±0.0  | = | 0.1±0.0  | > | 0.1±0.0   | <       | 0.2±0.1  | 0.2±0.2  | 0.1±0.0  | = | +        | = | 0.3±0.0  | = | 0.1±0.0  | = |
| 18:3/16:1  | 0.4±0.0  | = | 0.4±0.1  | = | 0.4±0.1  | = | 0.3±0.1  | = | 0.3±0.0  | = | 0.5±0.4  | = | 0.3±0.0  | = | 0.3±0.1  | = | 0.3±0.1  | > | 0.2±0.0  | = | 0.2±0.1  | = | 0.3±0.2   | =       | 0.3±0.1  | 0.2±0.1  | 0.4±0.0  | = | 0.4±0.1  | = | 0.3±0.0  | < | 0.3±0.0  | = |
| 18:3/16:1  | 23.8±3.2 | < | 28.8±2.7 | = | 29.1±3.9 | = | 33.0±5.1 | > | 23.9±1.1 | > | 14.6±6.8 | < | 38.3±1.1 | > | 33.9±1.6 | = | 35.8±3.6 | < | 46.6±1.1 | > | 40.1±3.5 | = | 28.6±10.9 | <       | 34.0±3.2 | 26.6±7.5 | 24.0±0.8 | = | 9.6±5.5  | = | 37.3±2.6 | = | 30.6±1.5 | = |
| 18:3/16:0  | 11.4±1.5 | > | 9.0±0.5  | < | 12.0±1.6 | > | 7.8±2.3  | = | 9.7±0.9  | < | 26.3±4.1 | > | 7.2±0.1  | > | 5.9±0.6  | < | 7.1±0.9  | > | 3.4±0.7  | < | 5.6±0.4  | < | 15.2±6.7  | >       | 6.9±0.4  | 12.8±5.5 | 12.1±0.6 | = | 31.8±3.9 | = | 6.9±0.3  | = | 18.6±3.6 | = |
| 16:0/18:3  | 0.3±0.1  | = | 0.5±0.1  | = | 0.5±0.2  | = | 0.8±0.4  | = | 0.8±0.1  | > | 0.4±0.1  | = | -        | < | 0.1±0.0  | = | 0.2±0.0  | = | 0.2±0.1  | = | 0.2±0.0  | = | 0.2±0.0   | =       | 0.3±0.0  | 0.1±0.0  | 0.4±0.3  | = | 0.3±0.3  | = | 0.1±0.1  | = | 0.2±0.0  | = |
| 18:2/16:1  | 0.3±0.1  | > | 0.1±0.0  | = | 0.2±0.2  | < | 0.5±0.2  | > | 0.3±0.0  | < | 0.9±0.4  | = | 0.4±0.1  | = | 0.3±0.1  | = | 0.4±0.1  | < | 1.1±0.4  | > | 0.6±0.2  | = | 0.9±0.6   | =       | 0.4±0.1  | 0.9±0.4  | 0.1±0.0  | = | 0.7±0.6  | = | 0.5±0.0  | = | 0.7±0.1  | = |
| 18:1/16:1  | 0.2±0.0  | > | 0.1±0.0  | > | +        | = | 0.1±0.1  | = | 0.1±0.0  | = | 0.1±0.1  | = | 0.2±0.1  | = | 0.2±0.1  | = | 0.1±0.0  | < | 0.4±0.3  | = | 0.5±0.1  | > | 0.3±0.0   | =       | 0.3±0.2  | 0.8±0.6  | 0.2±0.0  | = | 0.1±0.0  | = | 0.7±0.2  | = | 0.2±0.1  | = |
| 16:0/18:2  | 10.5±1.0 | < | 12.4±0.8 | < | 16.0±2.0 | < | 23.5±1.1 | = | 24.1±1.2 | > | 13.9±1.8 | < | 9.0±0.5  | < | 13.4±1.4 | = | 14.2±1.1 | < | 18.1±1.2 | = | 18.4±1.0 | > | 13.3±0.8  | <       | 9.3±0.1  | 10.3±0.4 | 11.1±0.5 | = | 15.1±2.6 | = | 10.3±1.0 | = | 10.8±1.0 | = |
| 16:0/18:2  | 0.1±0.0  | = | 0.1±0.0  | = | 0.1±0.0  | < | 0.2±0.0  | > | 0.1±0.0  | = | 0.2±0.0  | < | 0.1±0.0  | < | 0.1±0.0  | = | 0.1±0.0  | = | 0.1±0.0  | = | 0.1±0.0  | = | 0.1±0.0   | =       | 0.1±0.0  | 0.1±0.0  | 0.1±0.0  | = | 0.3±0.0  | > | 0.1±0.1  | = | +        | = |
| 18:1/16:1  | +        | > | +        | = | +        | = | +        | = | +        | > | +        | < | +        | = | +        | = | +        | = | +        | = | +        | = | +         | =       | +        | +        | +        | = | +        | = | +        | = | 0.1±0.0  | = |
| 16:0/18:1  | 13.7±2.5 | > | 6.6±0.7  | > | 5.3±0.5  | = | 6.8±1.5  | < | 9.4±0.4  | < | 15.1±4.5 | > | 14.4±0.9 | > | 8.9±0.5  | = | 7.9±1.1  | = | 8.3±0.2  | < | 9.2±0.5  | = | 10.5±2.3  | =       | 15.4±1.5 | 9.8±1.7  | 13.8±0.3 | = | 12.8±0.4 | = | 14.7±0.5 | = | 9.2±0.2  | = |
| 16:0/18:1  | +        | = | +        | = | +        | = | +        | = | +        | = | +        | = | +        | = | +        | = | +        | = | +        | = | +        | = | 0.1±0.1   | =       | +        | +        | +        | = | +        | = | +        | = | 0.1±0.0  | = |
| 16:0/18:0  | +        | > | -        | = | -        | = | -        | < | +        | < | +        | > | +        | > | -        | < | +        | > | -        | < | +        | < | +         | >       | -        | +        | -        | = | -        | = | -        | = | +        | = |
| 17:1/18:3  | +        | > | -        | = | -        | = | -        | = | -        | < | +        | > | +        | > | -        | = | -        | = | -        | = | -        | = | -         | =       | -        | +        | +        | = | -        | = | +        | = | +        | = |
| 18:2/17:1  | +        | = | +        | = | +        | > | -        | = | -        | = | -        | = | -        | < | +        | > | +        | = | +        | = | +        | > | -         | <       | -        | -        | +        | = | +        | = | +        | = | 0.1±0.0  | = |
| 17:0/18:3  | 0.1±0.0  | = | 0.1±0.0  | = | +        | = | 0.1±0.0  | = | 0.1±0.0  | = | 0.1±0.0  | = | 0.1±0.0  | > | 0.1±0.0  | = | 0.1±0.0  | > | +        | = | +        | < | 0.1±0.1   | >       | 0.1±0.0  | 0.1±0.0  | 0.1±0.0  | = | +        | = | 0.1±0.0  | = | 0.2±0.0  | = |
| 19:2/16:0  | +        | > | +        | = | +        | = | +        | = | +        | = | +        | = | +        | = | +        | = | +        | = | +        | = | +        | = | +         | =       | 0.1±0.1  | +        | +        | = | +        | = | +        | = | -        | = |
| 17:0/18:2  | 0.1±0.1  | = | 0.1±0.1  | = | 0.1±0.0  | = | 0.2±0.0  | = | 0.2±0.1  | = | 0.2±0.1  | = | 0.2±0.0  | = | 0.2±0.0  | = | 0.2±0.1  | > | 0.1±0.0  | = | 0.2±0.0  | < | 0.3±0.1   | >       | 0.2±0.0  | 0.1±0.1  | 0.2±0.1  | = | 0.2±0.0  | = | 0.3±0.0  | > | 0.4±0.2  | = |
| 18:1/17:0  | -        | = | -        | = | -        | = | -        | = | -        | = | -        | = | +        | > | -        | = | -        | = | -        | = | -        | < | +         | >       | +        | -        | +        | = | -        | = | -        | = | -        | = |
| 17:0/18:1  | 0.2±0.0  | > | 0.1±0.0  | = | +        | = | +        | = | 0.1±0.0  | = | 0.2±0.0  | > | 0.2±0.0  | > | 0.1±0.0  | = | 0.1±0.0  | > | +        | < | 0.1±0.0  | < | 0.2±0.1   | >       | 0.3±0.0  | 0.2±0.1  | 0.2±0.0  | = | 0.1±0.0  | = | 0.2±0.0  | = | 0.2±0.0  | = |
| 17:0/18:0  | +        | = | +        | = | +        | = | +        | = | +        | = | +        | = | +        | > | +        | = | +        | = | +        | = | +        | = | +         | =       | +        | +        | +        | = | -        | = | +        | < | -        | = |
| 18:5/18:5  | +        | = | +        | = | +        | > | -        | < | +        | = | +        | > | +        | = | +        | = | +        | > | -        | < | +        | > | -         | =       | 0.1±0.1  | +        | +        | = | -        | = | +        | = | +        | = |
| 16:4/20:5  | +        | = | +        | = | +        | = | +        | = | +        | = | 0.1±0.0  | = | +        | = | +        | > | -        | < | +        | = | +        | > | -         | <       | +        | -        | +        | = | +        | = | -        | = | +        | = |
| 18:4/18:4  | +        | < | 0.3±0.1  | = | 0.2±0.0  | = | 0.1±0.1  | = | 0.1±0.0  | > | -        | < | 0.2±0.1  | = | 0.1±0.0  | = | 0.1±0.0  | > | +        | = | 0.1±0.0  | < | 0.2±0.0   | >       | 1.2±0.3  | 0.8±0.3  | +        | = | +        | = | 0.5±0.0  | > | 0.1±0.0  | = |
| 18:3/18:4  | 0.9±0.4  | < | 1.7±0.2  | = | 1.9±0.5  | > | 0.5±0.3  | < | 0.9±0.2  | > | 0.3±0.2  | = | 0.9±0.0  | = | 1.0±0.2  | = | 0.7±0.2  | > | 0.2±0.1  | < | 0.7±0.2  | < | 1.3±0.2   | >       | 4.9±0.6  | 8.5±0.8  | 0.9±0.3  | = | 0.5±0.2  | = | 1.5±0.3  | = | 1.5±1.3  | = |
| 18:4/18:3  | 0.7±0.2  | < | 3.9±0.5  | > | 2.6±0.1  | > | 1.9±0.5  | = | 1.7±0.2  | > | +        | < | 0.9±0.2  | < | 2.4±0.3  | = | 2.5±0.1  | > | 0.9±0.1  | = | 1.2±0.4  | > | 0.2±0.0   | <       | 1.1±0.1  | 0.6±0.4  | 0.8±0.0  | = | 0.1±0.1  | = | 0.8±0.1  | = | 0.2±0.1  | = |

|            |                                                                   |                                                                 |                  |            |            |           |            |
|------------|-------------------------------------------------------------------|-----------------------------------------------------------------|------------------|------------|------------|-----------|------------|
| 18:3/18:3  | 20.2±4.5 = 23.8±2.2 > 19.2±0.6 > 10.1±4.2 = 14.8±0.8 = 11.2±5.0 = | 10.2±0.5 < 15.8±1.9 > 12.5±0.9 > 3.5±0.2 < 6.9±1.5 = 10.2±6.2 = | 9.7±0.7 11.9±3.7 | 19.8±2.9 = | 12.8±1.0 = | 7.2±0.5 < | 10.6±0.7 = |
| 18:3/18:3  | 0.1±0.0 = 0.1±0.0 = 0.1±0.0 = 0.1±0.1 = 0.1±0.0 = 0.1±0.1 =       | 0.1±0.0 = 0.1±0.0 = 0.1±0.0 = 0.1±0.0 = 0.2±0.0 = 0.2±0.1 =     | 0.1±0.0 0.1±0.1  | +          | =          | 0.1±0.0 = | 0.1±0.0 =  |
| 18:3/18:2  | 2.0±0.3 > 1.1±0.2 = 1.1±0.3 = 1.2±0.4 = 1.4±0.3 < 3.7±1.3 >       | 1.6±0.3 = 1.3±0.2 = 1.4±0.1 = 1.5±0.4 = 1.5±0.5 = 4.4±3.2 =     | 1.8±0.1 3.2±0.8  | 1.5±0.0 =  | 4.0±0.5 =  | 1.4±0.1 = | 4.3±1.4 =  |
| 18:2/18:3  | 0.1±0.0 = + = + = + = + = 0.1±0.0 =                               | + = 0.1±0.0 > + = + = + = + =                                   | 0.1±0.0 0.1±0.1  | +          | =          | -         | 0.1±0.0 =  |
| 18:1/18:4  | + = + > - < + = + = + =                                           | + = + = + = + = + = 0.1±0.0 =                                   | +                | +          | +          | =         | +          |
| 20:5/16:0  | + < + > - = + = + = + =                                           | 0.1±0.0 = + = + = + = + = 0.1±0.0 =                             | 0.1±0.1 0.1±0.1  | +          | =          | -         | 0.3±0.0 =  |
| 16:0/20:5  | 0.1±0.0 = 0.1±0.1 = 0.1±0.0 = 0.2±0.1 = 0.2±0.0 > 0.1±0.0 <       | 0.1±0.0 < 0.2±0.0 = 0.2±0.0 = 0.3±0.1 = 0.4±0.1 > 0.2±0.1 =     | 0.3±0.1 0.5±0.1  | 0.1±0.0 =  | 0.1±0.0 =  | 0.6±0.1 = | 0.2±0.0 =  |
| 18:2/18:2  | 0.7±0.1 > 0.4±0.1 = 0.4±0.1 < 0.7±0.2 = 0.6±0.1 < 2.1±0.3 >       | 0.4±0.1 > 0.3±0.1 < 0.4±0.0 < 0.8±0.2 > 0.6±0.1 = 1.4±1.0 =     | 0.5±0.2 1.1±0.1  | 0.4±0.1 <  | 2.2±0.4 =  | 0.3±0.0 = | 1.2±0.3 =  |
| 18:1/18:3+ | 0.2±0.1 = 0.3±0.1 > 0.2±0.1 = 0.1±0.1 = 0.1±0.0 < 0.3±0.1 >       | 0.3±0.0 = 0.3±0.1 = 0.2±0.0 > 0.2±0.0 = 0.1±0.0 < 0.2±0.1 =     | 0.2±0.1 0.2±0.1  | 0.3±0.0 =  | 0.3±0.1 =  | 0.3±0.0 = | 0.6±0.6 =  |
| 18:3/18:1  | 0.1±0.0 > + = 0.1±0.0 < 0.1±0.0 = 0.1±0.0 = 0.1±0.0 <             | 0.1±0.1 = 0.1±0.0 = 0.1±0.0 = 0.1±0.0 = 0.2±0.0 < 0.3±0.1 >     | 0.3±0.0 0.4±0.4  | 0.1±0.0 =  | 0.1±0.0 =  | 0.4±0.3 = | 0.3±0.2 =  |
| 20:4/16:0  | 0.1±0.1 = - < + < + > - < + =                                     | - = - = + < + > - < 0.1±0.1 =                                   | 0.1±0.2 +        | +          | =          | +         | 0.1±0.0 =  |
| 16:0/20:4  | 0.2±0.1 = 0.1±0.0 < 0.2±0.0 = 0.2±0.1 < 0.4±0.1 = 0.5±0.1 >       | 0.2±0.0 > 0.2±0.0 = 0.1±0.0 < 0.3±0.1 = 0.4±0.1 < 0.6±0.2 >     | 0.3±0.1 0.5±0.1  | 0.2±0.1 =  | 0.5±0.2 =  | 0.4±0.0 > | 0.4±0.0 =  |
| 18:1/18:2  | 0.6±0.0 = 0.6±0.1 > 0.5±0.0 = 0.5±0.1 = 0.3±0.1 < 0.7±0.3 =       | 0.4±0.1 = 0.6±0.1 = 0.5±0.1 = 0.6±0.1 > 0.4±0.1 = 0.4±0.1 =     | 0.4±0.0 0.7±0.1  | 0.5±0.1 =  | 1.1±0.3 =  | 0.3±0.0 = | 0.5±0.0 =  |
| 18:0/18:3  | 0.1±0.1 = + = 0.1±0.0 = 0.1±0.0 = 0.1±0.0 = 0.1±0.0 =             | 0.1±0.0 = 0.1±0.0 = 0.1±0.0 = 0.1±0.0 < 0.2±0.0 = 0.2±0.1 =     | 0.2±0.1 0.2±0.2  | 0.1±0.0 =  | 0.3±0.0 =  | 0.2±0.1 = | 0.1±0.0 =  |
| 18:0/18:3  | 1.1±0.1 > 0.8±0.1 > 0.5±0.1 > 0.3±0.0 < 0.6±0.1 > 0.3±0.1 =       | 0.9±0.2 > 0.4±0.0 = 0.4±0.1 > 0.2±0.0 = 0.2±0.1 < 0.6±0.1 >     | 0.8±0.2 0.3±0.1  | 1.0±0.2 =  | 0.2±0.0 =  | 0.8±0.1 = | 0.5±0.0 =  |
| 20:2/16:1  | 0.1±0.1 = 0.1±0.0 = + = + = 0.1±0.0 = + =                         | + = + > + = + = + = + =                                         | +                | -          | 0.1±0.0 =  | 0.1±0.0 = | +          |
| 18:1/18:1  | 0.4±0.1 = 0.3±0.1 = 0.2±0.1 = 0.2±0.0 = 0.1±0.1 = 0.4±0.4 =       | 0.2±0.1 = 0.2±0.0 > 0.2±0.0 < 0.2±0.0 > 0.1±0.0 = 0.1±0.1 <     | 0.2±0.1 0.2±0.0  | 0.4±0.1 =  | 0.3±0.1 =  | 0.3±0.0 = | 0.1±0.1 =  |
| 18:1/18:1  | 0.1±0.0 > - = - = - < 0.1±0.0 > + >                               | + > - < + > - < 0.1±0.0 = 0.1±0.0 >                             | 0.1±0.1 0.1±0.0  | -          | =          | 0.1±0.0 = | +          |
| 18:0/18:2  | 2.4±0.3 > 1.5±0.1 > 0.9±0.0 < 1.7±0.3 < 2.5±0.6 = 1.9±0.8 =       | 2.1±0.0 > 1.7±0.2 = 1.4±0.3 = 1.6±0.3 = 1.7±0.5 = 1.8±0.5 =     | 1.7±0.2 1.4±0.5  | 2.1±0.5 =  | 1.3±0.5 =  | 1.6±0.2 = | 1.3±0.1 =  |
| 18:0/18:1  | 3.4±0.1 > 0.9±0.2 > 0.4±0.1 = 0.7±0.3 = 1.0±0.2 < 2.2±0.9 >       | 2.4±0.3 > 1.1±0.1 > 0.8±0.1 = 0.7±0.1 = 0.7±0.1 < 1.4±0.6 >     | 1.5±0.5 0.9±0.3  | 2.8±0.1 <  | 1.8±0.2 =  | 2.2±0.0 = | 1.3±0.1 =  |
| 18:0/18:0  | + = 0.1±0.1 = + = + = - = 0.1±0.1 =                               | + = + > + = + = + < 0.1±0.1 >                                   | 0.2±0.2 0.1±0.1  | +          | =          | 0.3±0.3 = | 0.1±0.0 =  |
| 18:4/19:2  | 0.1±0.0 = 0.3±0.2 = 0.1±0.0 = 0.1±0.1 = 0.1±0.1 = 0.1±0.0 =       | 0.1±0.0 = 0.2±0.0 = 0.1±0.0 = 0.1±0.0 = 0.1±0.0 = 0.1±0.1 =     | 0.1±0.1 0.2±0.1  | 0.1±0.0 =  | 0.1±0.0 =  | 0.1±0.0 = | 0.2±0.0 =  |
| 18:3/19:2  | 0.1±0.0 > + = + = + = + < 0.1±0.0 =                               | 0.1±0.0 > + = + = + = + < 0.1±0.0 >                             | +                | +          | +          | =         | 0.1±0.1 =  |
| 19:2/18:3  | + = + > + = + > + < 0.1±0.0 =                                     | + < + = + = + = + = + =                                         | +                | +          | +          | =         | 0.1±0.0 =  |
| 19:1/18:3  | + > - < + > - < + > - =                                           | + = - = + < + > - < 0.1±0.0 >                                   | -                | -          | -          | =         | +          |
| 19:1/18:2  | + > - < + > - = - = - =                                           | + = - = - = - < + > - =                                         | +                | -          | -          | =         | -          |
| 19:1/18:1  | + = + = + = + > - < + >                                           | + = + = + = + > - < + =                                         | 0.1±0.0 +        | +          | =          | +         | +          |
| 18:1/19:0  | - = - = - = - = - = - =                                           | - = - = - = - = - = - =                                         | -                | -          | -          | =         | -          |
| 20:5/18:4  | + = + = + < + = + = - <                                           | + = + = + = + = + = 0.1±0.1 =                                   | 0.1±0.1 0.1±0.1  | +          | =          | 0.1±0.0 = | +          |
| 18:4/20:5  | + > - = + = + = + = + =                                           | + > - < + = + > - = - <                                         | +                | 0.1±0.0    | +          | =         | +          |
| 20:5/18:3  | + < 0.1±0.0 = 0.1±0.0 = 0.1±0.0 < 0.2±0.0 > + <                   | 0.1±0.0 = 0.1±0.0 = 0.1±0.0 = + < 0.2±0.1 = 0.1±0.1 =           | 0.2±0.0 0.3±0.2  | +          | =          | -         | 0.1±0.0 =  |
| 18:3/20:5  | - < + = + = + = + = + =                                           | + = + = + < + > + < 0.1±0.0 =                                   | +                | +          | +          | =         | +          |
| 20:4/18:3  | + = + = + = + = + = + =                                           | + = + = + = + = + < 0.1±0.0 >                                   | +                | 0.1±0.1    | +          | =         | +          |
| 18:3/20:4  | 0.1±0.1 = 0.1±0.0 = 0.1±0.0 = 0.1±0.0 < 0.2±0.0 > 0.1±0.0 <       | 0.1±0.0 = 0.1±0.0 = 0.1±0.0 = 0.1±0.0 = 0.1±0.1 > 0.1±0.0 <     | 0.1±0.1 0.1±0.1  | +          | =          | +         | 0.1±0.0 =  |
| 18:2/20:5  | + = + = + = + > - < + =                                           | - < + > + < + = + > - <                                         | -                | +          | +          | =         | -          |
| 18:3/20:3  | 0.1±0.1 = + = + = + = + = + =                                     | 0.1±0.0 > 0.1±0.0 = 0.1±0.0 = + = + = 0.1±0.0 =                 | 0.1±0.0 0.1±0.1  | +          | =          | +         | 0.1±0.1 =  |
| 18:2/20:4  | + = + = + = + = + = + =                                           | + = + = + < 0.1±0.0 = 0.1±0.1 = 0.1±0.0 =                       | +                | 0.1±0.1    | +          | =         | +          |
| 18:2/20:4  | + = + = + = + = + > + =                                           | + = + = + < 0.1±0.1 = 0.1±0.1 = 0.1±0.1 =                       | 0.1±0.0 0.1±0.1  | +          | =          | -         | 0.1±0.0 =  |
| 18:1/20:5  | + = + > + = + = + > - =                                           | + = + > + < + = + > - <                                         | +                | 0.1±0.0    | -          | =         | -          |
| 20:3/18:2  | + = + = + = + = + = + =                                           | + = + = + = + = + = 0.1±0.1 =                                   | +                | +          | +          | =         | 0.1±0.0 =  |
| 18:1/20:4  | + = + = + = + = + = 0.1±0.1 =                                     | + = + = + = + = 0.1±0.0 = 0.1±0.1 =                             | 0.2±0.1 0.2±0.1  | +          | =          | 0.1±0.0 = | 0.1±0.0 =  |
| 20:4/18:0  | + = + = + < + < + = + =                                           | + > + = + < + = + = 0.1±0.0 =                                   | +                | 0.1±0.1    | +          | =         | 0.1±0.0 =  |

|              |                                                                   |                                                                    |                   |            |            |            |            |
|--------------|-------------------------------------------------------------------|--------------------------------------------------------------------|-------------------|------------|------------|------------|------------|
| 18:0/20:4    | - < + > - = - = - = - =                                           | + = + > - = - < + < + >                                            | - -               | - =        | - =        | + =        | - =        |
| 20:5/20:5    | - = - = + = - < + > - =                                           | - = - = - = - < + > - =                                            | + -               | - =        | - =        | - =        | + =        |
| 20:4/20:5    | + = 0.1±0.0 = + = + = + = + =                                     | + = + = + = + = + = + =                                            | 0.1±0.0 +         | + =        | - =        | + =        | + =        |
| 18:3/16:1-OH | + = + < + = + = + = + =                                           | + < 0.1±0.0 = 0.1±0.0 = + = + = + =                                | + +               | + =        | - =        | 0.1±0.0 >  | + =        |
| 18:3/16:0-OH | 2.9±0.7 = 3.8±0.8 < 5.6±0.8 = 5.5±1.1 > 3.9±0.3 > 1.3±0.6 <       | 5.1±0.1 < 7.4±0.6 < 9.2±0.4 > 7.9±0.3 > 6.5±0.2 > 2.0±1.3 <        | 3.2±0.1 1.3±0.7   | 3.4±0.4 =  | 1.0±0.4 =  | 3.8±0.8 =  | 1.9±1.0 =  |
| 18:2/16:0-OH | 0.1±0.0 = + = 0.1±0.1 = 0.2±0.1 > 0.1±0.0 = 0.2±0.0 =             | 0.1±0.0 > 0.1±0.0 < 0.1±0.0 < 0.3±0.1 = 0.2±0.1 = 0.2±0.1 <        | + 0.1±0.1         | + =        | 0.1±0.1 =  | 0.1±0.0 =  | 0.1±0.1 =  |
| SFA/SFA      | 0.2±0.0 = 0.1±0.1 = 0.1±0.0 = 0.1±0.0 = 0.1±0.0 < 0.3±0.1 >       | 0.1±0.1 > 0.1±0.0 = + = + = 0.1±0.0 < 0.4±0.1 >                    | 0.3±0.2 0.5±0.2   | 0.1±0.0 =  | 0.4±0.4 =  | 0.2±0.1 =  | 0.2±0.1 =  |
| SFA/MUFA     | 18.0±2.6 > 7.8±1.0 > 6.2±0.6 = 8.0±1.9 < 10.7±0.5 < 17.9±5.3 >    | 17.8±0.9 > 10.8±0.7 = 9.3±1.2 = 9.2±0.3 < 10.6±0.4 = 13.0±3.1 >    | 18.0±2.1 12.0±1.7 | 17.5±0.3 = | 15.0±0.4 = | 19.0±0.3 = | 11.3±0.5 = |
| MUFA/SFA     | - = - = - = - = - = - = - =                                       | - = - = - = - = - = - = - =                                        | - -               | - =        | - =        | - =        | - =        |
| SFA/PUFA     | 15.5±1.1 = 16.1±0.9 < 19.1±2.2 < 27.9±1.3 = 29.8±1.6 > 18.1±2.7 < | 13.7±0.4 < 17.6±1.7 = 18.0±1.5 < 21.6±1.4 = 22.5±1.0 > 18.6±1.2 <  | 14.0±0.5 15.2±0.7 | 16.1±1.6 = | 18.8±1.6 = | 15.9±1.4 = | 15.3±0.7 < |
| PUFA/SFA     | 14.7±0.9 > 12.9±0.3 < 17.7±0.9 > 13.5±1.1 = 13.8±0.7 < 28.0±3.5 > | 12.7±0.2 < 13.5±0.2 < 16.5±1.0 > 11.8±0.9 = 12.4±0.3 = 17.8±5.1 >  | 10.7±0.5 14.5±4.7 | 15.9±1.0 = | 33.1±3.4 = | 11.3±0.2 < | 20.9±2.8 = |
| MUFA/MUFA    | 0.7±0.1 > 0.4±0.1 = 0.3±0.1 = 0.3±0.0 = 0.2±0.1 = 0.6±0.3 =       | 0.5±0.1 = 0.5±0.1 > 0.3±0.1 < 0.7±0.3 = 0.7±0.1 = 0.6±0.0 =        | 0.7±0.0 1.1±0.6   | 0.6±0.1 =  | 0.5±0.2 =  | 1.2±0.2 =  | 0.5±0.3 =  |
| MUFA/PUFA    | 0.9±0.1 = 0.9±0.1 > 0.6±0.1 = 0.7±0.2 = 0.5±0.1 = 0.9±0.4 =       | 0.8±0.2 = 0.9±0.1 = 0.8±0.1 = 0.8±0.1 = 0.6±0.2 = 0.8±0.2 =        | 0.9±0.2 1.1±0.1   | 0.8±0.0 =  | 1.3±0.4 =  | 0.9±0.0 =  | 0.9±0.2 =  |
| PUFA/ MUFA   | 24.6±3.3 < 29.6±2.7 = 29.9±3.7 = 34.0±5.2 > 24.5±1.1 > 16.1±6.9 < | 39.2±1.1 > 34.7±1.5 = 36.6±3.5 < 48.0±1.5 > 40.9±3.3 = 29.9±11.2 < | 34.9±3.2 27.8±7.8 | 24.7±0.8 = | 10.9±6.3 = | 38.3±2.5 = | 32.0±2.0 = |
| PUFA/PUFA    | 25.3±5.2 = 32.1±3.2 > 26.0±1.1 > 15.3±4.9 = 20.3±1.6 = 17.8±6.3 = | 14.8±0.2 < 21.7±1.8 > 18.2±1.2 > 7.8±0.5 < 11.8±2.8 = 18.6±10.6 =  | 20.2±1.1 27.4±3.7 | 24.0±3.0 = | 19.9±1.8 = | 12.5±0.9 = | 18.7±0.4 = |

| PE        | The lower part of the blades of infected <i>U. pinnatifida</i> samples |      |         |      |         |      |         | The upper intact part of the blades of infected <i>U. pinnatifida</i> samples |         |      |         |         |         |         | The upper part of the blades of infected <i>U. pinnatifida</i> samples with endophyte | The lower part of the blades of uninfected <i>U. pinnatifida</i> samples |         | The upper part of the blades of uninfected <i>U. pinnatifida</i> samples |         |      |         |         |         |         |         |         |         |         |         |         |         |         |         |   |         |   |
|-----------|------------------------------------------------------------------------|------|---------|------|---------|------|---------|-------------------------------------------------------------------------------|---------|------|---------|---------|---------|---------|---------------------------------------------------------------------------------------|--------------------------------------------------------------------------|---------|--------------------------------------------------------------------------|---------|------|---------|---------|---------|---------|---------|---------|---------|---------|---------|---------|---------|---------|---------|---|---------|---|
|           | Nov.                                                                   | Dec. | Jan.    | Feb. | Apr.    | Jun. | T       | Nov.                                                                          | Dec.    | Jan. | Feb.    | Apr.    | Jun.    | T       |                                                                                       | Nov.                                                                     | Jun.    | Nov.                                                                     | S       | Jun. | S       | Nov.    | S       | Jun.    | S       |         |         |         |         |         |         |         |         |   |         |   |
| 16:1/14:0 | -                                                                      | =    | -       | <    | +       | <    | +       | =                                                                             | +       | >    | -       | <       | +       | >       | -                                                                                     | <                                                                        | +       | 0.3±0.2                                                                  | >       | +    | 0.4±0.3 | -       | =       | -       | =       | +       | =       | 0.1±0.1 | =       |         |         |         |         |   |         |   |
| 15:0/15:0 | -                                                                      | =    | -       | =    | -       | <    | +       | >                                                                             | -       | =    | -       | <       | +       | >       | +                                                                                     | =                                                                        | +       | =                                                                        | +       | +    | +       | =       | +       | =       | +       | =       | +       | =       | +       | =       |         |         |         |   |         |   |
| 16:1/16:1 | +                                                                      | =    | +       | =    | +       | =    | +       | =                                                                             | +       | =    | 0.1±0.1 | =       | 0.1±0.0 | =       | 0.2±0.1                                                                               | =                                                                        | 0.1±0.1 | <                                                                        | 0.3±0.1 | >    | 0.2±0.1 | <       | 0.4±0.1 | =       | 0.3±0.2 | 0.9±0.7 | +       | =       | 0.3±0.0 | =       | 0.2±0.2 | =       |         |   |         |   |
| 14:0/18:2 | 0.1±0.0                                                                | =    | +       | =    | +       | =    | +       | =                                                                             | +       | =    | +       | =       | +       | =       | 0.1±0.0                                                                               | =                                                                        | 0.1±0.0 | =                                                                        | 0.1±0.0 | =    | 0.1±0.0 | =       | 0.1±0.1 | =       | 0.1±0.0 | 0.1±0.0 | 0.1±0.0 | =       | +       | =       | +       | =       |         |   |         |   |
| 14:0/18:1 | 0.1±0.0                                                                | >    | +       | <    | +       | =    | +       | =                                                                             | +       | =    | <       | 0.1±0.0 | =       | 0.1±0.0 | =                                                                                     | +                                                                        | <       | 0.1±0.0                                                                  | >       | +    | =       | 0.2±0.2 | =       | 0.2±0.0 | 0.4±0.3 | 0.1±0.0 | =       | 0.1±0.0 | =       | 0.1±0.0 | =       | 0.1±0.2 | =       |   |         |   |
| 16:0/16:1 | +                                                                      | >    | -       | <    | +       | >    | -       | <                                                                             | +       | =    | +       | >       | +       | >       | -                                                                                     | <                                                                        | +       | =                                                                        | +       | <    | +       | =       | +       | >       | +       | +       | -       | =       | +       | =       | -       | =       | -       | = |         |   |
| 16:0/16:0 | +                                                                      | >    | +       | <    | +       | =    | +       | =                                                                             | +       | <    | 0.1±0.0 | >       | +       | >       | +                                                                                     | =                                                                        | +       | =                                                                        | +       | =    | +       | =       | +       | =       | +       | +       | +       | =       | +       | =       | +       | =       | +       | = |         |   |
| 16:3/18:4 | +                                                                      | >    | -       | <    | +       | =    | +       | >                                                                             | -       | =    | -       | <       | +       | >       | -                                                                                     | <                                                                        | +       | >                                                                        | +       | >    | -       | <       | +       | >       | +       | +       | +       | =       | +       | =       | +       | =       | -       | = |         |   |
| 16:3/18:3 | +                                                                      | =    | +       | =    | +       | =    | -       | <                                                                             | +       | >    | -       | =       | +       | >       | -                                                                                     | <                                                                        | +       | <                                                                        | +       | >    | +       | +       | +       | +       | +       | +       | +       | =       | +       | =       | +       | =       | +       | = |         |   |
| 20:5/14:0 | +                                                                      | =    | +       | =    | +       | =    | +       | >                                                                             | +       | =    | +       | =       | +       | =       | +                                                                                     | =                                                                        | +       | =                                                                        | +       | =    | +       | =       | +       | =       | +       | +       | +       | =       | +       | =       | +       | =       | +       | = |         |   |
| 14:0/20:5 | 1.1±0.2                                                                | <    | 1.4±0.1 | =    | 1.4±0.3 | =    | 1.6±0.5 | =                                                                             | 1.9±0.3 | >    | 0.4±0.1 | <       | 1.0±0.2 | =       | 1.0±0.0                                                                               | >                                                                        | 0.8±0.0 | =                                                                        | 0.8±0.2 | <    | 1.0±0.1 | >       | 0.6±0.1 | =       | 1.1±0.1 | 1.0±0.1 | 1.6±0.1 | >       | 0.2±0.1 | =       | 1.2±0.0 | =       | 0.6±0.1 | = |         |   |
| 14:0/20:4 | 0.1±0.0                                                                | =    | 0.1±0.0 | =    | 0.1±0.0 | =    | 0.1±0.0 | =                                                                             | 0.1±0.0 | >    | +       | =       | +       | =       | 0.1±0.0                                                                               | <                                                                        | 0.1±0.0 | =                                                                        | 0.1±0.0 | =    | +       | =       | +       | =       | 0.1±0.1 | +       | 0.2±0.0 | =       | +       | =       | 0.1±0.0 | =       | +       | = |         |   |
| 14:0/20:4 | 3.6±0.7                                                                | >    | 1.1±0.1 | =    | 1.2±0.2 | =    | 1.1±0.3 | <                                                                             | 2.0±0.3 | <    | 3.9±0.6 | >       | 1.9±0.2 | >       | 1.2±0.1                                                                               | >                                                                        | 1.0±0.1 | =                                                                        | 0.9±0.1 | =    | 1.0±0.1 | <       | 2.4±0.3 | >       | 1.7±0.5 | 2.3±0.8 | 4.1±0.2 | =       | 3.6±0.1 | =       | 1.8±0.0 | =       | 2.6±0.3 | = |         |   |
| 18:2/16:1 | +                                                                      | =    | +       | =    | +       | =    | +       | =                                                                             | +       | =    | +       | =       | +       | =       | +                                                                                     | =                                                                        | +       | =                                                                        | 0.2±0.3 | =    | +       | <       | +       | =       | 0.1±0.0 | 0.1±0.0 | +       | =       | +       | =       | +       | =       | +       | = |         |   |
| 18:2/16:1 | -                                                                      | =    | -       | =    | -       | <    | +       | =                                                                             | +       | =    | +       | =       | +       | >       | -                                                                                     | <                                                                        | +       | <                                                                        | 0.4±0.2 | >    | +       | <       | 0.1±0.1 | <       | 0.1±0.0 | 0.2±0.1 | +       | =       | -       | =       | 0.4±0.0 | =       | -       | = |         |   |
| 18:1/16:2 | 0.1±0.0                                                                | >    | +       | =    | 0.1±0.0 | =    | +       | <                                                                             | 0.1±0.0 | =    | 0.1±0.0 | =       | 0.1±0.0 | =       | 0.2±0.1                                                                               | =                                                                        | 0.1±0.1 | =                                                                        | 0.1±0.0 | =    | 0.1±0.0 | =       | 0.1±0.0 | =       | 0.2±0.2 | 0.1±0.0 | 0.2±0.1 | =       | -       | =       | 0.2±0.2 | =       | 0.1±0.1 | = |         |   |
| 16:0/18:3 | 0.3±0.0                                                                | >    | 0.2±0.0 | =    | 0.3±0.1 | >    | 0.1±0.0 | <                                                                             | 0.2±0.0 | =    | 0.2±0.2 | =       | 0.1±0.1 | =       | 0.1±0.0                                                                               | =                                                                        | 0.1±0.0 | >                                                                        | 0.1±0.0 | =    | 0.1±0.0 | =       | 0.1±0.0 | =       | 0.1±0.1 | +       | 0.4±0.1 | =       | 0.2±0.0 | =       | 0.1±0.0 | =       | 0.1±0.0 | = |         |   |
| 18:1/16:1 | +                                                                      | =    | +       | =    | +       | =    | +       | =                                                                             | +       | =    | +       | =       | +       | =       | 0.2±0.1                                                                               | =                                                                        | 0.2±0.2 | =                                                                        | 0.1±0.1 | <    | 0.4±0.1 | =       | 0.3±0.1 | =       | 0.7±0.4 | =       | 0.7±0.3 | 1.8±1.5 | 0.1±0.0 | =       | +       | =       | 1.0±0.1 | > | 0.4±0.5 | = |
| 16:0/18:2 | 0.4±0.1                                                                | >    | 0.2±0.1 | =    | 0.2±0.0 | =    | 0.1±0.1 | =                                                                             | 0.2±0.1 | <    | 0.5±0.1 | >       | 0.2±0.1 | =       | 0.2±0.0                                                                               | =                                                                        | 0.2±0.1 | =                                                                        | 0.2±0.0 | =    | 0.1±0.0 | =       | 0.1±0.0 | =       | 0.1±0.0 | 0.1±0.0 | 0.3±0.0 | =       | 0.4±0.2 | =       | 0.1±0.1 | =       | 0.3±0.2 | = |         |   |
| 16:0/18:1 | 0.2±0.1                                                                | >    | +       | >    | +       | =    | +       | =                                                                             | +       | <    | 0.3±0.1 | >       | 0.1±0.0 | =       | +                                                                                     | =                                                                        | +       | =                                                                        | 0.1±0.0 | >    | +       | =       | 0.1±0.1 | =       | 0.2±0.3 | 0.2±0.1 | 0.1±0.0 | =       | 0.2±0.0 | =       | 0.1±0.0 | =       | 0.1±0.0 | = |         |   |

|           |          |   |          |   |          |   |          |   |          |   |          |   |         |   |         |   |         |   |         |   |         |   |          |         |         |          |          |         |          |   |         |   |          |   |   |   |
|-----------|----------|---|----------|---|----------|---|----------|---|----------|---|----------|---|---------|---|---------|---|---------|---|---------|---|---------|---|----------|---------|---------|----------|----------|---------|----------|---|---------|---|----------|---|---|---|
| 18:0/16:0 | +        | > | -        | < | +        | > | +        | = | +        | = | +        | = | +       | = | +       | = | -       | = | -       | = | -       | = | -        | =       | -       | =        |          |         |          |   |         |   |          |   |   |   |
| 18:4/17:2 | -        | = | -        | = | +        | = | +        | = | +        | > | -        | < | -       | = | -       | = | -       | < | +       | > | -       | = | -        | <       | +       | -        | +        | =       | +        | = | +       | = | -        | = |   |   |
| 20:5/15:0 | 0.1±0.0  | = | 0.1±0.0  | = | 0.1±0.0  | = | 0.1±0.0  | = | 0.1±0.0  | > | +        | < | 0.1±0.0 | = | 0.1±0.0 | < | 0.1±0.0 | > | 0.1±0.0 | = | 0.1±0.0 | = | 0.2±0.0  | =       | 0.2±0.0 | 0.2±0.1  | 0.1±0.0  | =       | +        | = | 0.1±0.0 | = | 0.1±0.2  | = |   |   |
| 20:4/15:0 | 0.2±0.0  | > | 0.1±0.0  | = | 0.1±0.0  | = | 0.1±0.0  | = | 0.1±0.0  | < | 0.2±0.0  | > | 0.2±0.1 | > | 0.1±0.0 | = | 0.1±0.0 | = | 0.1±0.0 | < | 0.5±0.1 | > | 0.2±0.1  | 0.6±0.2 | 0.2±0.0 | >        | 0.3±0.1  | =       | 0.2±0.0  | = | 0.5±0.2 | = |          |   |   |   |
| 17:1/18:2 | -        | = | -        | < | +        | = | +        | > | +        | > | -        | < | -       | = | -       | = | -       | < | +       | = | +       | > | -        | <       | -       | +        | -        | =       | -        | = | -       | = | +        | = |   |   |
| 18:3/18:4 | 0.1±0.0  | < | 0.2±0.0  | > | 0.1±0.0  | > | +        | = | 0.1±0.0  | = | +        | = | +       | < | 0.1±0.1 | = | 0.1±0.0 | > | +       | > | +       | = | +        | <       | 0.1±0.0 | +        | 0.1±0.0  | =       | +        | = | +       | = | +        | = |   |   |
| 18:4/18:3 | +        | = | 0.1±0.0  | < | 0.2±0.1  | = | 0.1±0.0  | = | 0.1±0.0  | > | +        | < | +       | = | +       | = | 0.1±0.0 | > | +       | < | 0.1±0.0 | > | +        | =       | +       | +        | 0.1±0.0  | =       | +        | = | +       | < | +        | = |   |   |
| 18:3/18:3 | 0.1±0.1  | < | 0.2±0.0  | > | 0.1±0.1  | = | 0.1±0.0  | = | 0.1±0.0  | > | +        | = | +       | < | 0.2±0.0 | > | 0.1±0.0 | = | +       | = | +       | = | +        | =       | +       | +        | 0.1±0.0  | 0.2±0.0 | =        | + | =       | + | =        | + | = |   |
| 16:1/20:5 | 0.1±0.0  | < | 0.4±0.1  | = | 0.5±0.1  | = | 0.5±0.2  | > | 0.2±0.0  | > | 0.1±0.1  | < | 0.1±0.0 | < | 0.2±0.0 | = | 0.3±0.1 | = | 0.3±0.1 | = | 0.2±0.1 | > | 0.1±0.1  | <       | 0.1±0.1 | 0.2±0.1  | 0.1±0.0  | =       | 0.1±0.0  | = | 0.2±0.1 | = | 0.1±0.0  | = |   |   |
| 18:3/18:2 | 0.1±0.0  | < | 0.2±0.1  | = | 0.2±0.1  | > | +        | < | 0.1±0.0  | = | +        | = | +       | = | 0.1±0.0 | = | 0.1±0.0 | = | +       | = | +       | = | +        | =       | +       | +        | 0.1±0.0  | =       | 0.1±0.0  | = | +       | = | +        | = | + | = |
| 18:2/18:3 | +        | = | +        | = | +        | > | +        | = | +        | = | +        | = | 0.1±0.0 | > | +       | = | +       | = | +       | = | +       | = | +        | =       | +       | +        | +        | =       | +        | = | +       | = | +        | = | + | = |
| 16:1/20:4 | 0.3±0.1  | = | 0.3±0.0  | = | 0.3±0.1  | = | 0.3±0.0  | = | 0.2±0.1  | = | 0.2±0.0  | < | 0.1±0.0 | < | 0.2±0.0 | = | 0.2±0.1 | = | 0.2±0.0 | = | 0.2±0.0 | > | 0.1±0.0  | <       | 0.2±0.1 | 0.2±0.1  | 0.3±0.0  | =       | 0.1±0.0  | = | 0.1±0.1 | = | 0.1±0.0  | = |   |   |
| 16:0/20:5 | 5.3±1.0  | < | 10.1±0.3 | < | 12.7±2.2 | = | 11.9±0.8 | = | 10.9±0.5 | > | 2.2±0.8  | < | 5.5±0.3 | < | 7.4±0.8 | < | 8.4±0.2 | = | 8.4±0.1 | < | 9.8±0.2 | > | 3.8±0.4  | <       | 6.4±0.3 | 6.3±0.5  | 6.2±0.4  | =       | 1.7±0.2  | = | 7.5±0.6 | = | 3.3±1.7  | = |   |   |
| 18:2/18:2 | +        | = | +        | = | +        | = | 0.1±0.0  | = | +        | = | 0.1±0.0  | = | +       | = | +       | > | +       | < | +       | = | +       | = | +        | =       | +       | +        | +        | =       | -        | = | +       | = | -        | = |   |   |
| 18:3/18:1 | +        | = | -        | < | +        | = | +        | = | +        | = | +        | = | +       | > | -       | < | +       | = | +       | = | +       | = | +        | =       | 0.1±0.0 | 0.1±0.1  | +        | =       | +        | = | +       | = | +        | = |   |   |
| 20:4/16:0 | 0.6±0.2  | = | 0.7±0.0  | = | 0.8±0.3  | = | 0.6±0.1  | = | 0.6±0.0  | > | 0.1±0.1  | < | 0.3±0.1 | = | 0.3±0.1 | = | 0.4±0.1 | = | 0.4±0.1 | > | 0.3±0.1 | > | 0.1±0.0  | <       | 0.5±0.1 | 0.2±0.1  | 0.7±0.1  | =       | 0.1±0.1  | = | 0.2±0.0 | = | 0.3±0.1  | = |   |   |
| 16:0/20:4 | 11.2±0.6 | > | 4.3±0.4  | < | 5.4±0.4  | < | 6.3±0.6  | < | 8.0±0.4  | < | 19.1±1.5 | > | 9.1±0.3 | > | 6.0±0.1 | = | 6.2±0.4 | < | 8.7±0.9 | = | 8.3±0.8 | < | 15.8±3.1 | >       | 7.5±0.5 | 13.3±1.5 | 12.7±0.5 | =       | 19.8±1.8 | = | 9.5±0.2 | = | 15.2±1.0 | = |   |   |
| 18:1/18:2 | 0.1±0.0  | = | +        | = | +        | = | +        | = | +        | = | +        | = | +       | = | +       | = | +       | = | +       | = | +       | = | +        | =       | 0.1±0.0 | 0.1±0.0  | +        | =       | 0.1±0.0  | = | 0.1±0.0 | > | 0.1±0.0  | = |   |   |
| 16:0/20:3 | 0.4±0.0  | > | 0.3±0.1  | = | 0.4±0.0  | = | 0.3±0.0  | = | 0.4±0.0  | = | 0.3±0.0  | > | 0.2±0.1 | = | 0.2±0.1 | = | 0.2±0.1 | = | 0.3±0.0 | > | 0.2±0.0 | = | 0.2±0.2  | =       | 0.1±0.1 | 0.2±0.0  | 0.5±0.1  | =       | 0.4±0.0  | > | 0.2±0.0 | = | 0.2±0.1  | = |   |   |
| 18:1/18:1 | +        | = | +        | = | +        | = | +        | = | +        | = | +        | = | +       | = | +       | = | +       | = | +       | = | +       | = | +        | =       | 0.1±0.1 | 0.1±0.0  | +        | =       | +        | = | 0.1±0.0 | > | 0.1±0.1  | = |   |   |
| 18:1/18:1 | 0.1±0.1  | = | +        | > | +        | < | +        | < | 0.1±0.0  | > | +        | = | +       | > | +       | = | +       | < | +       | = | 0.1±0.0 | = | 0.1±0.1  | =       | 0.1±0.1 | 0.1±0.1  | +        | =       | +        | = | +       | = | +        | = |   |   |
| 18:0/18:2 | 0.1±0.0  | = | 0.1±0.0  | = | 0.1±0.0  | = | +        | > | +        | = | +        | = | 0.1±0.0 | = | +       | = | 0.1±0.0 | > | +       | = | +       | = | +        | =       | 0.1±0.1 | +        | 0.1±0.0  | =       | +        | = | +       | = | +        | = |   |   |
| 16:0/20:1 | -        | = | -        | < | +        | = | +        | > | -        | = | -        | < | -       | = | -       | < | +       | > | -       | < | +       | > | -        | =       | -       | -        | +        | =       | +        | = | +       | = | -        | = |   |   |
| 18:0/18:1 | +        | > | +        | = | +        | = | +        | < | +        | = | +        | > | +       | = | +       | = | +       | = | +       | = | +       | = | +        | >       | +       | +        | +        | =       | -        | = | 0.1±0.1 | = | +        | = |   |   |
| 18:0/18:0 | 0.1±0.0  | = | +        | = | +        | > | +        | = | +        | < | 0.1±0.1  | > | +       | = | +       | = | +       | > | +       | < | 0.1±0.1 | > | 0.1±0.0  | 0.1±0.0 | +       | =        | 0.2±0.0  | =       | +        | = | 0.1±0.0 | = |          |   |   |   |
| 20:5/18:5 | +        | < | +        | = | +        | > | +        | = | +        | = | +        | = | +       | < | +       | = | 0.1±0.0 | = | +       | = | +       | < | +        | =       | +       | +        | +        | =       | 0.1±0.0  | = | +       | = | +        | = |   |   |
| 20:5/18:4 | 0.5±0.1  | < | 1.1±0.0  | > | 0.7±0.0  | > | 0.2±0.1  | < | 0.4±0.0  | > | 0.2±0.1  | = | 0.3±0.0 | < | 0.8±0.1 | = | 0.7±0.1 | > | 0.2±0.0 | = | 0.2±0.1 | = | 0.2±0.1  | =       | 0.5±0.1 | 1.0±0.2  | 0.8±0.0  | =       | 0.1±0.1  | = | 0.3±0.0 | = | 0.2±0.1  | = |   |   |
| 18:4/20:5 | +        | = | +        | = | +        | = | +        | = | +        | = | +        | = | +       | = | +       | = | +       | < | +       | = | +       | = | +        | =       | +       | 0.1±0.1  | +        | =       | -        | = | +       | = | -        | = |   |   |
| 20:3/18:5 | +        | > | +        | = | +        | = | +        | > | -        | = | -        | < | +       | = | +       | = | +       | = | +       | = | +       | > | -        | <       | +       | +        | -        | =       | -        | = | -       | = | -        | = |   |   |
| 20:5/18:3 | 0.5±0.0  | < | 4.6±0.8  | = | 3.6±1.0  | > | 1.9±0.4  | = | 1.8±0.1  | > | 0.1±0.1  | < | 0.5±0.0 | < | 2.7±0.5 | = | 2.8±0.8 | > | 0.9±0.2 | < | 1.2±0.1 | > | 0.2±0.2  | <       | 0.7±0.2 | 0.2±0.1  | 0.8±0.0  | >       | 0.3±0.0  | = | 0.5±0.0 | = | 0.2±0.2  | = |   |   |
| 18:3/20:5 | 1.4±0.3  | = | 1.4±0.2  | = | 1.2±0.4  | = | 1.1±0.8  | = | 0.8±0.1  | = | 1.0±0.2  | = | 0.4±0.2 | < | 1.1±0.1 | = | 1.2±0.1 | = | 0.4±0.0 | = | 0.4±0.1 | = | 0.7±0.4  | =       | 0.8±0.4 | 1.4±0.5  | 1.5±0.3  | =       | 0.7±0.0  | = | 0.3±0.1 | = | 0.6±0.1  | = |   |   |
| 20:4/18:4 | +        | = | +        | < | +        | > | +        | = | +        | = | +        | = | +       | = | +       | = | +       | = | +       | = | +       | = | +        | =       | 0.1±0.0 | +        | +        | =       | +        | = | +       | = | +        | = |   |   |
| 18:4/20:4 | +        | = | +        | < | +        | = | +        | = | +        | = | +        | > | -       | < | +       | = | +       | < | +       | = | +       | = | +        | =       | 0.1±0.0 | +        | +        | =       | -        | = | +       | = | +        | = |   |   |
| 20:4/18:3 | 2.6±0.5  | < | 8.4±1.1  | = | 7.8±2.0  | = | 6.4±1.4  | = | 5.4±0.3  | > | 1.5±0.7  | < | 2.0±0.4 | < | 6.5±0.5 | > | 5.6±0.5 | > | 4.5±0.6 | = | 4.4±0.3 | > | 1.1±0.4  | <       | 2.0±0.3 | 1.4±0.1  | 3.2±0.2  | =       | 1.2±0.0  | = | 1.7±0.1 | = | 1.1±0.0  | = |   |   |
| 18:3/20:4 | 0.1±0.0  | = | 0.1±0.0  | = | 0.1±0.0  | > | +        | = | 0.1±0.0  | = | 0.1±0.0  | > | 0.1±0.0 | = | 0.1±0.0 | = | 0.1±0.0 | = | 0.1±0.0 | = | 0.1±0.0 | = | 0.1±0.0  | =       | 0.1±0.0 | +        | 0.1±0.0  | =       | 0.1±0.0  | = | 0.1±0.0 | = | 0.1±0.0  | = |   |   |
| 20:4/18:3 | +        | = | +        | = | +        | = | +        | > | +        | > | -        | < | +       | = | +       | = | +       | = | +       | = | +       | = | +        | =       | +       | +        | +        | =       | +        | = | +       | = | +        | = |   |   |
| 18:3/20:3 | +        | < | +        | = | +        | < | 0.2±0.1  | = | 0.3±0.0  | > | +        | < | +       | < | +       | = | +       | < | 0.1±0.1 | = | 0.1±0.0 | > | +        | <       | 0.1±0.0 | +        | +        | =       | +        | = | +       | = | +        | = |   |   |
| 20:4/18:2 | +        | > | -        | = | -        | = | 0.2±0.2  | = | -        | = | -        | = | +       | = | -       | = | -       | < | 0.1±0.1 | > | +       | > | -        | <       | -       | +        | -        | =       | -        | = | -       | = | +        | = |   |   |
| 18:2/20:4 | 1.7±0.3  | = | 1.8±0.3  | = | 2.0±0.4  | = | 2.4±0.5  | = | 2.4±0.2  | = | 2.5±0.4  | = | 1.5±0.0 | < | 2.9±0.7 | = | 2.3±0.2 | < | 2.8±0.4 | = | 2.8±0.2 | > | 1.8±0.3  | <       | 1.3±0.2 | 1.4±0.2  | 1.8±0.4  | =       | 2.5±0.3  | = | 1.3±0.1 | = | 1.9±0.3  | = |   |   |
| 18:1/20:5 | 1.4±0.2  | < | 4.0±0.6  | > | 2.8±0.4  | = | 2.3±0.4  | = | 2.1±0.1  | > | 0.3±0.2  | < | 0.8±0.0 | < | 1.4±0.4 | = | 1.4±0.1 | > | 1.0±0.0 | = | 0.8±0.2 | > | 0.2±0.0  | <       | 0.8±0.0 | 0.4±0.1  | 1.4±0.1  | =       | 0.3±0.2  | = | 0.7±0.0 | = | 0.2±0.0  | = |   |   |
| 18:1/20:5 | +        | < | +        | = | +        | = | +        | = | +        | = | +        | = | +       | < | +       | = | +       | = | +       | = | +       | = | +        | =       | 0.1±0.0 | +        | +        | =       | +        | = | +       | = | +        | = |   |   |
| 16:1/22:5 | +        | = | +        | = | +        | = | +        | = | +        | = | +        | = | +       | = | +       | = | +       | > | +       | = | +       | = | +        | =       | +       | +        | +        | =       | -        | = | +       | = | +        | = |   |   |
| 16:0/22:6 | +        | = | +        | = | +        | = | +        | = | +        | = | +        | = | +       | = | +       | = | +       | = | +       | = | +       | = | +        | =       | -       | +        | +        | =       | +        | = | +       | = | +        | = |   |   |

|            |                                                                   |                                                               |                  |            |            |            |            |   |   |   |
|------------|-------------------------------------------------------------------|---------------------------------------------------------------|------------------|------------|------------|------------|------------|---|---|---|
| 18:2/20:3  | 0.1±0.0 < 0.1±0.0 = 0.1±0.0 = 0.1±0.1 = 0.1±0.0 > + <             | 0.1±0.0 = 0.1±0.0 = 0.1±0.0 = 0.1±0.0 > 0.1±0.0 > + <         | 0.1±0.0 0.1±0.0  | 0.1±0.0 =  | +          | =          | +          | = | + | = |
| 18:1/20:4  | 1.7±0.4 > 1.0±0.2 > 0.8±0.1 = 0.9±0.3 = 1.0±0.1 < 1.8±0.5 >       | 0.8±0.1 = 0.8±0.3 = 0.6±0.0 = 0.6±0.1 > 0.5±0.1 = 0.4±0.1 =   | 0.5±0.1 0.4±0.1  | 1.5±0.0 =  | 1.6±0.4 =  | 0.6±0.0 <  | 0.4±0.1 =  |   |   |   |
| 18:0/20:5  | 1.3±0.4 = 1.6±0.2 > 1.0±0.1 < 1.3±0.1 < 1.7±0.3 > 0.6±0.2 <       | 1.5±0.1 = 1.3±0.3 = 1.3±0.0 = 1.1±0.4 = 1.2±0.4 = 1.1±0.7 =   | 1.7±0.1 1.5±0.7  | 1.2±0.2 =  | 0.4±0.3 =  | 1.4±0.1 =  | 1.0±0.3 =  |   |   |   |
| 18:1/20:3  | + > + = + < + = + = - <                                           | + = + < + = + = + = - <                                       | + +              | + =        | - =        | - =        | - =        |   |   |   |
| 20:4/18:0  | 0.1±0.1 = 0.1±0.0 > + = + = + = 0.1±0.0 =                         | + = + = + = + = + = + < + =                                   | + +              | 0.1±0.0 =  | - =        | +          | +          |   |   |   |
| 18:0/20:4  | 2.2±0.2 > 0.7±0.2 = 0.4±0.1 < 0.7±0.1 < 1.1±0.1 < 4.2±0.8 >       | 2.6±0.2 > 1.1±0.1 = 1.0±0.1 = 1.0±0.2 = 1.1±0.2 < 4.2±1.2 >   | 1.9±0.1 2.9±0.4  | 2.2±0.1 =  | 3.9±0.5 =  | 2.0±0.3 =  | 4.7±1.2 =  |   |   |   |
| 20:5/20:5  | 3.4±0.6 < 10.4±1.0 = 9.7±0.5 > 6.5±0.3 = 6.2±0.2 > 0.4±0.3 <      | 3.9±0.5 < 8.7±0.6 = 9.8±1.3 > 4.6±0.9 = 4.8±0.3 > 1.1±0.6 <   | 6.8±0.7 4.9±0.7  | 3.6±0.1 =  | 0.1±0.0 =  | 5.1±0.2 >  | 0.8±0.3 =  |   |   |   |
| 22:5/18:4  | 0.4±0.0 < 1.2±0.2 > 0.8±0.2 = 0.7±0.2 = 0.7±0.1 > + <             | 0.4±0.1 < 0.7±0.1 < 0.9±0.1 > 0.5±0.3 = 0.6±0.1 > 0.1±0.1 <   | 0.8±0.1 0.5±0.1  | 0.4±0.0 =  | +          | 0.8±0.0 >  | 0.2±0.1 =  |   |   |   |
| 20:4/20:5  | 24.0±1.5 < 27.0±1.4 = 28.4±4.5 = 29.9±2.6 > 25.5±0.7 > 9.1±3.2 <  | 28.2±0.9=29.5±1.5=30.9±2.9 = 29.8±1.1 < 32.0±1.3 > 13.0±3.3 < | 30.3±0.419.7±1.4 | 22.3±3.3 = | 6.6±1.6 =  | 28.8±1.0 = | 12.7±3.6 = |   |   |   |
| 18:3/22:5  | + < + = + = + = + = + =                                           | + = + = + = + = + = + < + =                                   | + 0.1±0.0        | + =        | +          | +          | +          |   |   |   |
| 20:3/20:5+ | 2.1±0.3 < 2.9±0.2 > 2.5±0.1 = 2.6±0.5 = 2.6±0.1 > 0.4±0.1 <       | 1.5±0.2 < 2.5±0.1 = 2.8±0.4 = 2.5±0.4 > 1.9±0.3 > 0.7±0.1 <   | 2.0±0.3 1.0±0.1  | 2.8±0.6 =  | 0.4±0.1 =  | 1.9±0.1 =  | 0.8±0.3 =  |   |   |   |
| 20:5/20:3  |                                                                   |                                                               |                  |            |            |            |            |   |   |   |
| 20:4/20:4  | 25.1±0.8 > 8.2±1.3 = 9.9±2.2 = 13.1±1.8 < 15.5±0.7 < 41.2±4.9 >   | 29.5±0.2>15.1±2.6=13.9±0.8 < 21.4±2.0 > 18.5±0.9 < 38.4±3.8 > | 22.5±0.725.6±2.8 | 21.5±0.6 < | 46.1±2.5 = | 24.6±1.5 = | 38.9±5.4 = |   |   |   |
| 20:4/20:3  | 1.0±0.1 > 0.3±0.3 = 0.1±0.2 < 0.7±0.4 = 0.7±0.3 > 0.1±0.0 <       | 0.1±0.1 = 0.1±0.2 < 0.8±0.3 = 0.8±0.4 = 0.7±0.1 > 0.3±0.2 =   | 0.1±0.1 0.1±0.1  | 0.6±0.9 =  | 0.8±0.0 >  | +          | 0.1±0.0 =  |   |   |   |
| 20:3/20:4  | 0.4±0.2 = 0.4±0.1 = 0.4±0.0 = 0.3±0.4 = 0.6±0.1 = 0.8±0.1 >       | 0.3±0.0 = 0.5±0.0 = 0.3±0.0 = 0.3±0.3 = 0.2±0.0 = 0.2±0.0 =   | 0.1±0.0 0.2±0.1  | - =        | - =        | - =        | 0.4±0.0 >  |   |   |   |
| 20:4/20:2  | 0.1±0.1 = 0.1±0.0 = 0.2±0.0 = 0.2±0.0 = 0.2±0.0 > + <             | 0.1±0.0 = 0.1±0.0 = 0.2±0.0 = 0.2±0.0 = 0.2±0.1 > 0.1±0.1 <   | 0.1±0.0 0.1±0.0  | 0.1±0.1 =  | +          | 0.1±0.0 =  | 0.1±0.0 =  |   |   |   |
| 20:4/20:2  | + = + = + = + = + = + =                                           | + = 0.1±0.0 = + = + = + = + = + <                             | 0.1±0.0 +        | + =        | +          | +          | +          |   |   |   |
| 20:2/20:4  | + = + = + = + = + > - <                                           | + = + = + = + = + = + > - =                                   | + +              | + =        | +          | - =        | - =        |   |   |   |
| 20:1/20:5  | + = + = + = + = + < + =                                           | 0.1±0.0 > + = + = + = + = + > - <                             | - +              | + =        | +          | +          | +          |   |   |   |
| 20:4/20:1  | 0.1±0.0 > + > + < + = + = + =                                     | + = + > + = + = + = + = + =                                   | + +              | + =        | 0.1±0.0 =  | +          | 0.7±0.9 =  |   |   |   |
| 20:0/20:5  | 1.5±0.3 < 2.7±0.1 > 1.9±0.3 < 2.6±0.3 = 2.9±0.2 > 0.8±0.3 <       | 1.9±0.3 < 2.8±0.3 = 2.6±0.3 > 2.1±0.3 < 2.9±0.3 > 1.7±0.9 =   | 2.1±0.1 2.1±0.4  | 1.8±0.1 =  | 0.4±0.2 =  | 2.2±0.3 =  | 1.5±0.3 =  |   |   |   |
| 20:0/20:4  | 3.1±0.2 > 1.0±0.1 = 0.8±0.3 < 1.3±0.1 < 1.8±0.1 < 5.7±0.6 >       | 3.4±0.4 > 2.3±0.3 > 1.8±0.2 = 2.0±0.2 < 2.4±0.1 < 6.9±0.6 >   | 3.0±0.1 4.8±0.5  | 2.9±0.4 =  | 5.8±0.6 =  | 3.1±0.3 =  | 7.4±1.3 =  |   |   |   |
| 20:4/22:2  | + > + > - = - = - < + >                                           | - < + = + > - < + = + >                                       | - +              | - =        | +          | +          | - =        |   |   |   |
| 20:5/22:0  | + < 0.1±0.0 = 0.1±0.0 < 0.2±0.0 = 0.1±0.1 > + <                   | + < 0.1±0.0 = 0.1±0.0 = 0.1±0.0 < 0.2±0.0 > 0.1±0.1 =         | 0.1±0.0 0.1±0.1  | 0.1±0.0 =  | +          | 0.1±0.0 =  | +          |   |   |   |
| 22:0/20:5  | + > - = - < + = + > - <                                           | + > - = - < + > + > - <                                       | - 0.1±0.0        | - =        | - =        | - =        | +          |   |   |   |
| 22:0/20:4  | 0.2±0.1 > + > + < 0.1±0.0 = 0.1±0.0 < 0.2±0.1 >                   | 0.1±0.0 > 0.1±0.0 = 0.1±0.0 = 0.1±0.0 = 0.1±0.0 < 0.2±0.1 >   | 0.1±0.0 0.2±0.0  | 0.1±0.0 =  | 0.2±0.1 =  | 0.1±0.0 =  | 0.2±0.1 =  |   |   |   |
| 22:6/22:6  | - = - = - = - = - = - =                                           | - = - < + > - = - = - =                                       | - -              | - =        | +          | - =        | - =        |   |   |   |
| 22:5/22:6  | - = - = - = - = - < + >                                           | - = - = - = - < + > - =                                       | - -              | + =        | - =        | - =        | - =        |   |   |   |
| 22:4/22:4  | - = - = - = - = - < + >                                           | - = - = - = - = - = - =                                       | - -              | - =        | - =        | - =        | - =        |   |   |   |
| 22:5/22:2  | - = - = - = - = - = - =                                           | + > - < + > - = - = - =                                       | + -              | - =        | - =        | +          | - =        |   |   |   |
| 22:5/22:1  | + = + = + = + = + = + =                                           | - < + < + = + = + > - <                                       | - +              | + =        | - =        | +          | +          |   |   |   |
| 24:0/20:5  | 0.1±0.1 = 0.2±0.0 = 0.1±0.0 < 0.2±0.1 = 0.2±0.0 > + <             | 0.1±0.0 = 0.1±0.0 = 0.1±0.0 = 0.1±0.1 = 0.1±0.0 = 0.1±0.0 =   | 0.2±0.1 0.1±0.1  | 0.1±0.0 =  | 0.1±0.0 =  | 0.1±0.0 =  | 0.1±0.0 =  |   |   |   |
| 24:0/20:4  | 0.2±0.0 > 0.1±0.0 = + = 0.1±0.0 = 0.1±0.0 < 0.4±0.0 >             | 0.1±0.0 = 0.1±0.0 = + = 0.1±0.1 = 0.1±0.0 < 0.2±0.1 >         | 0.1±0.1 0.2±0.1  | 0.2±0.0 =  | 0.3±0.1 =  | 0.1±0.0 =  | 0.3±0.1 =  |   |   |   |
| SFA/SFA    | 0.1±0.0 = + < 0.1±0.0 = + = + < 0.2±0.1 >                         | 0.1±0.0 > + = + = + = + < 0.2±0.0 >                           | 0.1±0.0 0.2±0.0  | 0.1±0.0 =  | 0.2±0.0 =  | 0.1±0.0 =  | 0.1±0.0 <  |   |   |   |
| SFA/MUFA   | 0.3±0.1 > 0.1±0.0 = 0.1±0.0 = 0.1±0.0 = 0.1±0.0 < 0.4±0.1 >       | 0.1±0.0 = 0.1±0.0 = 0.1±0.0 < 0.2±0.0 > 0.1±0.0 = 0.3±0.3 =   | 0.4±0.3 0.7±0.4  | 0.2±0.0 =  | 0.3±0.0 =  | 0.3±0.1 =  | 0.3±0.2 =  |   |   |   |
| MUFA/SFA   | - = - = - = - = - = - =                                           | - = - = - = - = - = - =                                       | - -              | - =        | - =        | - =        | - =        |   |   |   |
| SFA/PUFA   | 31.0±0.6 > 24.0±0.9 = 25.9±1.9 = 27.8±1.1 < 31.5±0.5 < 38.6±2.2 > | 27.8±0.8>23.9±1.4=23.9±1.2 < 25.8±0.6 < 28.5±0.7 < 37.6±1.0 > | 26.5±0.235.1±3.2 | 34.7±1.1 = | 37.7±0.2 = | 29.5±0.8 = | 37.7±0.5 = |   |   |   |
| PUFA/SFA   | 1.0±0.2 = 1.1±0.0 = 1.1±0.3 = 1.0±0.2 = 0.9±0.1 > 0.4±0.1 <       | 0.6±0.1 = 0.7±0.1 = 0.7±0.1 = 0.7±0.0 = 0.6±0.1 = 0.8±0.1 =   | 1.0±0.1 1.1±0.3  | 1.2±0.1 =  | 0.4±0.1 =  | 0.7±0.0 =  | 1.0±0.5 =  |   |   |   |
| MUFA/MUFA  | 0.1±0.0 > + = + = 0.1±0.1 = + = 0.1±0.0 =                         | 0.3±0.1 = 0.4±0.4 = 0.2±0.1 < 0.7±0.2 = 0.5±0.2 = 1.1±0.6 =   | 1.0±0.5 2.7±2.3  | 0.1±0.0 =  | 0.1±0.1 =  | 1.4±0.0 >  | 0.6±0.7 =  |   |   |   |
| MUFA/PUFA  | 5.4±0.6 < 7.6±0.8 = 6.6±0.9 = 6.5±1.3 = 6.1±0.3 = 5.0±1.1 =       | 3.4±0.2 < 5.9±0.1 > 4.9±0.2 = 5.1±0.2 > 4.5±0.2 > 2.8±0.4 <   | 3.3±0.6 2.8±0.3  | 5.3±0.3 =  | 4.7±0.2 =  | 3.3±0.5 =  | 3.0±0.1 =  |   |   |   |
| PUFA/ MUFA | 0.1±0.0 = 0.1±0.0 = 0.1±0.0 = 0.1±0.1 = 0.1±0.0 = 0.1±0.0 <       | 0.1±0.0 = + < 0.1±0.0 < 0.6±0.4 > 0.1±0.0 = 0.2±0.1 <         | 0.2±0.1 0.3±0.2  | 0.1±0.0 =  | 0.1±0.0 =  | 0.3±0.3 =  | 0.8±0.9 =  |   |   |   |
| PUFA/PUFA  | 63.8±0.4 < 68.9±1.1 = 68.1±2.7 = 66.8±2.0 > 63.6±0.7 > 57.7±2.6 < | 69.0±1.0<71.8±1.5=72.4±1.2 > 69.6±0.1 > 68.4±0.7 > 58.3±0.4 < | 68.7±0.258.0±4.8 | 60.2±1.0 = | 59.0±0.9 = | 65.7±0.7 < | 58.3±1.4 = |   |   |   |

| PC        | The lower part of the blades of infected <i>U. pinnatifida</i> samples |      |         |      |         |      |         | The upper intact part of the blades of infected <i>U. pinnatifida</i> samples |         |      |         |      |         |   | The upper part of the blades of infected <i>U. pinnatifida</i> samples with endophyte | The lower part of the blades of uninfected <i>U. pinnatifida</i> samples |         |      |         | The upper part of the blades of uninfected <i>U. pinnatifida</i> samples |         |      |         |      |         |         |         |   |          |   |         |   |
|-----------|------------------------------------------------------------------------|------|---------|------|---------|------|---------|-------------------------------------------------------------------------------|---------|------|---------|------|---------|---|---------------------------------------------------------------------------------------|--------------------------------------------------------------------------|---------|------|---------|--------------------------------------------------------------------------|---------|------|---------|------|---------|---------|---------|---|----------|---|---------|---|
|           | Nov.                                                                   | Dec. | Jan.    | Feb. | Apr.    | Jun. | T       | Nov.                                                                          | Dec.    | Jan. | Feb.    | Apr. | Jun.    | T |                                                                                       | Nov.                                                                     | Jun.    | Nov. | S       | Jun.                                                                     | S       | Nov. | S       | Jun. | S       |         |         |   |          |   |         |   |
| 14:1/14:0 | +                                                                      | >    | -       | =    | +       | =    | +       | >                                                                             | -       | <    | +       | =    | -       | = | -                                                                                     | =                                                                        | -       | <    | +       | <                                                                        | +       | >    | +       | -    | -       | =       | -       | = | +        | = | -       | = |
| 14:0/14:0 | 0.1±0.0                                                                | >    | +       | >    | +       | =    | +       | =                                                                             | +       | <    | 0.1±0.1 | >    | +       | > | +                                                                                     | =                                                                        | +       | =    | +       | <                                                                        | +       | =    | 0.1±0.0 | +    | 0.1±0.0 | =       | 0.1±0.1 | = | +        | = | 0.1±0.0 | = |
| 14:0/16:4 | +                                                                      | =    | +       | =    | +       | =    | +       | >                                                                             | -       | =    | -       | <    | +       | = | +                                                                                     | =                                                                        | +       | >    | -       | =                                                                        | -       | <    | +       | -    | +       | =       | +       | = | +        | = | -       | = |
| 16:3/14:0 | +                                                                      | =    | +       | =    | +       | =    | +       | =                                                                             | +       | =    | +       | =    | +       | = | +                                                                                     | =                                                                        | +       | =    | +       | >                                                                        | -       | <    | +       | +    | +       | =       | +       | = | +        | = | -       | = |
| 14:0/16:2 | 0.1±0.0                                                                | =    | +       | <    | 0.1±0.0 | =    | 0.1±0.0 | =                                                                             | 0.1±0.0 | >    | +       | =    | 0.1±0.0 | = | 0.1±0.0                                                                               | =                                                                        | 0.1±0.0 | =    | +       | =                                                                        | 0.1±0.0 | =    | +       | +    | 0.1±0.0 | =       | 0.1±0.0 | = | 0.1±0.0  | = | 0.1±0.1 | = |
| 14:0/16:1 | 0.1±0.0                                                                | >    | 0.1±0.0 | =    | 0.1±0.0 | >    | 0.1±0.0 | =                                                                             | 0.1±0.1 | =    | 0.1±0.1 | =    | 0.1±0.1 | = | 0.1±0.1                                                                               | =                                                                        | 0.1±0.0 | =    | +       | =                                                                        | 0.1±0.0 | =    | 0.1±0.0 | =    | 0.1±0.1 | 0.1±0.1 | 0.2±0.0 | = | 0.1±0.0  | = | 0.1±0.0 | = |
| 14:0/16:1 | +                                                                      | =    | +       | <    | 0.1±0.0 | =    | 0.1±0.0 | =                                                                             | +       | =    | 0.1±0.1 | =    | +       | = | 0.1±0.0                                                                               | =                                                                        | +       | =    | +       | =                                                                        | +       | =    | 0.1±0.0 | =    | 0.1±0.0 | 0.1±0.0 | +       | = | 0.1±0.1  | = | 0.1±0.0 | = |
| 14:0/16:0 | 0.1±0.0                                                                | >    | +       | =    | +       | =    | +       | =                                                                             | +       | <    | 0.3±0.1 | >    | 0.1±0.0 | > | +                                                                                     | =                                                                        | +       | >    | +       | <                                                                        | +       | <    | 0.2±0.1 | >    | 0.1±0.0 | 0.1±0.1 | 0.2±0.0 | = | 0.4±0.1  | = | 0.1±0.0 | = |
| 14:1/18:4 | +                                                                      | =    | +       | =    | +       | =    | +       | >                                                                             | +       | =    | +       | <    | 0.1±0.0 | = | 0.1±0.0                                                                               | >                                                                        | +       | =    | +       | =                                                                        | +       | =    | +       | =    | 0.1±0.0 | 0.1±0.0 | +       | = | +        | = | +       | = |
| 14:0/18:4 | 0.3±0.0                                                                | >    | 0.2±0.0 | =    | 0.2±0.0 | >    | 0.2±0.0 | =                                                                             | 0.2±0.0 | =    | 0.1±0.1 | =    | 0.5±0.1 | = | 0.4±0.1                                                                               | =                                                                        | 0.4±0.0 | >    | 0.2±0.0 | =                                                                        | 0.2±0.0 | <    | 0.5±0.1 | >    | 0.9±0.2 | 0.9±0.3 | 0.5±0.0 | > | 0.3±0.1  | = | 0.7±0.1 | = |
| 14:0/18:3 | 2.9±0.2                                                                | >    | 1.3±0.3 | =    | 1.3±0.1 | >    | 1.0±0.2 | <                                                                             | 1.4±0.1 | =    | 1.6±0.3 | >    | 3.0±0.4 | > | 1.9±0.1                                                                               | >                                                                        | 1.7±0.0 | >    | 0.8±0.0 | <                                                                        | 1.2±0.1 | <    | 1.7±0.0 | >    | 2.1±0.2 | 1.7±0.1 | 3.1±0.1 | = | 1.9±0.0  | = | 2.3±0.3 | = |
| 14:0/18:2 | 2.5±0.2                                                                | >    | 1.6±0.4 | =    | 1.6±0.1 | =    | 1.7±0.1 | <                                                                             | 2.5±0.1 | <    | 3.8±0.8 | >    | 3.4±0.3 | > | 2.4±0.4                                                                               | =                                                                        | 2.0±0.1 | =    | 1.8±0.3 | <                                                                        | 2.5±0.3 | <    | 3.3±0.6 | >    | 1.9±0.2 | 2.2±0.1 | 3.1±0.5 | = | 4.5±0.8  | = | 2.5±0.2 | = |
| 14:0/18:1 | 0.7±0.1                                                                | >    | 0.4±0.1 | =    | 0.3±0.1 | =    | 0.4±0.2 | =                                                                             | 0.4±0.1 | <    | 0.8±0.2 | >    | 0.6±0.1 | > | 0.3±0.1                                                                               | =                                                                        | 0.2±0.1 | <    | 0.3±0.0 | =                                                                        | 0.3±0.1 | =    | 0.4±0.2 | =    | 0.4±0.0 | 0.5±0.1 | 0.8±0.1 | = | 0.7±0.3  | = | 0.6±0.0 | = |
| 16:0/16:1 | 0.2±0.0                                                                | >    | 0.1±0.0 | =    | 0.1±0.0 | >    | +       | <                                                                             | 0.1±0.0 | =    | 0.2±0.1 | >    | 0.2±0.0 | > | 0.1±0.0                                                                               | =                                                                        | 0.1±0.1 | =    | 0.1±0.0 | =                                                                        | 0.1±0.0 | =    | 0.1±0.1 | =    | 0.1±0.0 | 0.1±0.0 | 0.3±0.0 | = | 0.2±0.1  | = | 0.1±0.0 | = |
| 16:0/16:0 | 0.1±0.0                                                                | =    | 0.1±0.1 | =    | +       | >    | +       | <                                                                             | +       | <    | 0.1±0.0 | >    | 0.1±0.0 | > | +                                                                                     | =                                                                        | +       | =    | +       | =                                                                        | +       | <    | 0.1±0.0 | =    | +       | 0.1±0.0 | 0.1±0.0 | = | 0.2±0.2  | = | +       | = |
| 15:1/18:4 | +                                                                      | =    | +       | =    | +       | =    | +       | =                                                                             | +       | =    | +       | =    | +       | = | +                                                                                     | >                                                                        | +       | =    | +       | =                                                                        | +       | =    | +       | +    | +       | =       | +       | = | +        | = | +       | = |
| 17:3/16:1 | 0.1±0.0                                                                | >    | +       | =    | +       | =    | +       | =                                                                             | +       | =    | +       | =    | 0.1±0.0 | = | 0.1±0.0                                                                               | =                                                                        | 0.1±0.0 | =    | +       | =                                                                        | +       | <    | 0.1±0.0 | >    | 0.2±0.1 | 0.2±0.1 | 0.1±0.0 | = | +        | = | 0.1±0.0 | = |
| 15:0/18:3 | 0.1±0.0                                                                | =    | 0.1±0.0 | =    | 0.1±0.0 | =    | 0.1±0.0 | =                                                                             | 0.1±0.0 | =    | 0.1±0.0 | =    | 0.2±0.0 | = | 0.1±0.0                                                                               | =                                                                        | 0.1±0.0 | =    | 0.1±0.1 | =                                                                        | 0.1±0.0 | =    | 0.1±0.1 | =    | 0.1±0.0 | 0.2±0.1 | 0.1±0.0 | = | 0.1±0.0  | = | 0.2±0.1 | = |
| 15:0/18:2 | 0.1±0.0                                                                | >    | 0.1±0.0 | =    | 0.1±0.0 | =    | 0.1±0.1 | =                                                                             | 0.1±0.0 | <    | 0.2±0.1 | >    | 0.3±0.0 | = | 0.2±0.0                                                                               | =                                                                        | 0.2±0.0 | =    | 0.2±0.0 | =                                                                        | 0.2±0.0 | <    | 0.4±0.1 | >    | 0.2±0.0 | 0.3±0.1 | 0.2±0.0 | = | 0.2±0.1  | = | 0.2±0.1 | = |
| 15:0/18:1 | +                                                                      | =    | +       | =    | +       | =    | +       | =                                                                             | +       | =    | +       | =    | +       | = | +                                                                                     | =                                                                        | +       | =    | +       | =                                                                        | +       | =    | 0.1±0.0 | >    | +       | +       | +       | = | 0.1±0.1  | = | +       | = |
| 15:0/18:1 | +                                                                      | =    | +       | >    | +       | <    | +       | =                                                                             | +       | =    | +       | =    | +       | = | +                                                                                     | =                                                                        | +       | <    | +       | >                                                                        | -       | <    | +       | +    | +       | =       | +       | = | +        | = | -       | = |
| 16:3/18:3 | +                                                                      | <    | 0.1±0.0 | =    | 0.1±0.0 | =    | 0.1±0.0 | =                                                                             | +       | >    | +       | <    | 0.1±0.0 | < | 0.1±0.0                                                                               | =                                                                        | 0.1±0.0 | >    | +       | =                                                                        | +       | >    | -       | =    | +       | +       | +       | = | -        | = | +       | = |
| 14:0/20:5 | 4.4±0.5                                                                | <    | 7.1±0.1 | <    | 7.5±0.2 | =    | 6.5±1.1 | =                                                                             | 7.7±1.1 | >    | 1.6±0.4 | <    | 7.0±0.9 | = | 7.9±0.6                                                                               | >                                                                        | 6.4±0.5 | >    | 3.8±0.6 | <                                                                        | 5.7±0.3 | =    | 5.0±2.1 | =    | 7.4±0.3 | 6.9±1.1 | 5.0±0.4 | = | 1.0±0.1  | = | 7.1±0.4 | = |
| 14:0/20:4 | 1.2±0.4                                                                | >    | 0.5±0.1 | =    | 0.4±0.1 | <    | 0.7±0.2 | <                                                                             | 1.0±0.0 | >    | 0.4±0.2 | =    | 2.0±0.1 | > | 0.7±0.1                                                                               | =                                                                        | 0.6±0.1 | =    | 0.6±0.2 | =                                                                        | 0.7±0.3 | <    | 1.1±0.2 | >    | 2.3±0.1 | 1.1±0.1 | 1.5±0.2 | = | 0.2±0.0  | = | 2.6±0.1 | > |
| 14:0/20:4 | 6.9±1.2                                                                | >    | 3.5±0.5 | =    | 3.9±0.2 | =    | 4.2±1.0 | <                                                                             | 5.7±0.5 | <    | 8.1±0.8 | >    | 4.9±0.2 | > | 3.5±0.2                                                                               | >                                                                        | 3.2±0.1 | =    | 3.0±0.2 | =                                                                        | 3.3±0.6 | <    | 7.5±1.0 | >    | 4.3±0.1 | 5.8±0.5 | 7.3±0.3 | = | 7.5±0.2  | = | 4.9±0.3 | = |
| 14:0/20:3 | 1.2±0.2                                                                | >    | 0.7±0.1 | =    | 0.7±0.1 | =    | 0.6±0.0 | <                                                                             | 1.0±0.2 | <    | 1.5±0.3 | >    | 0.8±0.1 | > | 0.6±0.1                                                                               | =                                                                        | 0.6±0.0 | >    | 0.4±0.0 | =                                                                        | 0.4±0.0 | <    | 1.4±0.2 | >    | 0.8±0.1 | 1.2±0.4 | 1.3±0.2 | = | 1.4±0.2  | = | 0.8±0.1 | = |
| 16:0/18:3 | 8.6±0.2                                                                | >    | 4.0±0.9 | =    | 4.3±0.2 | <    | 4.7±0.3 | <                                                                             | 5.4±0.5 | =    | 6.6±1.6 | =    | 6.0±0.5 | = | 5.4±0.3                                                                               | <                                                                        | 6.1±0.5 | =    | 5.6±0.6 | =                                                                        | 5.3±0.2 | >    | 4.1±0.6 | <    | 5.7±0.5 | 4.3±0.1 | 8.1±0.2 | = | 7.4±0.2  | = | 5.6±0.5 | = |
| 18:0/16:3 | 0.3±0.1                                                                | =    | 0.3±0.1 | =    | 0.2±0.1 | =    | 0.2±0.1 | =                                                                             | 0.4±0.2 | =    | 0.3±0.2 | =    | 0.2±0.1 | = | 0.3±0.2                                                                               | =                                                                        | 0.4±0.0 | =    | 0.3±0.1 | =                                                                        | 0.3±0.0 | =    | 0.2±0.1 | =    | 0.2±0.1 | 0.2±0.0 | 0.6±0.3 | = | 0.4±0.2  | = | 0.3±0.1 | = |
| 16:0/18:2 | 4.7±0.3                                                                | =    | 4.3±0.7 | =    | 4.4±0.3 | =    | 4.5±1.1 | =                                                                             | 5.3±0.4 | <    | 9.0±0.8 | >    | 6.8±0.5 | > | 5.4±0.7                                                                               | <                                                                        | 6.5±0.3 | <    | 8.3±1.0 | =                                                                        | 8.8±1.3 | =    | 8.8±2.0 | =    | 5.6±0.8 | 6.4±1.3 | 4.7±0.5 | = | 10.6±1.5 | = | 5.8±0.3 | = |
| 16:0/18:1 | 1.3±0.4                                                                | >    | 0.7±0.2 | >    | 0.3±0.0 | =    | 0.2±0.1 | <                                                                             | 0.5±0.1 | <    | 1.4±0.2 | >    | 1.2±0.2 | > | 0.3±0.1                                                                               | =                                                                        | 0.4±0.1 | =    | 0.3±0.0 | =                                                                        | 0.3±0.1 | <    | 1.1±0.3 | >    | 1.1±0.1 | 1.2±0.3 | 1.2±0.2 | = | 1.7±0.1  | = | 1.2±0.0 | = |
| 16:0/18:0 | +                                                                      | =    | +       | >    | +       | =    | +       | =                                                                             | +       | =    | +       | <    | +       | > | -                                                                                     | <                                                                        | +       | =    | +       | =                                                                        | -       | <    | +       | >    | +       | +       | -       | = | +        | = | +       | = |
| 18:4/17:2 | 0.1±0.0                                                                | <    | 0.1±0.0 | =    | 0.1±0.0 | =    | 0.1±0.0 | =                                                                             | 0.1±0.0 | >    | +       | <    | 0.1±0.0 | = | 0.1±0.0                                                                               | >                                                                        | 0.1±0.0 | >    | +       | <                                                                        | 0.1±0.0 | =    | 0.1±0.1 | =    | 0.1±0.0 | 0.1±0.0 | 0.1±0.0 | = | +        | = | 0.1±0.0 | = |
| 15:0/20:5 | 0.1±0.0                                                                | <    | 0.3±0.0 | =    | 0.3±0.1 | =    | 0.2±0.1 | =                                                                             | 0.2±0.0 | >    | 0.2±0.1 | =    | 0.3±0.0 | = | 0.3±0.0                                                                               | =                                                                        | 0.4±0.0 | >    | 0.2±0.0 | <                                                                        | 0.4±0.0 | <    | 0.5±0.1 | >    | 0.4±0.1 | 0.7±0.2 | 0.2±0.1 | = | 0.1±0.0  | = | 0.5±0.0 | > |
| 15:0/20:4 | -                                                                      | =    | -       | =    | -       | <    | 0.1±0.0 | >                                                                             | +       | >    | -       | <    | -       | = | -                                                                                     | =                                                                        | -       | <    | 0.1±0.0 | =                                                                        | 0.1±0.0 | >    | -       | <    | -       | -       | -       | = | -        | = | -       | = |
| 15:0/20:4 | 0.3±0.0                                                                | >    | 0.2±0.0 | =    | 0.2±0.0 | =    | 0.1±0.1 | =                                                                             | 0.2±0.0 | <    | 0.4±0.2 | >    | 0.4±0.1 | > | 0.2±0.0                                                                               | =                                                                        | 0.3±0.0 | >    | 0.2±0.0 | =                                                                        | 0.2±0.1 | <    | 0.6±0.1 | >    | 0.5±0.1 | 0.7±0.1 | 0.4±0.1 | = | 0.4±0.0  | = | 0.5±0.0 | = |
| 17:1/18:2 | 0.2±0.0                                                                | >    | 0.1±0.0 | =    | 0.1±0.0 | <    | 0.1±0.0 | =                                                                             | 0.2±0.0 | =    | 0.2±0.1 | >    | 0.2±0.0 | > | 0.1±0.0                                                                               | <                                                                        | 0.1±0.0 | =    | 0.2±0.1 | =                                                                        | 0.2±0.0 | =    | 0.2±0.1 | =    | 0.2±0.0 | 0.2±0.1 | 0.2±0.0 | = | 0.2±0.0  | = | 0.2±0.1 | = |



|           |                                                                 |                                                                   |                   |           |            |            |            |
|-----------|-----------------------------------------------------------------|-------------------------------------------------------------------|-------------------|-----------|------------|------------|------------|
| 17:0/18:2 | 0.1±0.0 = 0.1±0.0 > + > + = + < 0.2±0.0 >                       | 0.2±0.0 = 0.1±0.0 > 0.1±0.0 = 0.1±0.0 = 0.1±0.0 = 0.2±0.1 =       | 0.2±0.1 0.1±0.1   | 0.1±0.0 = | 0.2±0.0 =  | 0.2±0.0 =  | 0.2±0.1 =  |
| 16:0/19:1 | 0.1±0.1 > + = + = + = + < + =                                   | 0.1±0.0 > + = + = + > - < + =                                     | 0.4±0.6 +         | + =       | 0.1±0.0 =  | + =        | + =        |
| 18:4/18:4 | 0.1±0.0 < 0.1±0.0 < 0.2±0.0 > + < 0.1±0.0 > + =                 | + < 0.1±0.0 = 0.1±0.0 = 0.1±0.0 = + = 0.1±0.0 =                   | 0.1±0.1 0.1±0.0   | 0.1±0.0 = | + =        | 0.1±0.0 =  | + =        |
| 18:3/18:4 | 0.3±0.1 < 0.4±0.1 < 0.5±0.0 > 0.3±0.1 = 0.3±0.0 > 0.1±0.0 <     | 0.2±0.0 < 0.3±0.1 = 0.3±0.0 > 0.2±0.1 = 0.2±0.0 > 0.2±0.0 =       | 0.3±0.1 0.2±0.1   | 0.3±0.0 = | 0.1±0.0 =  | 0.2±0.0 =  | 0.2±0.0 =  |
| 18:3/18:3 | 1.2±0.1 < 1.9±0.2 = 1.7±0.3 = 1.2±0.2 > 0.9±0.0 > 0.5±0.2 <     | 0.8±0.2 < 1.3±0.2 = 1.2±0.1 > 0.9±0.0 < 1.0±0.0 > 0.4±0.1 <       | 0.8±0.3 0.7±0.2   | 1.2±0.1 = | 0.3±0.0 =  | 0.7±0.1 =  | 0.4±0.1 =  |
| 18:3/18:2 | 0.6±0.3 = 0.8±0.1 > 0.4±0.1 = 0.3±0.1 = 0.2±0.1 = 0.4±0.3 =     | 0.2±0.0 < 0.5±0.2 = 0.4±0.1 > 0.2±0.0 = 0.2±0.1 = 0.2±0.1 =       | 0.2±0.1 0.2±0.1   | 0.5±0.3 = | 0.4±0.2 =  | 0.2±0.0 =  | 0.1±0.1 =  |
| 18:2/18:3 | 0.6±0.1 > 0.3±0.0 > 0.2±0.0 = 0.3±0.1 = 0.3±0.1 = 0.3±0.1 =     | 0.3±0.1 = 0.3±0.1 = 0.2±0.0 > 0.1±0.1 < 0.4±0.1 = 0.2±0.1 =       | 0.3±0.1 0.2±0.1   | 0.6±0.2 = | 0.3±0.0 =  | 0.2±0.0 =  | 0.2±0.0 =  |
| 20:4/16:1 | 0.2±0.2 = 0.2±0.0 = 0.1±0.0 = 0.2±0.1 = 0.2±0.1 = 0.3±0.0 =     | 0.1±0.0 < 0.2±0.0 > 0.1±0.1 < 0.2±0.1 = 0.2±0.1 = 0.2±0.0 =       | 0.1±0.0 0.1±0.0   | 0.3±0.0 = | 0.2±0.1 =  | 0.2±0.0 =  | 0.1±0.0 <  |
| 16:0/20:5 | 7.2±1.3 < 16.4±1.6 < 21.2±1.1 > 18.8±1.0 > 15.3±0.7 > 3.4±1.5 < | 12.1±1.4 < 18.5±0.6 = 20.8±2.0 = 18.9±1.6 = 19.1±1.0 > 10.2±2.6 < | 14.7±2.1 14.5±1.9 | 8.1±0.1 = | 2.1±0.4 =  | 14.0±0.4 = | 8.0±3.4 =  |
| 16:0/20:4 | 2.1±0.4 > 0.8±0.2 < 1.3±0.1 = 1.8±0.7 = 2.0±0.2 > 0.7±0.2 <     | 3.3±0.1 > 1.4±0.1 < 1.8±0.1 = 2.6±0.8 = 2.1±0.7 = 2.3±0.3 =       | 4.4±1.0 3.6±1.7   | 1.9±0.1 = | 1.0±0.4 =  | 4.6±0.1 >  | 1.9±1.4 =  |
| 16:0/20:4 | 9.6±0.9 > 6.7±0.7 = 7.5±0.5 = 9.0±1.4 = 9.0±1.0 < 15.4±1.3 >    | 7.1±0.1 > 5.9±0.4 = 5.9±0.1 < 9.5±1.8 = 7.6±0.7 < 12.2±1.9 =      | 5.7±0.4 9.6±0.5   | 9.2±1.5 = | 14.9±0.2 = | 6.8±0.2 =  | 12.5±0.1 = |
| 16:0/20:3 | 6.0±0.4 > 1.8±0.2 < 2.4±0.2 < 4.1±0.0 < 4.4±0.0 < 6.4±1.2 >     | 3.7±0.3 > 2.1±0.1 < 2.7±0.1 < 4.1±0.6 > 2.6±0.2 < 3.1±0.3 <       | 2.7±0.2 2.7±0.3   | 5.3±0.2 = | 7.1±0.9 =  | 3.2±0.1 =  | 3.2±0.3 =  |
| 18:0/18:2 | 0.6±0.2 = 0.7±0.7 = 0.2±0.1 < 0.3±0.0 = 0.4±0.1 < 1.4±0.3 >     | 1.1±0.2 > 0.4±0.1 = 0.4±0.0 < 0.6±0.0 = 0.8±0.2 < 1.8±0.2 >       | 0.9±0.2 0.9±0.2   | 0.5±0.0 = | 1.6±0.4 =  | 0.9±0.2 =  | 2.1±0.2 =  |
| 18:0/18:1 | 0.1±0.1 = 0.1±0.1 = + = + = + < 0.2±0.0 >                       | 0.1±0.0 = + = + = + = + = 0.1±0.1 =                               | 0.1±0.0 0.1±0.0   | 0.1±0.1 = | 0.2±0.1 =  | 0.1±0.0 =  | 0.1±0.0 =  |
| 18:0/18:0 | + = + > + = + = + < + >                                         | + > + = + < + = + = + =                                           | - +               | + =       | + =        | + =        | - =        |
| 20:5/18:5 | + = 0.1±0.0 = 0.1±0.0 > - = + = + =                             | + = + = + = 0.1±0.0 = 0.1±0.0 > + =                               | 0.1±0.0 +         | + =       | - =        | + =        | + =        |
| 20:5/18:4 | 0.3±0.1 < 0.5±0.0 = 0.5±0.0 > 0.3±0.1 = 0.2±0.0 > 0.1±0.0 <     | 0.3±0.0 < 0.6±0.2 = 0.7±0.1 > 0.4±0.1 = 0.3±0.0 > 0.2±0.0 <       | 0.9±0.2 0.7±0.4   | 0.3±0.0 = | 0.1±0.1 =  | 0.6±0.1 =  | 0.2±0.1 =  |
| 20:5/18:3 | 2.0±0.2 < 5.0±0.4 > 4.0±0.6 > 2.3±0.1 = 2.1±0.2 > 0.8±0.3 <     | 1.7±0.2 < 3.1±0.3 = 3.2±0.2 > 2.0±0.4 = 1.9±0.2 > 1.0±0.0 <       | 2.6±0.5 2.4±0.5   | 2.1±0.1 = | 0.5±0.1 =  | 1.7±0.2 =  | 1.0±0.3 =  |
| 20:4/18:3 | 4.5±0.4 < 6.5±0.6 > 4.5±0.4 = 4.3±0.3 > 3.8±0.1 = 2.9±0.9 <     | 3.3±0.1 < 5.1±0.3 = 4.9±0.3 > 4.0±0.3 = 4.2±0.2 > 2.0±0.5 <       | 3.0±0.4 2.6±0.3   | 4.3±0.1 = | 3.0±1.0 =  | 2.9±0.2 =  | 2.3±0.1 =  |
| 20:5/18:2 | 0.4±0.1 = 0.4±0.1 = 0.5±0.0 = 0.3±0.1 = 0.2±0.1 = 0.3±0.1 =     | 0.2±0.0 = 0.3±0.0 = 0.3±0.0 = 0.3±0.1 = 0.3±0.0 = 0.4±0.4 =       | 0.3±0.1 0.3±0.1   | 0.5±0.0 = | 0.3±0.1 =  | 0.2±0.0 =  | 0.4±0.2 =  |
| 20:4/18:2 | 3.8±0.3 > 2.9±0.3 > 2.1±0.2 < 2.6±0.3 = 2.7±0.2 < 5.2±1.0 >     | 3.3±0.5 = 2.8±0.2 > 1.9±0.3 < 3.0±0.4 = 3.4±0.3 = 3.8±1.0 =       | 2.5±0.2 2.3±0.4   | 3.8±0.4 = | 6.5±0.2 =  | 2.2±0.1 =  | 4.3±1.4 =  |
| 18:1/20:5 | 0.5±0.0 > 0.2±0.0 = 0.2±0.0 = 0.2±0.0 = 0.1±0.1 < 0.6±0.3 >     | 0.3±0.2 = 0.2±0.0 = 0.2±0.1 = 0.4±0.1 > 0.2±0.0 < 0.3±0.0 =       | 0.3±0.1 0.3±0.1   | 0.3±0.1 = | 0.5±0.1 =  | 0.2±0.0 =  | 0.4±0.4 =  |
| 20:3/18:2 | 0.3±0.1 > 0.2±0.1 = 0.1±0.0 = 0.2±0.1 = 0.2±0.0 = 0.3±0.1 =     | 0.2±0.1 = 0.2±0.0 = 0.2±0.0 = 0.2±0.0 = 0.2±0.0 = 0.2±0.1 =       | 0.1±0.0 0.1±0.0   | 0.2±0.0 < | 0.5±0.3 =  | 0.1±0.1 =  | 0.1±0.0 =  |
| 18:2/20:3 | 0.3±0.1 > + = + < 0.1±0.0 = 0.1±0.0 = 0.2±0.2 =                 | 0.2±0.1 = + = + = 0.1±0.1 = 0.1±0.0 = 0.1±0.0 =                   | 0.1±0.1 0.1±0.0   | - =       | 0.2±0.2 =  | + =        | 0.1±0.1 =  |
| 20:4/18:1 | 0.3±0.1 > 0.2±0.1 > 0.1±0.0 = 0.1±0.0 = 0.2±0.1 < 0.5±0.2 >     | 0.2±0.1 = 0.1±0.1 = 0.1±0.0 = 0.1±0.0 = 0.1±0.0 < 0.2±0.1 >       | 0.2±0.1 0.2±0.0   | 0.5±0.0 = | 0.6±0.0 =  | 0.3±0.1 =  | 0.2±0.1 =  |
| 18:0/20:5 | 1.2±0.2 < 1.6±0.1 > 0.9±0.1 = 1.2±0.3 = 1.3±0.0 > 0.8±0.3 =     | 2.0±0.3 > 1.6±0.1 = 1.5±0.2 = 1.2±0.2 = 1.4±0.4 = 1.8±0.5 =       | 1.9±0.3 1.7±0.0   | 1.2±0.1 = | 0.5±0.0 =  | 1.9±0.1 =  | 1.7±0.5 =  |
| 18:0/20:4 | 0.2±0.1 = 0.1±0.0 = + < 0.1±0.0 = 0.1±0.0 > + <                 | 0.4±0.1 > 0.1±0.0 = 0.1±0.0 = 0.1±0.1 = 0.1±0.0 < 0.3±0.0 >       | 0.6±0.0 0.2±0.1   | 0.1±0.1 = | 0.4±0.5 =  | 0.4±0.1 =  | 0.4±0.1 =  |
| 18:0/20:4 | 1.4±0.1 = 0.9±0.8 = 0.3±0.0 < 0.4±0.1 < 0.6±0.1 < 3.1±0.7 >     | 0.9±0.0 > 0.4±0.2 = 0.4±0.0 = 0.6±0.2 = 0.5±0.2 < 1.8±0.2 >       | 0.9±0.2 1.1±0.3   | 1.3±0.1 = | 2.4±0.6 =  | 0.9±0.1 =  | 2.1±0.6 =  |
| 18:0/20:3 | 0.4±0.0 > 0.1±0.0 = + < 0.1±0.0 < 0.1±0.0 = 0.5±0.3 >           | 0.2±0.1 = 0.1±0.1 = 0.2±0.1 = 0.2±0.0 = 0.1±0.1 = 0.2±0.1 =       | 0.1±0.0 0.2±0.1   | 0.2±0.0 < | 0.6±0.1 =  | 0.2±0.2 =  | 0.5±0.2 =  |
| 20:0/18:3 | 0.3±0.1 = 0.1±0.1 = 0.1±0.0 < 0.1±0.0 = 0.1±0.1 < 0.6±0.3 >     | 0.3±0.2 = 0.2±0.1 = 0.2±0.1 = 0.1±0.0 = 0.1±0.0 = 0.3±0.2 =       | 0.3±0.1 0.1±0.1   | 0.3±0.0 = | 0.5±0.2 =  | 0.3±0.2 =  | 0.1±0.1 =  |
| 20:0/18:2 | 0.1±0.0 = 0.1±0.1 = + = + = + < 0.3±0.2 >                       | 0.2±0.0 > 0.1±0.1 = 0.1±0.0 = 0.2±0.0 < 0.2±0.0 < 0.6±0.1 >       | 0.3±0.1 0.3±0.1   | 0.1±0.0 = | 0.4±0.1 =  | 0.3±0.0 =  | 0.6±0.2 =  |
| 16:0/22:1 | + = + = + = + = + = + >                                         | + = + = + < + = + = + =                                           | + +               | + =       | - =        | + =        | + =        |
| 20:0/18:0 | - < + > - < + = + = + =                                         | - < + = + < + > - < + >                                           | - +               | - =       | - =        | - =        | - =        |
| 20:5/20:5 | 1.8±0.5 < 10.1±1.2 = 10.3±0.4 > 6.6±0.4 > 4.8±0.3 > 0.3±0.3 <   | 3.3±0.3 < 8.1±0.2 = 8.5±0.4 > 5.1±0.9 = 5.4±0.6 > 1.2±0.6 <       | 5.7±0.4 3.9±0.5   | 2.1±0.1 = | 0.2±0.1 =  | 4.2±0.5 =  | 1.2±0.7 =  |
| 20:5/20:4 | 0.6±0.2 < 1.0±0.2 = 0.8±0.1 = 0.7±0.3 = 0.9±0.2 > 0.1±0.0 <     | 0.8±0.3 = 0.9±0.1 = 0.9±0.1 > 0.7±0.1 < 0.9±0.1 > 0.5±0.1 =       | 1.7±0.3 1.2±0.1   | 0.4±0.1 = | 0.1±0.1 =  | 1.6±0.6 =  | 0.3±0.3 =  |
| 20:4/20:5 | 5.4±0.7 < 8.4±1.5 = 7.9±0.7 < 9.0±0.0 > 7.8±0.3 > 2.5±0.8 <     | 7.0±0.2 < 8.0±0.6 = 7.4±0.5 < 8.5±0.4 = 8.9±0.8 > 5.3±0.5 <       | 6.4±0.7 5.5±0.9   | 5.7±0.1 = | 1.4±0.2 =  | 6.7±0.4 =  | 4.8±0.1 =  |
| 20:4/20:4 | 1.7±0.4 > 1.1±0.1 = 1.1±0.1 < 1.8±0.5 = 1.7±0.1 > 0.8±0.4 <     | 2.0±0.1 > 1.2±0.1 = 1.2±0.1 < 1.7±0.3 = 1.5±0.3 = 1.2±0.2 <       | 1.7±0.3 1.5±0.3   | 1.9±0.2 = | 0.5±0.2 =  | 2.0±0.1 =  | 1.3±0.1 =  |
| 20:4/20:4 | 5.4±1.0 > 2.6±0.5 = 2.5±0.2 < 3.9±0.4 = 3.9±0.3 < 8.7±1.2 >     | 2.9±0.4 > 2.2±0.3 = 1.8±0.4 < 3.7±0.9 = 2.8±0.3 < 6.3±1.6 >       | 1.9±0.3 3.9±1.0   | 4.5±0.6 = | 7.6±0.8 =  | 2.0±0.2 =  | 6.3±2.6 =  |
| 20:4/20:3 | 2.4±0.4 > 0.7±0.2 = 0.7±0.0 < 1.6±0.3 = 1.7±0.1 < 3.0±0.6 >     | 1.1±0.2 > 0.8±0.1 = 0.8±0.2 < 1.4±0.2 > 0.9±0.1 < 1.3±0.2 =       | 0.9±0.1 1.1±0.4   | 2.0±0.3 = | 3.2±0.4 =  | 1.0±0.0 =  | 1.3±0.6 =  |
| 20:4/20:2 | 0.2±0.1 > 0.1±0.0 = 0.1±0.0 = 0.1±0.1 = 0.1±0.0 < 0.3±0.0 =     | 0.1±0.1 < 0.2±0.0 = 0.2±0.1 = 0.2±0.0 = 0.2±0.1 = 0.2±0.0 =       | 0.1±0.0 0.1±0.1   | 0.2±0.0 = | 0.2±0.1 =  | 0.1±0.0 =  | 0.2±0.0 =  |
| 20:4/20:2 | 0.1±0.0 = 0.1±0.0 = 0.1±0.0 = 0.1±0.1 = 0.1±0.0 < 0.3±0.1 >     | 0.1±0.1 = 0.1±0.1 = 0.1±0.1 = 0.1±0.0 = 0.2±0.1 < 0.4±0.1 >       | 0.1±0.0 0.2±0.1   | 0.1±0.0 = | 0.2±0.2 =  | 0.1±0.0 =  | 0.3±0.1 =  |
| 20:0/20:5 | 0.5±0.1 < 0.9±0.1 > 0.7±0.1 < 0.9±0.2 = 0.7±0.1 > 0.3±0.1 <     | 0.8±0.1 < 1.4±0.3 = 1.1±0.1 = 1.0±0.1 = 1.3±0.2 > 0.8±0.2 =       | 0.9±0.1 0.8±0.1   | 0.6±0.1 = | 0.2±0.0 =  | 1.1±0.2 =  | 0.8±0.4 =  |
| 20:0/20:4 | 0.4±0.1 > 0.1±0.0 = 0.1±0.0 < 0.3±0.0 = 0.3±0.0 < 1.0±0.2 >     | 0.4±0.1 = 0.3±0.1 = 0.2±0.0 < 0.4±0.1 = 0.3±0.0 < 0.9±0.3 >       | 0.5±0.1 0.6±0.2   | 0.4±0.1 = | 1.0±0.1 =  | 0.5±0.1 =  | 0.8±0.1 =  |

|            |                                                                   |                                                                   |                  |            |            |            |            |
|------------|-------------------------------------------------------------------|-------------------------------------------------------------------|------------------|------------|------------|------------|------------|
| 22:1/18:2  | + = + = + = + = + < + =                                           | + = + = + = + = + < + >                                           | 0.1±0.1 +        | + =        | 0.1±0.1 =  | + =        | + =        |
| 20:5/22:2  | - = - = - = - < + > - =                                           | + > - = - < + = + < + >                                           | - +              | + =        | - =        | - =        | - =        |
| 20:4/22:2  | - = + = + = + > - = - <                                           | + < + > + = + = + > - <                                           | - -              | - =        | - =        | - =        | - =        |
| SFA/SFA    | 0.3±0.0 > 0.1±0.1 = 0.1±0.0 = 0.1±0.0 = 0.1±0.0 < 0.6±0.1 >       | 0.2±0.0 > 0.1±0.0 = + = + = 0.1±0.0 < 0.3±0.1 >                   | 0.2±0.0 0.2±0.1  | 0.3±0.0 =  | 0.7±0.4 =  | 0.2±0.0 =  | 0.4±0.0 =  |
| SFA/MUFA   | 2.5±0.6 > 1.3±0.2 > 0.7±0.1 = 0.8±0.3 = 1.0±0.1 < 2.7±0.3 >       | 2.2±0.4 > 0.9±0.1 = 0.7±0.2 = 0.7±0.1 = 0.8±0.1 < 1.8±0.4 >       | 2.2±0.6 2.0±0.2  | 2.5±0.4 =  | 2.9±0.1 =  | 2.1±0.0 =  | 2.2±0.1 =  |
| MUFA/SFA   | - = - = - = - = - = - =                                           | - = - = - = - = - = - =                                           | - -              | - =        | - =        | - =        | - =        |
| SFA/PUFA   | 63.7±1.1 > 54.5±2.7 < 60.1±0.6 < 62.4±1.1 < 65.7±1.2 < 67.7±0.8 > | 68.4±0.8 > 62.1±1.4 = 64.2±1.7 = 65.2±0.7 = 65.6±1.0 < 71.7±1.1 > | 66.4±1.869.0±2.9 | 65.3±0.1 = | 69.0±3.1 = | 69.5±1.1 = | 71.3±3.5 = |
| PUFA/SFA   | + = + = + > + = + > + =                                           | + = + = + > + = + > + =                                           | + +              | + =        | + =        | + =        | + =        |
| MUFA/MUFA  | - = - = - = - = - = - =                                           | - = - = - = - = - = - =                                           | - -              | - =        | - =        | - =        | - =        |
| MUFA/PUFA  | 0.8±0.0 > 0.3±0.1 = 0.3±0.1 = 0.3±0.1 = 0.3±0.2 < 0.8±0.2 >       | 0.6±0.2 = 0.4±0.0 = 0.5±0.1 = 0.5±0.1 > 0.3±0.1 < 0.5±0.1 =       | 0.6±0.0 0.7±0.0  | 0.6±0.1 =  | 0.9±0.2 =  | 0.5±0.0 =  | 0.7±0.3 =  |
| PUFA/ MUFA | 0.6±0.1 > 0.4±0.0 > 0.3±0.0 = 0.4±0.1 = 0.4±0.0 < 0.8±0.2 >       | 0.3±0.1 = 0.4±0.1 > 0.2±0.0 < 0.3±0.1 = 0.3±0.0 < 0.5±0.1 >       | 0.5±0.1 0.5±0.1  | 0.7±0.2 =  | 0.8±0.1 =  | 0.5±0.1 =  | 0.4±0.0 =  |
| PUFA/PUFA  | 31.9±1.0 < 43.2±2.8 > 38.4±0.5 > 36.0±1.3 > 32.3±1.1 > 27.1±1.2 < | 28.1±0.6 < 36.0±1.2 = 34.3±1.6 = 33.0±0.8 = 32.9±1.0 > 25.0±1.3 < | 30.0±1.227.6±3.3 | 30.3±0.5 = | 25.5±3.2 = | 27.1±1.2 = | 24.9±3.2 = |

| PI        | The lower part of the blades of infected <i>U. pinnatifida</i> samples |            |            |            |             |            |           | The upper intact part of the blades of infected <i>U. pinnatifida</i> samples |             |            |            |            |            |           | The upper part of the blades of infected <i>U. pinnatifida</i> samples with endophyte |           | The lower part of the blades of uninfected <i>U. pinnatifida</i> samples |            | The upper part of the blades of uninfected <i>U. pinnatifida</i> samples |            |           |           |           |           |
|-----------|------------------------------------------------------------------------|------------|------------|------------|-------------|------------|-----------|-------------------------------------------------------------------------------|-------------|------------|------------|------------|------------|-----------|---------------------------------------------------------------------------------------|-----------|--------------------------------------------------------------------------|------------|--------------------------------------------------------------------------|------------|-----------|-----------|-----------|-----------|
|           | Nov.                                                                   | Dec.       | Jan.       | Feb.       | Apr.        | Jun.       | T         | Nov.                                                                          | Dec.        | Jan.       | Feb.       | Apr.       | Jun.       | T         | Nov.                                                                                  | Jun.      | Nov.                                                                     | S          | Jun.                                                                     | S          | Nov.      | S         | Jun.      | S         |
| 14:0/18:4 | 0.1±0.2 =                                                              | +          | =          | +          | =           | +          | =         | 0.1±0.2 =                                                                     | +           | =          | +          | =          | +          | =         | +                                                                                     | =         | +                                                                        | +          | +                                                                        | =          | +         | =         | +         | =         |
| 18:3/14:0 | 0.3±0.4 =                                                              | 0.6±0.7 =  | 0.6±0.8 =  | +          | =           | +          | =         | +                                                                             | =           | +          | =          | 0.2±0.4 =  | 0.3±0.3 =  | +         | =                                                                                     | 0.2±0.3 = | 1.6±2.7                                                                  | +          | 0.6±0.8 =                                                                | +          | =         | 0.4±0.6 = | 0.6±0.8 = |           |
| 14:0/18:2 | 0.8±0.5 =                                                              | 3.7±4.0 =  | 1.3±1.3 =  | 0.1±0.2 =  | 0.3±0.5 =   | 1.7±1.9 =  |           | 2.2±1.3 =                                                                     | 0.4±0.8 =   | 0.3±0.3 =  | 0.2±0.2 =  | 0.2±0.3 =  | 1.7±2.2 =  |           | 0.1±0.2                                                                               | 1.0±1.0   | +                                                                        | 1.6±2.3 =  | 1.1±0.3 =                                                                | 0.1±0.1 =  |           |           |           |           |
| 14:0/18:1 | 4.0±1.9 =                                                              | 2.9±0.7 =  | 1.9±1.4 =  | 1.3±0.9 =  | 3.1±1.5 =   | 4.2±2.8 =  |           | 3.6±3.5 =                                                                     | 0.2±0.3 <   | 3.9±1.0 =  | 3.3±3.3 =  | 3.7±2.0 =  | 2.0±3.2 =  |           | 4.4±0.4                                                                               | 5.3±3.2   | 3.4±0.3 =                                                                | 4.5±0.4 =  | 2.3±0.5 =                                                                | 0.4±0.3 =  |           |           |           |           |
| 16:0/16:0 | 1.5±1.3 =                                                              | 0.4±0.6 =  | 0.3±0.3 =  | 0.3±0.2 =  | 0.1±0.2 =   | 0.8±0.8 =  |           | 0.3±0.5 =                                                                     | 0.4±0.6 =   | +          | =          | 1.3±1.8 =  | 0.3±0.6 =  | 0.2±0.3 = |                                                                                       | 0.6±0.5   | 0.7±1.2                                                                  | 0.4±0.6 =  | +                                                                        | =          | 1.9±1.8 = | 0.6±0.8 = |           |           |
| 14:0/20:5 | +                                                                      | =          | +          | =          | +           | =          | +         | +                                                                             | =           | +          | =          | 0.3±0.5 =  | +          | =         | 0.1±0.2 =                                                                             | +         | 0.1±0.2                                                                  | +          | =                                                                        | +          | =         | +         | =         | 0.5±0.7 = |
| 16:0/18:4 | 0.2±0.4 =                                                              | 0.2±0.4 =  | 0.5±0.4 =  | 0.3±0.3 >  | +           | =          | 0.2±0.4 = | 1.5±1.3 >                                                                     | +           | =          | 0.2±0.3 =  | 0.3±0.3 =  | +          | =         | 0.4±0.4 =                                                                             | 0.3±0.2   | 0.3±0.5                                                                  | 1.6±2.3 =  | 2.0±2.8 =                                                                | +          | =         | 0.2±0.3 = |           |           |
| 16:0/18:3 | 2.9±2.8 =                                                              | 4.9±2.3 =  | 6.1±1.6 >  | 2.0±1.0 =  | 2.4±1.5 =   | 2.9±3.5 =  |           | 5.6±3.7 =                                                                     | 1.3±1.2 <   | 5.7±1.3 =  | 3.8±1.2 =  | 6.3±2.8 =  | 10.0±2.6 > |           | 9.5±5.5                                                                               | 8.4±4.3   | 6.0±0.4 =                                                                | 7.1±10.1 = | 5.7±1.5 =                                                                | 13.6±6.6 = |           |           |           |           |
| 16:0/18:2 | 8.2±2.9 <                                                              | 14.0±1.8 = | 14.4±1.3 < | 20.8±5.4 = | 16.2±3.0 =  | 14.4±2.7 = |           | 9.0±2.4 =                                                                     | 18.9±18.4 = | 15.4±4.9 = | 23.0±4.9 = | 26.7±2.7 = | 28.0±4.5 = |           | 10.7±3.8                                                                              | 17.8±4.5  | 7.1±2.7 =                                                                | 12.5±8.4 = | 9.1±3.0 =                                                                | 25.8±0.3 = |           |           |           |           |
| 16:0/18:1 | 66.7±3.1 >                                                             | 60.4±2.2 = | 63.8±3.2 = | 65.0±4.5 = | 64.7±10.1 = | 63.5±8.3 = |           | 61.6±6.7 =                                                                    | 73.1±13.4 = | 60.6±0.8 = | 54.2±5.6 = | 48.8±3.6 > | 42.6±3.8 < |           | 59.4±3.1                                                                              | 147.1±6.2 | 67.3±3.1 =                                                               | 55.1±5.9 = | 67.2±9.6 =                                                               | 40.2±1.0 = |           |           |           |           |
| 16:0/18:0 | 8.4±1.5 =                                                              | 9.3±3.0 =  | 9.3±1.4 =  | 7.6±1.1 =  | 8.1±2.2 =   | 9.1±3.7 =  |           | 8.7±0.3 =                                                                     | 13.0±5.8 =  | 7.9±2.2 =  | 7.5±3.0 =  | 7.1±2.6 =  | 7.1±5.0 =  |           | 8.7±2.3                                                                               | 10.7±5.6  | 8.2±0.8 =                                                                | 3.7±2.0 =  | 7.6±4.2 =                                                                | 5.5±1.1 =  |           |           |           |           |
| 17:0/18:4 | 0.6±1.0 =                                                              | 0.5±0.9 =  | 0.3±0.4 =  | 0.3±0.3 =  | 0.4±0.3 =   | 0.3±0.4 =  |           | +                                                                             | =           | +          | =          | 0.1±0.2 =  | 0.4±0.7 =  | +         | =                                                                                     | 0.5±0.9 = | +                                                                        | 1.0±1.7    | +                                                                        | =          | +         | =         | +         | =         |
| 17:0/18:3 | 0.2±0.4 =                                                              | 0.4±0.6 =  | +          | =          | 0.6±0.7 =   | +          | =         | 0.1±0.2 =                                                                     |             | +          | =          | +          | =          | 0.6±1.0 = | 0.1±0.2 =                                                                             | 0.7±0.8 = | +                                                                        | +          | +                                                                        | =          | 0.3±0.4 = | 0.3±0.5 = |           |           |
| 17:0/18:2 | 0.2±0.4 =                                                              | +          | =          | 0.2±0.3 =  | 0.6±0.3 =   | 0.2±0.3 =  | 0.1±0.2 < | 0.2±0.4 =                                                                     | 0.1±0.1 =   | 0.1±0.2 =  | 0.1±0.2 =  | +          | =          | 1.1±1.3 = | +                                                                                     | 0.3±0.5   | +                                                                        | =          | +                                                                        | =          | +         | =         | 0.2±0.3 = |           |
| 18:1/17:0 | 0.6±0.4 =                                                              | 0.8±1.1 =  | 1.4±1.7 =  | 1.3±0.6 >  | 0.3±0.5 =   | 0.4±0.4 <  |           | +                                                                             | =           | 0.2±0.3 <  | 0.8±0.2 =  | 1.6±2.7 =  | 0.9±0.9 =  | 0.4±0.7 = |                                                                                       | 1.3±0.5   | 1.0±1.2                                                                  | 0.7±1.0 =  | 2.0±2.8 =                                                                | 0.7±1.0 =  | 0.3±0.4 = |           |           |           |
| 16:0/20:5 | 0.8±0.7 =                                                              | 0.6±0.8 =  | 1.2±0.4 =  | 1.0±1.2 =  | 0.8±0.9 =   | 0.4±0.4 =  |           | 0.1±0.3 =                                                                     | 0.3±0.5 =   | 1.5±1.9 =  | +          | <          | 1.2±0.5 =  | 0.6±0.8 = |                                                                                       | 0.6±0.8   | 0.6±1.1                                                                  | 0.8±1.1 =  | +                                                                        | =          | 0.8±0.2 > | 1.3±1.8 = |           |           |
| 16:0/20:4 | 0.2±0.2 <                                                              | 1.8±1.0 =  | 0.4±0.4 =  | 0.5±0.6 =  | 1.7±0.7 =   | 0.6±0.5 =  |           | 0.4±0.4 =                                                                     | 0.3±0.5 <   | 1.9±1.0 =  | 1.4±0.4 =  | 1.9±0.6 =  | 0.9±0.9 =  |           | 0.5±0.4                                                                               | 4.5±1.8   | 0.8±1.1 =                                                                | 7.1±2.5 =  | +                                                                        | =          | 1.1±1.5 = |           |           |           |
| 20:3/16:0 | 0.1±0.2 =                                                              | 1.1±1.0 =  | 0.9±0.9 =  | 0.6±0.4 =  | 1.2±1.3 =   | 1.6±0.7 >  |           | 1.2±0.4 >                                                                     | 0.1±0.1 <   | 1.7±1.0 =  | 1.3±1.0 =  | 1.0±0.9 >  | +          | <         | 0.7±0.3                                                                               | 1.1±1.5   | 0.2±0.3 =                                                                | +          | =                                                                        | +          | <         | 1.7±2.4 = |           |           |
| 18:1/18:1 | 2.3±1.0 =                                                              | 1.0±0.9 =  | 0.7±0.5 =  | 0.7±0.7 <  | 2.5±0.7 =   | 1.9±1.6 =  |           | 0.6±1.0 =                                                                     | 0.3±0.5 =   | 0.5±0.5 =  | 1.0±0.6 =  | 0.8±1.4 =  | 0.2±0.4 =  |           | 1.0±1.4                                                                               | 0.3±0.5   | 0.6±0.3 =                                                                | 0.6±0.9 =  | 0.1±0.2 =                                                                | 0.1±0.2 =  |           |           |           |           |
| 18:0/18:1 | 1.9±2.3 =                                                              | 1.4±1.5 =  | 2.2±0.8 =  | 1.4±0.4 =  | 2.9±1.5 =   | 3.5±0.7 >  |           | 3.7±2.3 =                                                                     | 1.2±2.0 =   | 1.3±0.5 =  | 1.4±0.3 =  | 1.3±1.5 =  | 0.3±0.3 <  |           | 0.7±1.1                                                                               | 0.1±0.2   | 2.0±0.6 =                                                                | 1.3±1.8 =  | 2.8±2.1 =                                                                | 1.2±1.7 =  |           |           |           |           |
| 18:0/18:0 | +                                                                      | =          | +          | =          | +           | =          | 1.1±1.2 = | 0.8±0.3 =                                                                     | 0.8±1.0 =   |            | 1.2±2.0 =  | 1.8±1.9 =  | 0.1±0.1 =  | 1.2±1.3 = | 0.6±0.5 =                                                                             | 0.7±1.3 = | +                                                                        | 1.9±1.0    | 0.1±0.2 =                                                                | 0.6±0.9 =  | +         | =         | 0.5±0.1 = |           |
| SFA/SFA   | 9.8±0.6 =                                                              | 9.6±2.5 =  | 9.7±1.5 =  | 8.9±1.8 =  | 8.7±2.1 =   | 10.7±3.5 = |           | 10.1±2.5 =                                                                    | 15.2±4.1 >  | 8.0±2.1 =  | 9.7±5.8 =  | 8.1±3.2 =  | 8.0±5.0 =  |           | 9.2±2.8                                                                               | 13.3±4.3  | 8.8±0.0 =                                                                | 4.3±2.9 =  | 9.5±2.5 =                                                                | 6.6±0.4 =  |           |           |           |           |
| SFA/MUFA  | 72.6±1.2 >                                                             | 64.7±0.5 = | 67.9±3.3 = | 67.6±5.0 = | 70.7±8.9 =  | 71.2±9.4 = |           | 69.0±9.1 =                                                                    | 74.4±13.4 = | 65.8±1.4 > | 59.0±3.1 = | 53.8±4.1 = | 44.9±6.8 < |           | 64.4±2.9                                                                              | 52.4±3.1  | 72.7±3.4 =                                                               | 60.8±8.0 = | 72.3±8.1 =                                                               | 41.8±2.3 = |           |           |           |           |

|            |                                                                   |          |   |                                                         |          |          |          |   |          |   |          |   |          |   |
|------------|-------------------------------------------------------------------|----------|---|---------------------------------------------------------|----------|----------|----------|---|----------|---|----------|---|----------|---|
| MUFA/SFA   | 0.6±0.4 = 0.8±1.1 = 1.4±1.7 = 1.3±0.6 = 0.3±0.5 = 0.4±0.4 =       | +        | = | 0.2±0.3 = 0.8±0.2 = 1.6±2.7 = 0.9±0.9 = 0.4±0.7 =       | 1.3±0.5  | 1.0±1.2  | 0.7±1.0  | = | 2.0±2.8  | = | 0.7±1.0  | = | 0.3±0.4  | = |
| SFA/PUFA   | 14.2±1.6 < 26.2±2.4 = 23.9±2.0 = 26.2±4.6 = 22.2±6.1 = 20.1±5.9 = | 19.2±6.3 | = | 21.3±16.7 = 25.1±1.0 = 30.1±5.2 = 36.3±2.1 = 43.9±7.5 > | 21.7±3.9 | 34.0±0.8 | 20.1±0.0 | = | 30.4±4.7 | = | 16.9±5.1 | = | 43.1±1.6 | = |
| PUFA/SFA   | 0.4±0.7 < 1.7±0.4 = 1.4±1.7 = 0.6±0.4 = 1.2±1.3 = 1.6±0.7 >       | 1.2±0.4  | > | 0.1±0.1 < 1.9±1.3 = 1.6±0.8 = 1.0±0.9 = 0.2±0.3 <       | 2.3±2.4  | 1.1±1.5  | 0.8±1.1  | = | +        | = | 0.4±0.6  | = | 2.3±3.2  | = |
| MUFA/MUFA  | 2.3±1.0 = 1.0±0.9 = 0.7±0.5 = 0.7±0.7 < 2.5±0.7 = 1.9±1.6 =       | 0.6±1.0  | = | 0.3±0.5 = 0.5±0.5 = 1.0±0.6 = 0.8±1.4 = 0.2±0.4 =       | 1.0±1.4  | 0.3±0.5  | 0.6±0.3  | = | 0.6±0.9  | = | 0.1±0.2  | = | 0.1±0.2  | = |
| MUFA/PUFA  | - = - = - = - = - = - = - =                                       | -        | = | - = - = - = - = - = - =                                 | -        | -        | -        | < | -        | < | -        | < | -        | < |
| PUFA/ MUFA | - = - = - = - = - = - = - =                                       | -        | = | - = - = - = - = - = - =                                 | -        | -        | -        | < | -        | < | -        | < | -        | < |
| PUFA/PUFA  | - = - = - = - = - = - = - =                                       | -        | = | - = - = - = - = - = - =                                 | -        | -        | -        | < | -        | < | -        | < | -        | < |

| PHEG      | The lower part of the blades of infected <i>U. pinnatifida</i> samples |      |          |      |          |      |          | The upper intact part of the blades of infected <i>U. pinnatifida</i> samples |          |      |          |      |          |   | The upper part of the blades of infected <i>U. pinnatifida</i> samples with endophyte | The lower part of the blades of uninfected <i>U. pinnatifida</i> samples |          | The upper part of the blades of uninfected <i>U. pinnatifida</i> samples |          |   |          |         |          |   |          |          |          |   |          |   |          |   |          |   |
|-----------|------------------------------------------------------------------------|------|----------|------|----------|------|----------|-------------------------------------------------------------------------------|----------|------|----------|------|----------|---|---------------------------------------------------------------------------------------|--------------------------------------------------------------------------|----------|--------------------------------------------------------------------------|----------|---|----------|---------|----------|---|----------|----------|----------|---|----------|---|----------|---|----------|---|
|           | Nov.                                                                   | Dec. | Jan.     | Feb. | Apr.     | Jun. | T        | Nov.                                                                          | Dec.     | Jan. | Feb.     | Apr. | Jun.     | T | Nov.                                                                                  | Jun.                                                                     | Nov.     | S                                                                        | Jun.     | S | Nov.     | S       | Jun.     | S |          |          |          |   |          |   |          |   |          |   |
| 20:5/20:5 | 0.4±0.1                                                                | <    | 2.6±0.9  | =    | 2.0±0.4  | >    | +        | <                                                                             | 0.4±0.3  | <    | 2.0±0.7  | =    | 1.9±0.2  | > | 1.0±0.4                                                                               | >                                                                        | 0.5±0.2  | =                                                                        | 0.2±0.1  | < | 1.6±0.3  | 2.8±1.0 | 0.8±0.0  | > | 0.2±0.2  | =        | 0.7±0.1  | = | 0.3±0.1  | = |          |   |          |   |
| 20:5/20:4 | 18.3±1.1                                                               | <    | 33.4±1.4 | =    | 33.0±3.8 | >    | 22.8±2.4 | =                                                                             | 20.9±0.6 | >    | 5.6±3.5  | <    | 16.2±1.1 | < | 25.0±0.8                                                                              | =                                                                        | 24.7±1.7 | >                                                                        | 14.3±1.5 | < | 19.4±1.3 | >       | 7.9±3.2  | < | 23.0±3.1 | 18.6±0.2 | 19.5±0.8 | = | 2.9±0.8  | = | 18.6±3.2 | = | 7.8±2.3  | = |
| 20:4/20:4 | 80.8±0.9                                                               | >    | 63.4±2.2 | =    | 64.4±4.3 | <    | 74.9±2.2 | <                                                                             | 77.6±0.8 | <    | 93.9±3.5 | >    | 83.0±1.0 | > | 72.3±1.5                                                                              | =                                                                        | 73.0±1.9 | <                                                                        | 83.9±1.7 | > | 79.6±1.5 | <       | 91.3±2.8 | > | 75.0±2.9 | 78.4±1.1 | 79.2±0.9 | = | 96.0±1.3 | = | 80.4±3.3 | = | 91.5±2.4 | = |
| 20:4/20:3 | 0.5±0.2                                                                | =    | 0.6±0.2  | =    | 0.6±0.1  | =    | 0.9±0.3  | =                                                                             | 0.7±0.1  | =    | 0.5±0.2  | <    | 0.4±0.1  | < | 0.7±0.0                                                                               | >                                                                        | 0.4±0.1  | <                                                                        | 0.8±0.0  | > | 0.5±0.2  | =       | 0.9±0.4  | = | 0.3±0.0  | 0.2±0.1  | 0.5±0.1  | = | 0.9±0.3  | = | 0.3±0.1  | = | 0.4±0.1  | = |
| 20:4/20:2 | -                                                                      | =    | -        | =    | +        | >    | -        | <                                                                             | +        | >    | -        | =    | +        | > | -                                                                                     | <                                                                        | +        | =                                                                        | 0.1±0.0  | > | -        | -       | +        | = | -        | =        | +        | = | -        | = | 0.1±0.0  | = | -        | = |

| TAG            | The lower part of the blades of infected <i>U. pinnatifida</i> samples |      |         |      |         |      |         | The upper intact part of the blades of infected <i>U. pinnatifida</i> samples |         |      |         |      |         |   | The upper part of the blades of infected <i>U. pinnatifida</i> samples with endophyte |      | The upper part of the blades of uninfected <i>U. pinnatifida</i> samples |      |         | The lower part of the blades of infected <i>U. pinnatifida</i> samples |         |      |         |   |         |         |         |   |         |   |         |   |         |   |
|----------------|------------------------------------------------------------------------|------|---------|------|---------|------|---------|-------------------------------------------------------------------------------|---------|------|---------|------|---------|---|---------------------------------------------------------------------------------------|------|--------------------------------------------------------------------------|------|---------|------------------------------------------------------------------------|---------|------|---------|---|---------|---------|---------|---|---------|---|---------|---|---------|---|
|                | Nov.                                                                   | Dec. | Jan.    | Feb. | Apr.    | Jun. | T       | Nov.                                                                          | Dec.    | Jan. | Feb.    | Apr. | Jun.    | T | Nov.                                                                                  | Jun. | Nov.                                                                     | Jun. | S       | Nov.                                                                   | S       | Jun. | S       |   |         |         |         |   |         |   |         |   |         |   |
| 46:2           | 0.2±0.0                                                                | =    | 0.2±0.1 | =    | 0.1±0.1 | =    | +       | =                                                                             | +       | <    | 0.1±0.1 | =    | 0.3±0.4 | = | 0.3±0.1                                                                               | >    | 0.1±0.0                                                                  | >    | +       | >                                                                      | +       | <    | 0.2±0.1 | > | 0.2±0.0 | 0.1±0.1 | 0.2±0.0 | = | +       | = | 0.4±0.1 | = | 0.1±0.1 | = |
| 47:1           | 1.3±0.9                                                                | =    | 0.9±0.2 | >    | 0.3±0.1 | >    | 0.1±0.0 | =                                                                             | 0.1±0.0 | <    | 0.9±0.5 | >    | 0.9±0.2 | = | 1.2±0.3                                                                               | >    | 0.3±0.0                                                                  | >    | 0.1±0.0 | =                                                                      | 0.1±0.0 | <    | 0.8±0.3 | > | 0.7±0.1 | 0.8±0.4 | 1.2±0.0 | = | 0.5±0.1 | = | 0.5±0.0 | = | 0.4±0.0 | = |
| 47:2           | 0.8±0.5                                                                | =    | 0.5±0.0 | >    | 0.1±0.1 | >    | +       | <                                                                             | 0.1±0.0 | <    | 0.5±0.1 | >    | 0.6±0.3 | = | 0.6±0.2                                                                               | >    | 0.1±0.0                                                                  | >    | +       | <                                                                      | 0.1±0.0 | <    | 0.5±0.2 | > | 0.5±0.2 | 0.4±0.1 | 0.8±0.0 | = | 0.3±0.1 | = | 0.3±0.0 | = | 0.2±0.1 | = |
| 49:2           | 1.8±1.0                                                                | =    | 1.2±0.1 | >    | 0.5±0.0 | >    | 0.2±0.0 | =                                                                             | 0.2±0.0 | <    | 1.1±0.1 | >    | 1.2±0.3 | < | 1.6±0.2                                                                               | >    | 0.5±0.1                                                                  | >    | 0.1±0.0 | =                                                                      | 0.1±0.0 | <    | 1.3±0.4 | > | 1.0±0.5 | 1.0±0.4 | 1.5±0.3 | = | 1.1±0.1 | = | 0.6±0.0 | < | 0.9±0.0 | = |
| 49:3           | 0.2±0.1                                                                | =    | 0.2±0.0 | >    | 0.1±0.0 | >    | +       | =                                                                             | +       | <    | 0.2±0.1 | >    | 0.1±0.0 | = | 0.1±0.1                                                                               | >    | 0.1±0.0                                                                  | >    | +       | =                                                                      | +       | <    | 0.2±0.1 | > | 0.1±0.1 | 0.2±0.1 | 0.2±0.0 | = | 0.2±0.2 | = | 0.1±0.0 | < | 0.2±0.1 | = |
| 49:3           | 0.4±0.2                                                                | =    | 0.3±0.0 | >    | 0.1±0.0 | >    | +       | =                                                                             | +       | <    | 0.4±0.2 | >    | 0.3±0.1 | = | 0.4±0.1                                                                               | >    | 0.1±0.0                                                                  | >    | +       | =                                                                      | +       | <    | 0.4±0.1 | > | 0.2±0.1 | 0.2±0.1 | 0.3±0.1 | = | 0.3±0.1 | = | 0.2±0.0 | = | 0.3±0.1 | = |
| 49:4           | 0.2±0.1                                                                | =    | 0.1±0.1 | =    | 0.1±0.0 | >    | +       | =                                                                             | +       | <    | 0.3±0.1 | >    | 0.2±0.0 | > | 0.1±0.0                                                                               | >    | 0.1±0.0                                                                  | >    | +       | =                                                                      | +       | <    | 0.2±0.1 | > | 0.1±0.0 | 0.1±0.1 | 0.2±0.1 | = | 0.2±0.0 | = | 0.1±0.0 | = | 0.2±0.1 | = |
| 55:0           | 0.3±0.2                                                                | =    | 0.2±0.0 | >    | 0.1±0.1 | =    | +       | =                                                                             | +       | <    | 0.2±0.1 | >    | 0.2±0.1 | = | 0.2±0.0                                                                               | >    | 0.1±0.0                                                                  | =    | +       | =                                                                      | +       | <    | 0.3±0.2 | > | 0.2±0.1 | 0.2±0.1 | 0.2±0.0 | = | 0.2±0.0 | = | 0.1±0.0 | = | 0.1±0.1 | = |
| 55:9           | 0.1±0.1                                                                | =    | 0.1±0.0 | =    | 0.1±0.0 | =    | 0.1±0.0 | >                                                                             | +       | <    | 0.1±0.1 | =    | 0.1±0.0 | = | 0.1±0.0                                                                               | =    | 0.1±0.0                                                                  | >    | 0.1±0.0 | =                                                                      | 0.1±0.0 | >    | 0.1±0.0 | = | 0.1±0.1 | +       | +       | = | 0.5±0.4 | = | 0.1±0.0 | = | 0.2±0.1 | = |
| 59:1           | 0.2±0.1                                                                | =    | 0.1±0.0 | >    | 0.1±0.0 | >    | +       | =                                                                             | +       | <    | 0.2±0.1 | >    | 0.2±0.1 | = | 0.1±0.0                                                                               | >    | 0.1±0.0                                                                  | =    | +       | >                                                                      | +       | <    | 0.2±0.1 | > | 0.1±0.0 | 0.1±0.1 | 0.1±0.0 | = | 0.2±0.1 | = | +       | = | 0.1±0.0 | = |
| 14:0/10:0/18:1 | 0.4±0.2                                                                | =    | 0.3±0.1 | >    | 0.1±0.0 | >    | +       | =                                                                             | +       | <    | 0.7±0.4 | >    | 0.3±0.0 | < | 0.4±0.1                                                                               | >    | 0.1±0.0                                                                  | =    | +       | =                                                                      | +       | <    | 0.5±0.3 | > | 0.3±0.1 | 0.3±0.2 | 0.3±0.0 | = | 0.5±0.0 | = | 0.2±0.0 | < | 0.4±0.0 | = |
| 12:0/14:0/14:0 | +                                                                      | =    | +       | >    | -       | <    | +       | =                                                                             | +       | <    | 0.1±0.0 | >    | +       | = | +                                                                                     | =    | +                                                                        | =    | +       | =                                                                      | +       | <    | 0.2±0.1 | > | +       | +       | +       | = | 0.1±0.0 | = | +       | = | 0.1±0.1 | = |
| 14:0/12:0/16:0 | 0.2±0.1                                                                | =    | 0.2±0.0 | >    | 0.1±0.1 | >    | +       | =                                                                             | +       | <    | 0.3±0.2 | >    | 0.2±0.1 | = | 0.3±0.1                                                                               | >    | 0.1±0.0                                                                  | >    | +       | <                                                                      | +       | <    | 0.3±0.1 | > | 0.2±0.2 | 0.2±0.1 | 0.2±0.0 | = | 0.3±0.1 | = | 0.1±0.0 | = | 0.3±0.0 | = |
| 12:0/12:0/16:0 | 0.2±0.1                                                                | =    | 0.2±0.0 | >    | 0.1±0.0 | >    | +       | =                                                                             | +       | <    | 0.3±0.1 | >    | 0.2±0.1 | = | 0.3±0.1                                                                               | >    | 0.1±0.0                                                                  | >    | +       | =                                                                      | +       | <    | 0.4±0.1 | > | 0.2±0.1 | 0.3±0.2 | 0.1±0.0 | = | 0.4±0.0 | = | 0.1±0.0 | = | 0.3±0.3 | = |
| 12:0/16:1/16:0 | 0.3±0.1                                                                | =    | 0.3±0.1 | >    | 0.1±0.0 | >    | +       | =                                                                             | +       | <    | 0.2±0.1 | >    | 0.3±0.1 | = | 0.4±0.0                                                                               | >    | 0.1±0.0                                                                  | >    | +       | >                                                                      | +       | <    | 0.3±0.1 | > | 0.2±0.1 | 0.2±0.1 | 0.4±0.0 | = | 0.1±0.0 | = | 0.4±0.0 | = | 0.1±0.0 | = |
| 14:0/15:0/14:0 | 0.2±0.1                                                                | =    | 0.2±0.0 | >    | 0.1±0.0 | >    | +       | >                                                                             | +       | <    | 0.2±0.1 | >    | 0.1±0.0 | = | 0.2±0.0                                                                               | >    | 0.1±0.0                                                                  | >    | +       | =                                                                      | +       | <    | 0.2±0.0 | > | 0.1±0.1 | 0.1±0.1 | 0.2±0.0 | = | 0.2±0.0 | = | 0.1±0.0 | < | 0.2±0.1 | = |

|                                 |         |   |         |   |         |   |         |   |         |   |         |   |                                                 |   |   |         |   |         |   |         |         |         |         |         |         |     |         |   |         |   |
|---------------------------------|---------|---|---------|---|---------|---|---------|---|---------|---|---------|---|-------------------------------------------------|---|---|---------|---|---------|---|---------|---------|---------|---------|---------|---------|-----|---------|---|---------|---|
| 14:0/16:1/14:0                  | 0.6±0.4 | = | 0.4±0.0 | > | 0.1±0.0 | > | +       | < | +       | < | 0.3±0.1 | > | 0.4±0.1=0.5±0.1>0.1±0.0>                        | + | = | +       | < | 0.4±0.2 | > | 0.3±0.1 | 0.3±0.2 | 0.5±0.0 | 0.4±0.2 | =       | 0.1±0.0 | =   | 0.2±0.0 | = |         |   |
| 14:0/18:3/14:0                  | 0.6±0.1 | > | 0.3±0.0 | = | 0.3±0.0 | > | 0.2±0.1 | < | 0.3±0.0 | = | 0.3±0.1 | = | 0.5±0.1>0.4±0.0>0.2±0.1>0.1±0.0<0.1±0.0<0.4±0.1 | > |   |         |   |         |   | 0.3±0.1 | 0.2±0.0 | 0.6±0.0 | 0.4±0.0 | =       | 0.5±0.0 | =   | 0.4±0.0 | = |         |   |
| 14:0/16:0/14:0                  | 0.5±0.2 | = | 0.4±0.0 | > | 0.1±0.0 | > | +       | = | 0.1±0.0 | < | 0.5±0.1 | > | 0.4±0.1=0.5±0.2>0.1±0.0>                        | + | = | +       | < | 0.4±0.1 | > | 0.4±0.2 | 0.4±0.1 | 0.4±0.1 | 0.5±0.2 | =       | 0.2±0.0 | =   | 0.3±0.0 | = |         |   |
| 15:0/14:0/16:0                  | 0.4±0.3 | = | 0.4±0.0 | > | 0.1±0.0 | > | +       | = | +       | < | 0.3±0.2 | > | 0.3±0.1=0.5±0.1>0.1±0.0>                        | + | = | +       | < | 0.3±0.1 | > | 0.3±0.3 | 0.3±0.1 | 0.3±0.0 | 0.4±0.0 | =       | 0.1±0.0 | =   | 0.2±0.0 | = |         |   |
| 16:0/14:0/16:0                  | 0.8±0.5 | = | 0.8±0.0 | > | 0.2±0.0 | > | 0.1±0.0 | = | 0.1±0.0 | < | 0.8±0.2 | > | 0.7±0.2=0.9±0.3>0.2±0.0>0.1±0.0=0.1±0.0<0.9±0.2 | > |   |         |   |         |   | 0.7±0.5 | 0.8±0.3 | 0.7±0.0 | 0.8±0.1 | =       | 0.3±0.0 | =   | 0.7±0.2 | = |         |   |
| 14:0/18:1/16:0                  | 2.0±0.2 | > | 1.2±0.1 | > | 0.9±0.0 | < | 1.3±0.1 | < | 1.9±0.1 | < | 3.0±0.7 | > | 2.0±0.4=1.7±0.2>1.3±0.2<1.7±0.2>1.3±0.2<3.0±0.8 | > |   |         |   |         |   | 3.5±0.4 | 4.6±0.5 | 2.3±0.2 | 2.6±0.4 | =       | 3.3±0.2 | >   | 2.7±1.1 | = |         |   |
| 16:2/14:0/18:3                  | 1.1±0.2 | > | 0.7±0.2 | = | 0.8±0.1 | = | 0.7±0.2 | = | 0.9±0.1 | > | 0.7±0.1 | = | 1.0±0.1>0.8±0.1>0.5±0.0=0.4±0.1=0.4±0.1<0.6±0.1 | > |   |         |   |         |   | 0.9±0.1 | 0.5±0.1 | 1.4±0.2 | 0.5±0.0 | =       | 1.2±0.0 | =   | 0.6±0.2 | = |         |   |
| 16:0/14:0/16:1                  | 1.0±0.7 | = | 0.7±0.1 | > | 0.2±0.0 | > | 0.1±0.0 | < | 0.1±0.0 | < | 0.5±0.3 | > | 0.7±0.2=1.0±0.2>0.2±0.1>                        | + | = | +       | < | 0.7±0.4 | > | 0.5±0.3 | 0.5±0.3 | 0.9±0.1 | 0.7±0.2 | =       | 0.3±0.0 | =   | 0.5±0.2 | = |         |   |
| 14:1/16:0/16:1                  | 0.8±0.5 | = | 0.5±0.1 | > | 0.1±0.1 | > | +       | < | 0.1±0.0 | < | 0.4±0.1 | > | 0.5±0.1=0.7±0.1>0.1±0.0>                        | + | = | +       | < | 0.4±0.2 | > | 0.4±0.1 | 0.3±0.2 | 0.6±0.1 | 0.3±0.1 | =       | 0.3±0.0 | =   | 0.4±0.1 | = |         |   |
| 16:1/14:0/17:1                  | 0.7±0.5 | = | 0.5±0.2 | > | 0.2±0.0 | > | 0.1±0.0 | > | 0.1±0.0 | < | 0.3±0.2 | > | 0.5±0.1<0.7±0.1>0.2±0.1>0.1±0.0>                | + | < | 0.5±0.3 | > |         |   | 0.3±0.2 | 0.3±0.2 | 0.5±0.1 | 0.4±0.1 | =       | 0.2±0.0 | =   | 0.5±0.0 | = |         |   |
| 16:1/16:0/16:1                  | 0.4±0.2 | = | 0.2±0.1 | = | 0.3±0.1 | = | 0.2±0.2 | = | 0.1±0.0 | < | 0.3±0.1 | = | 0.4±0.2=0.5±0.1=0.4±0.2=0.2±0.0>0.1±0.0<0.6±0.2 | > |   |         |   |         |   | 0.5±0.1 | 0.5±0.2 | 0.4±0.1 | 0.2±0.0 | =       | 1.0±0.2 | >   | 0.3±0.2 | = |         |   |
| 14:0/18:4/16:1 + 16:4/14:0/18:1 | +       | = | +       | < | 0.1±0.0 | > | +       | = | +       | < | 0.1±0.0 | > | 0.1±0.0=0.1±0.0=0.1±0.0>                        | + | = | +       | = | 0.2±0.1 | = | 0.1±0.0 | +       | 0.1±0.0 | 0.1±0.1 | =       | 0.1±0.0 | =   | 0.1±0.1 | = |         |   |
| 16:2/14:0/18:3                  | 0.1±0.0 | = | 0.1±0.1 | = | 0.1±0.0 | > | +       | = | +       | < | 0.2±0.1 | > | 0.1±0.0=0.1±0.0>0.1±0.0>                        | + | = | +       | = | 0.1±0.2 | = | 0.1±0.0 | +       | 0.1±0.0 | 0.3±0.2 | =       | +       | =   | 0.1±0.0 | = |         |   |
| 14:0/22:0/18:0                  | 0.7±0.4 | = | 0.3±0.0 | > | 0.1±0.0 | > | +       | = | +       | < | 0.2±0.1 | > | 0.6±0.2>0.3±0.1>0.1±0.0>                        | + | = | +       | < | 0.2±0.0 | > | 0.5±0.4 | 0.2±0.1 | 0.7±0.3 | 0.2±0.1 | =       | 0.1±0.0 | =   | 0.2±0.1 | = |         |   |
| 18:1/14:0/18:1                  | 0.9±0.0 | > | 0.5±0.1 | > | 0.4±0.0 | < | 0.8±0.2 | < | 1.1±0.0 | > | 0.8±0.2 | = | 0.6±0.1=0.6±0.1>0.4±0.1<0.6±0.0>0.4±0.1=0.6±0.3 | = |   |         |   |         |   | 1.1±0.1 | 1.3±0.1 | 0.8±0.0 | 0.6±0.0 | =       | 0.8±0.0 | >   | 0.7±0.3 | = |         |   |
| 16:1/14:0/18:2                  | 0.1±0.0 | > | 0.1±0.0 | = | +       | = | +       | > | -       | < | 0.1±0.0 | > | 0.1±0.0=0.1±0.0>                                | + | = | +       | = | +       | < | 0.1±0.1 | >       | 0.1±0.1 | +       | 0.1±0.0 | 0.1±0.1 | =   | 0.1±0.0 | = | 0.1±0.0 | = |
| 16:3/14:0/18:2                  | +       | = | +       | = | +       | > | +       | < | +       | < | 0.1±0.1 | > | 0.1±0.0=0.1±0.0=                                | + | > | +       | = | +       | < | 0.1±0.0 | >       | 0.1±0.0 | +       | 0.1±0.0 | 0.2±0.0 | =   | 0.1±0.0 | = | 0.1±0.1 | = |
| 18:1/14:0/18:2                  | 0.8±0.2 | = | 0.6±0.1 | < | 0.7±0.1 | < | 2.0±0.6 | = | 2.7±0.2 | > | 1.0±0.1 | < | 0.8±0.2=0.7±0.1=0.8±0.2<1.4±0.1=1.3±0.2>0.6±0.3 | < |   |         |   |         |   | 0.9±0.1 | 0.8±0.1 | 0.8±0.1 | 0.7±0.3 | =       | 0.8±0.0 | =   | 0.7±0.1 | = |         |   |
| 18:2/14:0/18:2                  | 0.8±0.4 | = | 0.8±0.1 | < | 1.1±0.1 | < | 2.1±0.5 | = | 2.4±0.1 | > | 0.9±0.0 | < | 1.2±0.3=0.9±0.2=1.2±0.2<1.6±0.1<2.0±0.2>0.7±0.2 | < |   |         |   |         |   | 0.9±0.1 | 0.6±0.1 | 1.0±0.2 | 0.7±0.1 | =       | 1.2±0.0 | =   | 0.7±0.2 | = |         |   |
| 14:0/18:2/18:3                  | 0.5±0.3 | = | 0.6±0.1 | < | 1.1±0.2 | = | 1.2±0.2 | = | 1.3±0.0 | > | 0.7±0.0 | < | 0.9±0.2=0.8±0.2=1.0±0.1=1.0±0.0<1.3±0.1>0.6±0.2 | < |   |         |   |         |   | 0.4±0.1 | 0.3±0.1 | 0.7±0.0 | 0.6±0.3 | =       | 0.7±0.1 | =   | 0.7±0.3 | = |         |   |
| 18:3/14:0/18:3                  | 0.3±0.1 | < | 0.5±0.1 | < | 0.8±0.2 | > | 0.3±0.1 | = | 0.4±0.0 | > | 0.1±0.0 | < | 0.6±0.1>0.5±0.1=0.5±0.1>0.2±0.0<0.3±0.0=0.2±0.1 | = |   |         |   |         |   | 0.3±0.1 | 0.1±0.0 | 0.5±0.1 | 0.2±0.0 | >       | 0.6±0.1 | =   | 0.2±0.2 | = |         |   |
| 18:2/16:2/18:3 + 14:0/20:4/18:3 | 0.1±0.1 | < | 0.2±0.1 | < | 0.4±0.1 | = | 0.4±0.0 | > | 0.3±0.0 | = | 0.1±0.1 | < | 0.2±0.1=0.2±0.1<0.4±0.0=0.3±0.0<0.5±0.1>0.2±0.2 | = |   |         |   |         |   | 0.1±0.0 | +       | 0.1±0.0 | 0.2±0.1 | =       | 0.1±0.1 | =   | 0.1±0.1 | = |         |   |
| 14:0/18:1/18:4                  | 0.2±0.1 | = | 0.2±0.0 | < | 0.4±0.0 | = | 0.3±0.1 | = | 0.3±0.1 | > | 0.1±0.0 | < | 0.5±0.3=0.3±0.1=0.4±0.0=0.4±0.0=0.3±0.0=0.3±0.1 | < |   |         |   |         |   | 0.3±0.1 | 0.2±0.1 | 0.3±0.1 | 0.2±0.1 | =       | 0.7±0.1 | =   | 0.4±0.0 | = |         |   |
| 14:0/18:4/18:2                  | 0.2±0.1 | = | 0.2±0.0 | < | 0.3±0.1 | = | 0.3±0.0 | = | 0.3±0.0 | = | 0.2±0.0 | = | 0.4±0.1=0.4±0.1=0.4±0.1=0.4±0.0>0.4±0.0=0.3±0.1 | = |   |         |   |         |   | 0.2±0.1 | 0.1±0.1 | 0.3±0.1 | 0.3±0.1 | =       | 0.3±0.0 | =   | 0.3±0.1 | = |         |   |
| 14:0/18:3/18:4                  | 0.3±0.1 | = | 0.3±0.0 | < | 0.5±0.1 | > | 0.2±0.1 | = | 0.2±0.0 | < | 0.3±0.1 | > | 0.5±0.1=0.5±0.1=0.4±0.0>0.3±0.0<0.3±0.0=0.3±0.2 | = |   |         |   |         |   | 0.4±0.1 | 0.2±0.0 | 0.4±0.0 | 0.3±0.1 | =       | 0.7±0.0 | =   | 0.5±0.2 | = |         |   |
| 16:0/14:0/20:4                  | 0.2±0.0 | = | 0.1±0.1 | = | 0.1±0.0 | > | 0.1±0.0 | < | 0.1±0.0 | < | 0.3±0.1 | > | 0.1±0.1=0.1±0.0=0.1±0.0=0.1±0.0=0.1±0.0<0.3±0.1 | > |   |         |   |         |   | 0.2±0.0 | 0.2±0.0 | 0.2±0.0 | 0.4±0.1 | =       | 0.2±0.0 | =   | 0.4±0.0 | = |         |   |
| 18:2/16:0/18:4 + 18:2/14:0/20:4 | 0.5±0.3 | < | 1.0±0.1 | = | 1.1±0.1 | > | 1.0±0.1 | = | 1.0±0.1 | < | 1.4±0.2 | > | 0.6±0.1=0.8±0.1<1.1±0.1<1.3±0.1>1.0±0.1=1.2±0.4 | = |   |         |   |         |   | 0.6±0.0 | 0.5±0.3 | 0.7±0.1 | 1.4±0.6 | =       | 0.7±0.1 | =   | 1.4±0.4 | = |         |   |
| 20:4/14:0/20:4                  | 0.2±0.1 | < | 0.6±0.2 | < | 1.2±0.2 | > | 0.3±0.0 | < | 0.3±0.0 | < | 0.9±0.2 | > | 0.2±0.1<0.5±0.0<0.8±0.2>0.3±0.1=0.3±0.0<0.6±0.3 | > |   |         |   |         |   | 0.2±0.1 | 0.4±0.2 | 0.4±0.1 | 1.1±0.5 | =       | 0.3±0.0 | =   | 0.9±0.1 | = |         |   |
| 16:0/14:0/20:5                  | 0.1±0.0 | = | 0.1±0.0 | < | 0.1±0.0 | = | 0.1±0.0 | = | 0.1±0.0 | < | 0.1±0.0 | > | 0.1±0.1>+ =0.1±0.0=0.1±0.0=0.1±0.0<0.2±0.0      | > |   |         |   |         |   | 0.2±0.0 | 0.2±0.0 | 0.1±0.0 | 0.2±0.1 | =       | 0.3±0.0 | =   | 0.2±0.1 | = |         |   |
| 16:1/14:0/20:5                  | 0.1±0.1 | = | 0.1±0.0 | < | 0.4±0.1 | > | 0.2±0.1 | = | 0.1±0.0 | = | 0.1±0.0 | = | 0.2±0.1=0.3±0.1=0.3±0.1>0.2±0.1=0.2±0.0=0.2±0.1 | = |   |         |   |         |   | 0.2±0.0 | 0.1±0.1 | 0.2±0.0 | 0.1±0.1 | =       | 0.7±0.1 | >   | 0.1±0.1 | = |         |   |
| 14:0/18:1/20:5                  | 0.4±0.2 | = | 0.5±0.0 | < | 0.8±0.1 | = | 1.1±0.3 | = | 0.8±0.0 | > | 0.6±0.2 | < | 0.7±0.3=0.8±0.3=1.1±0.1=1.2±0.2=1.1±0.1>0.7±0.1 | < |   |         |   |         |   | 0.6±0.0 | 0.6±0.1 | 0.5±0.0 | 0.4±0.2 | =       | 1.3±0.1 | =   | 0.7±0.2 | = |         |   |
| 14:0/18:2/20:5                  | 0.9±0.5 | < | 2.2±0.3 | < | 3.1±0.3 | > | 2.3±0.1 | = | 2.2±0.1 | > | 1.2±0.1 | < | 1.3±0.3=1.9±0.5<2.5±0.1>1.7±0.1<2.2±0.1>1.4±0.4 | = |   |         |   |         |   | 1.2±0.3 | 0.9±0.3 | 1.2±0.0 | 1.2±0.3 | =       | 1.9±0.1 | =   | 1.5±0.0 | = |         |   |
| 14:0/18:3/20:5 + 18:4/14:0/20:4 | 0.6±0.3 | < | 1.4±0.2 | < | 2.1±0.3 | > | 0.9±0.1 | = | 1.0±0.0 | = | 0.9±0.2 | = | 1.0±0.1=1.1±0.2=1.3±0.3>0.7±0.1<1.0±0.0=0.9±0.2 | = |   |         |   |         |   | 0.7±0.1 | 0.6±0.2 | 0.9±0.0 | 0.9±0.0 | =       | 1.2±0.1 | =   | 1.1±0.2 | = |         |   |
| 18:4/14:0/20:5                  | 0.5±0.2 | = | 0.3±0.0 | < | 0.5±0.1 | > | 0.3±0.0 | < | 0.4±0.0 | = | 0.4±0.2 | = | 0.8±0.2>0.5±0.1=0.5±0.1=0.5±0.1=0.5±0.0=0.5±0.1 | = |   |         |   |         |   | 0.4±0.1 | 0.3±0.1 | 0.7±0.0 | 0.3±0.0 | =       | 1.1±0.0 | =   | 0.7±0.1 | = |         |   |
| 16:1/14:1/16:1 + 14:1/16:1/16:1 | 0.1±0.0 | > | 0.1±0.0 | = | 0.1±0.0 | > | +       | = | +       | < | 0.2±0.1 | > | 0.1±0.0=0.1±0.1>0.1±0.0>                        | + | > | +       | < | 0.2±0.0 | > | 0.1±0.1 | 0.1±0.0 | 0.1±0.0 | 0.1±0.0 | =       | 0.1±0.0 | =   | 0.2±0.1 | = |         |   |
| 14:0/18:2/16:1 + 16:1/14:0/18:2 | 0.2±0.1 | = | 0.2±0.0 | < | 0.2±0.0 | = | 0.2±0.0 | = | 0.2±0.0 | = | 0.2±0.1 | = | 0.3±0.1=0.2±0.0=0.2±0.0=0.2±0.0=0.2±0.0=0.2±0.1 | = |   |         |   |         |   | 0.1±0.0 | 0.1±0.0 | 0.3±0.0 | 0.3±0.1 | =       | 0.2±0.0 | =   | 0.1±0.0 | = |         |   |
| 16:0/15:0/16:0                  | 0.5±0.3 | = | 0.6±0.0 | > | 0.1±0.0 | > | 0.1±0.0 | = | +       | < | 0.5±0.3 | > | 0.5±0.2=0.6±0.2>0.1±0.0>                        | + | = | +       | < | 0.4±0.1 | > | 0.4±0.4 | 0.4±0.2 | 0.4±0.0 | 0.6±0.2 | =       | 0.2±0.0 | =</ |         |   |         |   |

|                                 |                                                                                                                         |                                                        |
|---------------------------------|-------------------------------------------------------------------------------------------------------------------------|--------------------------------------------------------|
| 16:1/15:0/18:2                  | 0.1±0.1 = + = + > + < + < 0.1±0.0 > + < 0.1±0.0 > + > + = + = 0.1±0.1 =                                                 | 0.1±0.0 + 0.1±0.0 0.2±0.1 = + = 0.1±0.1 =              |
| 14:0/16:1/16:0                  | 0.9±0.4 = 0.5±0.1 > 0.4±0.0 > 0.3±0.0 < 0.4±0.0 < 0.8±0.1 > 0.9±0.3 = 0.7±0.1 > 0.4±0.1 > 0.3±0.0 = 0.3±0.0 < 0.8±0.3 > | 0.8±0.2 0.9±0.1 1.0±0.1 0.8±0.1 = 1.4±0.0 = 0.5±0.0 =  |
| 14:0/18:2/16:0                  | 1.9±0.2 > 1.3±0.1 = 1.3±0.1 < 2.4±0.7 < 3.7±0.3 > 2.1±0.1 = 1.8±0.2 = 1.7±0.1 > 1.3±0.2 = 1.7±0.4 = 1.8±0.2 = 1.7±0.4 = | 2.0±0.3 1.9±0.2 2.0±0.1 2.0±0.7 = 2.0±0.0 = 1.9±0.0 =  |
| 14:0/16:0/18:4                  | 0.1±0.1 = 0.1±0.0 = 0.1±0.0 > + < 0.1±0.0 < 0.2±0.0 > 0.2±0.1 > 0.1±0.0 = 0.1±0.0 = 0.1±0.0 = 0.1±0.0 < 0.3±0.1 >       | 0.2±0.1 0.2±0.1 0.2±0.0 0.2±0.0 = 0.6±0.1 > 0.2±0.1 =  |
| 16:0/16:0/16:0                  | 1.3±0.9 = 1.3±0.1 > 0.3±0.0 > 0.1±0.0 = 0.1±0.0 < 1.0±0.4 > 0.8±0.3 = 1.2±0.3 > 0.3±0.0 > 0.1±0.0 = 0.1±0.0 < 0.9±0.3 > | 1.0±0.8 1.0±0.5 0.9±0.2 1.0±0.3 = 0.3±0.0 = 0.6±0.1 =  |
| 16:0/16:0/18:0                  | 0.5±0.3 = 0.6±0.1 > 0.1±0.0 > + = + < 0.4±0.2 > 0.3±0.1 = 0.4±0.1 > 0.1±0.0 > + = + < 0.4±0.1 >                         | 0.3±0.2 0.4±0.3 0.3±0.1 0.4±0.1 = 0.1±0.0 = 0.3±0.0 =  |
| 16:0/18:1/16:0                  | 3.5±0.6 > 2.0±0.1 > 1.1±0.0 < 1.6±0.1 < 2.1±0.1 < 3.3±0.3 > 4.0±0.7 > 2.1±0.5 > 1.3±0.2 < 2.3±0.2 > 1.4±0.3 < 4.7±1.5 > | 7.1±1.5 10.5±1.1 4.0±0.3 3.6±0.5 = 3.9±0.5 = 5.3±3.0 = |
| 16:0/18:2/16:0                  | 2.7±0.6 > 2.0±0.1 > 1.4±0.2 < 2.9±0.8 < 3.9±0.4 > 2.7±0.4 = 2.3±0.4 = 2.2±0.4 > 1.4±0.1 < 2.4±0.6 = 1.9±0.5 = 2.4±0.8 = | 4.0±0.2 4.0±0.8 2.6±0.1 2.6±0.7 = 2.8±0.4 = 2.5±0.3 =  |
| 16:0/16:0/18:3                  | 1.4±0.1 > 1.2±0.1 > 1.0±0.0 = 1.1±0.3 = 1.2±0.1 > 0.9±0.2 = 1.0±0.2 = 0.9±0.2 > 0.6±0.0 = 0.7±0.1 = 0.5±0.1 < 0.9±0.1 > | 1.5±0.2 0.9±0.1 1.7±0.3 0.7±0.0 = 1.4±0.1 > 0.9±0.0 =  |
| 16:0/24:0/16:0                  | 0.2±0.2 = 0.2±0.0 > 0.1±0.0 = + = + = 0.3±0.2 = 0.2±0.1 = 0.2±0.1 > + > + = + < 0.2±0.1 >                               | 0.2±0.1 0.2±0.1 0.2±0.1 0.1±0.0 = 0.1±0.0 = 0.2±0.1 =  |
| 16:0/16:1/16:0                  | 1.3±1.0 = 0.8±0.1 > 0.2±0.1 > 0.1±0.0 < 0.1±0.0 < 0.6±0.2 > 1.0±0.4 = 1.1±0.3 > 0.3±0.0 > 0.1±0.0 > + < 0.7±0.3 >       | 0.6±0.4 0.6±0.3 1.0±0.0 0.6±0.3 = 0.3±0.0 = 0.4±0.1 =  |
| 16:0/16:1/16:1                  | 0.9±0.7 = 0.6±0.1 > 0.1±0.0 > - < 0.1±0.0 < 0.4±0.2 > 0.7±0.3 = 0.9±0.1 > 0.2±0.0 > - # - < 0.5±0.2 >                   | 0.5±0.3 0.5±0.3 0.8±0.1 0.5±0.2 = 0.4±0.1 = 0.2±0.1 =  |
| 16:0/18:1/16:4                  | + = + = 0.1±0.1 = 0.1±0.0 = + = 0.1±0.1 = 0.1±0.0 = + < 0.1±0.0 > 0.1±0.0 < 0.1±0.0 < 0.1±0.0 >                         | + + + 0.1±0.0 = 0.1±0.0 = + =                          |
| 18:0/16:0/18:0 + 16:0/18:0/18:0 | 0.2±0.1 = 0.3±0.0 > 0.1±0.0 > + = + < 0.3±0.2 > 0.2±0.0 = 0.2±0.1 > 0.1±0.0 > + = + < 0.2±0.1 >                         | 0.2±0.1 0.2±0.1 0.2±0.0 0.2±0.0 = 0.1±0.0 < 0.2±0.0 =  |
| 16:0/18:1/18:0                  | 1.7±0.0 > 0.9±0.1 > 0.5±0.1 = 0.4±0.0 < 0.7±0.0 < 1.8±0.2 > 1.5±0.1 > 0.9±0.3 > 0.6±0.0 = 0.7±0.1 = 0.5±0.2 < 1.8±0.5 > | 2.3±0.2 5.1±0.6 1.5±0.1 1.6±0.1 = 1.5±0.2 = 2.1±0.7 =  |
| 17:1/16:0/18:1                  | 0.4±0.3 = 0.3±0.1 > 0.1±0.0 = 0.1±0.0 < 0.1±0.0 < 0.4±0.2 > 0.3±0.1 = 0.5±0.1 > 0.1±0.0 > + = + < 0.5±0.2 >             | 0.3±0.2 0.4±0.3 0.4±0.2 0.6±0.3 = 0.2±0.0 = 0.4±0.2 =  |
| 18:1/16:0/18:1                  | 2.9±0.3 > 2.2±0.1 > 1.2±0.2 = 1.6±0.5 = 2.1±0.1 = 2.2±0.4 = 2.1±0.3 = 1.6±0.3 > 1.2±0.0 = 1.3±0.1 > 0.9±0.3 < 2.3±0.6 > | 6.2±0.9 5.3±0.3 2.5±0.4 1.9±0.4 = 3.0±0.3 = 2.3±1.6 =  |
| 18:1/16:0/18:2                  | 2.4±0.2 = 2.3±0.5 > 1.5±0.3 < 3.0±1.0 = 3.6±0.2 > 2.3±0.8 = 2.0±0.5 = 1.6±0.3 = 1.5±0.1 < 2.3±0.2 = 1.9±0.5 = 1.8±0.7 = | 4.2±0.5 2.8±0.3 2.0±0.1 2.1±0.3 = 2.4±0.1 = 1.7±0.5 =  |
| 18:1/16:0/20:4                  | 0.6±0.3 = 0.3±0.1 = 0.3±0.1 < 0.7±0.1 < 1.0±0.0 = 0.8±0.4 = 0.6±0.1 > 0.3±0.0 < 0.5±0.0 < 0.8±0.0 > 0.7±0.1 > 0.4±0.2 < | 0.6±0.1 0.6±0.1 0.6±0.1 0.7±0.1 = 0.7±0.0 = 0.7±0.1 =  |
| 16:1/16:0/18:2                  | 0.2±0.1 = 0.1±0.0 = 0.1±0.0 = + > - < 0.1±0.0 = 0.1±0.1 = 0.2±0.0 > 0.1±0.0 = 0.1±0.0 > + < 0.2±0.0 >                   | 0.1±0.0 0.1±0.1 0.2±0.0 0.2±0.1 = 0.1±0.0 = 0.1±0.0 =  |
| 17:1/16:0/18:2                  | 0.1±0.0 = 0.1±0.0 = + = + = + = 0.1±0.1 = 0.1±0.1 = 0.1±0.1 = + = + = + < 0.1±0.0 >                                     | 0.1±0.1 0.1±0.1 0.1±0.1 0.2±0.0 = 0.1±0.0 = 0.1±0.0 =  |
| 16:1/16:0/18:3 + 16:3/16:0/18:1 | 0.3±0.0 = 0.2±0.0 = 0.3±0.1 = 0.2±0.1 = 0.2±0.0 = 0.4±0.2 = 0.2±0.0 = 0.2±0.0 = 0.2±0.0 < 0.3±0.0 > 0.2±0.0 < 0.3±0.0 < | 0.2±0.1 0.2±0.0 0.4±0.0 0.6±0.3 = 0.2±0.1 = 0.4±0.0 >  |
| 18:3/16:0/18:3 + 18:2/16:1/18:3 | 0.7±0.3 < 1.1±0.0 < 1.7±0.2 > 0.9±0.1 = 0.9±0.1 > 0.5±0.2 < 0.9±0.1 = 0.8±0.2 < 1.1±0.2 > 0.6±0.0 < 0.8±0.0 > 0.5±0.1 < | 0.7±0.1 0.3±0.1 1.3±0.2 0.5±0.1 = 1.0±0.2 = 0.5±0.0 =  |
| 16:4/16:0/18:4                  | 0.1±0.1 = 0.2±0.0 > 0.1±0.0 > 0.1±0.0 = 0.1±0.0 < 0.3±0.1 > 0.2±0.2 = 0.2±0.1 > 0.1±0.0 > 0.1±0.0 < 0.1±0.0 < 0.2±0.1 > | 0.1±0.0 0.1±0.0 0.2±0.0 0.4±0.4 = 0.3±0.0 = 0.2±0.0 =  |
| 18:1/16:0/18:4 + 16:0/16:1/20:4 | 0.4±0.2 = 0.4±0.0 = 0.4±0.0 = 0.4±0.2 = 0.4±0.0 < 1.0±0.1 > 0.6±0.2 = 0.6±0.2 < 0.9±0.1 < 1.4±0.2 > 0.7±0.1 = 0.7±0.1 < | 0.7±0.1 0.7±0.1 0.6±0.0 0.9±0.0 = 0.8±0.1 = 0.8±0.0 =  |
| 16:0/16:0/20:4                  | 0.1±0.0 = 0.1±0.0 = 0.1±0.0 = + < 0.1±0.0 < 0.1±0.0 > 0.1±0.0 > 0.1±0.0 = + = + = + < 0.2±0.1 >                         | 0.1±0.0 0.2±0.0 0.1±0.0 0.2±0.1 = 0.1±0.0 = 0.3±0.1 =  |
| 18:0/16:0/20:5                  | 0.4±0.2 = 0.6±0.0 > 0.4±0.1 = 0.4±0.1 = 0.4±0.0 < 1.5±0.4 > 0.3±0.1 = 0.4±0.1 = 0.4±0.1 = 0.5±0.1 = 0.4±0.0 < 0.7±0.1 = | 0.3±0.0 0.6±0.1 0.4±0.0 1.3±0.2 = 0.3±0.0 = 0.9±0.2 =  |
| 16:0/18:2/20:4                  | 0.4±0.1 < 1.3±0.2 = 0.9±0.3 = 0.7±0.1 < 0.9±0.1 < 1.5±0.3 > 0.3±0.0 < 0.6±0.2 = 0.6±0.2 = 0.5±0.1 = 0.7±0.1 = 1.0±0.4 > | 0.2±0.0 0.3±0.2 0.4±0.1 1.6±0.4 = 0.3±0.0 < 1.3±0.6 =  |
| 18:2/16:0/20:4                  | 0.6±0.3 = 0.4±0.1 = 0.4±0.1 < 0.5±0.0 = 0.6±0.0 > 0.4±0.1 < 0.5±0.1 > 0.3±0.0 < 0.6±0.1 < 0.7±0.1 > 0.5±0.1 = 0.4±0.1 < | 0.5±0.1 0.4±0.1 0.7±0.2 0.3±0.0 = 0.6±0.0 = 0.5±0.1 =  |
| 18:3/16:0/20:4                  | 0.2±0.1 = 0.3±0.1 = 0.3±0.0 = 0.3±0.1 = 0.2±0.0 = 0.2±0.1 = 0.3±0.1 = 0.2±0.1 = 0.2±0.1 = 0.3±0.1 = 0.2±0.0 > 0.2±0.0 < | 0.2±0.1 0.2±0.1 0.4±0.0 0.3±0.0 = 0.3±0.0 = 0.4±0.0 >  |
| 20:4/16:0/20:4                  | 0.2±0.1 = 0.3±0.3 = 0.1±0.0 = 0.1±0.0 < 0.2±0.0 < 0.9±0.4 > 0.2±0.0 = 0.1±0.1 = 0.1±0.0 < 0.2±0.1 = 0.2±0.0 < 0.8±0.2 > | 0.1±0.0 0.4±0.1 0.2±0.0 1.5±0.9 = 0.2±0.0 = 1.2±0.1 =  |
| 16:0/16:0/20:5                  | 0.1±0.0 = 0.1±0.0 = 0.1±0.0 = 0.1±0.0 = 0.1±0.0 < 0.1±0.1 > 0.1±0.0 = 0.1±0.0 = 0.1±0.0 = 0.1±0.0 = 0.1±0.0 < 0.2±0.0 > | 0.2±0.1 0.3±0.0 0.1±0.0 0.2±0.1 = 0.3±0.0 > 0.2±0.0 =  |
| 16:0/18:1/20:5                  | 0.8±0.4 < 1.4±0.1 < 1.9±0.2 = 2.5±0.9 > 1.4±0.0 = 1.5±0.4 = 1.0±0.4 = 1.4±0.4 < 2.7±0.6 < 3.4±0.1 > 2.2±0.2 > 1.3±0.3 < | 1.6±0.2 1.9±0.1 0.9±0.0 0.9±0.1 = 1.6±0.0 = 1.4±0.7 =  |
| 16:0/18:2/20:5                  | 1.2±0.6 < 3.5±0.3 < 5.5±0.5 = 5.1±0.1 > 3.8±0.2 > 1.9±0.5 < 1.3±0.3 < 2.3±0.3 < 3.8±0.4 = 3.9±0.4 = 3.9±0.3 > 1.6±0.4 < | 1.5±0.2 1.3±0.3 1.5±0.1 1.6±0.2 = 1.9±0.1 = 2.0±0.3 =  |
| 18:3/16:0/20:5                  | 0.9±0.5 < 1.6±0.2 < 3.0±0.4 > 1.8±0.2 > 1.5±0.1 > 0.7±0.2 < 1.0±0.1 = 1.0±0.2 < 1.4±0.2 = 1.3±0.2 = 1.4±0.1 > 0.8±0.2 < | 0.8±0.2 0.6±0.2 1.3±0.2 0.9±0.2 = 1.5±0.0 > 1.1±0.2 =  |
| 18:4/16:0/20:5                  | 1.0±0.7 = 0.7±0.1 < 1.1±0.1 > 0.9±0.2 < 1.2±0.1 = 1.2±0.2 > 1.2±0.1 > 0.7±0.1 < 1.1±0.2 = 1.1±0.0 > 1.0±0.0 < 1.1±0.1 = | 1.2±0.4 1.0±0.2 1.6±0.0 1.1±0.1 = 2.1±0.2 > 1.3±0.0 >  |
| 20:4/16:0/20:5                  | 0.5±0.3 = 0.3±0.0 = 0.3±0.1 = 0.2±0.1 < 0.4±0.1 = 0.4±0.1 > 0.7±0.0 > 0.2±0.0 < 0.3±0.0 < 0.5±0.0 = 0.5±0.0 < 0.6±0.1 > | 0.5±0.2 0.7±0.1 0.4±0.1 0.6±0.0 = 0.8±0.0 > 0.8±0.1 =  |
| 20:5/16:0/20:5                  | 0.1±0.0 < 0.2±0.0 < 0.3±0.0 > 0.1±0.1 = 0.1±0.0 = 0.1±0.1 = 0.1±0.1 = 0.2±0.1 = 0.3±0.0 > 0.2±0.0 < 0.2±0.0 = 0.3±0.2 = | 0.3±0.1 0.3±0.1 0.1±0.1 0.4±0.1 = 0.4±0.1 > 0.3±0.0 =  |
| 16:0/26:0/16:1 + 16:0/24:0/18:1 | 0.3±0.2 = 0.1±0.0 > 0.1±0.0 = + = + = 0.2±0.2 = 0.2±0.1 = 0.2±0.0 > 0.1±0.0 > + = + < 0.3±0.2 >                         | 0.1±0.1 0.1±0.1 0.2±0.0 0.2±0.1 = 0.1±0.0 = 0.2±0.1 =  |
| 14:0/16:1/16:1                  | 0.7±0.1 > 0.3±0.1 = 0.4±0.0 = 0.5±0.2 < 1.0±0.1 > 0.7±0.0 > 0.7±0.1 = 0.7±0.0 > 0.4±0.0 = 0.3±0.0 < 0.4±0.0 < 0.6±0.1 > | 0.5±0.1 0.4±0.1 0.7±0.2 0.7±0.2 = 0.6±0.0 = 0.7±0.1 =  |

|                                 |                                                             |                                                             |         |         |         |                               |
|---------------------------------|-------------------------------------------------------------|-------------------------------------------------------------|---------|---------|---------|-------------------------------|
| 16:1/16:1/16:1                  | 0.1±0.0 = 0.1±0.0 = 0.1±0.1 = 0.1±0.1 = + < 0.1±0.0 =       | 0.1±0.1 = 0.2±0.0 = 0.1±0.1 = 0.1±0.0 > + < 0.2±0.1 =       | 0.1±0.1 | 0.1±0.1 | 0.1±0.0 | 0.1±0.0 = 0.3±0.0 > 0.1±0.0 = |
| 16:1/18:2/16:1                  | + = + = + = + > + = + =                                     | + = + = + = + = + < 0.1±0.0 >                               | +       | +       | +       | 0.1±0.1 = + = 0.1±0.0 =       |
| 18:2/16:0/20:0                  | 0.5±0.0 = 0.2±0.1 = 0.2±0.1 < 0.4±0.1 < 0.6±0.1 = 0.5±0.1 > | 0.4±0.1 = 0.3±0.0 > 0.2±0.1 < 0.3±0.0 = 0.4±0.1 = 0.4±0.1 = | 0.5±0.0 | -       | 0.4±0.0 | 0.9±0.3 = 0.2±0.0 = 0.4±0.2 = |
| 16:1/17:0/18:1                  | 0.4±0.2 = 0.3±0.1 > + = + < 0.1±0.0 < 0.3±0.1 >             | 0.2±0.1 = 0.3±0.1 > 0.1±0.0 > + = + < 0.2±0.1 =             | 0.3±0.1 | 0.2±0.1 | 0.3±0.2 | 0.2±0.0 = 0.2±0.1 = 0.2±0.1 = |
| 18:1/16:1/18:2                  | 0.1±0.0 = 0.1±0.0 = 0.1±0.0 < 0.2±0.0 = 0.2±0.0 = 0.2±0.1 = | 0.1±0.0 = 0.1±0.0 > 0.1±0.0 < 0.1±0.0 = 0.1±0.0 = 0.1±0.0 < | 0.2±0.0 | 0.1±0.0 | 0.1±0.1 | 0.1±0.1 = 0.1±0.0 = 0.1±0.0 = |
| 18:2/16:1/18:2                  | 0.1±0.1 = 0.1±0.0 = 0.1±0.1 < 0.3±0.1 > 0.2±0.0 > 0.1±0.0 < | 0.1±0.0 < 0.1±0.0 = 0.1±0.0 < 0.2±0.0 = 0.2±0.0 > 0.1±0.0 < | +       | 0.1±0.0 | 0.1±0.0 | 0.1±0.0 = 0.1±0.0 = 0.1±0.1 = |
| 16:1/16:1/20:5                  | 0.1±0.1 > - < 0.1±0.0 = 0.1±0.1 = 0.1±0.0 = 0.1±0.0 =       | 0.2±0.1 > - < 0.2±0.1 > 0.1±0.0 = 0.1±0.0 < 0.2±0.1 >       | 0.1±0.0 | 0.1±0.0 | 0.1±0.1 | 0.2±0.1 = 0.3±0.0 = 0.1±0.0 = |
| 16:2/16:1/20:5                  | 0.1±0.0 = 0.1±0.0 = 0.1±0.0 = 0.1±0.1 > 0.1±0.0 = 0.1±0.1 = | 0.1±0.0 < 0.1±0.0 = 0.2±0.0 = 0.1±0.1 < 0.2±0.0 > 0.1±0.1 = | 0.1±0.0 | +       | 0.1±0.0 | 0.2±0.1 = 0.1±0.0 = 0.1±0.1 = |
| 18:2/16:1/20:5 + 18:3/18:1/18:4 | 0.2±0.1 < 0.4±0.1 < 0.5±0.0 < 0.8±0.2 > 0.4±0.0 = 0.3±0.1 < | 0.5±0.1 = 0.5±0.1 < 0.7±0.1 = 0.9±0.2 > 0.7±0.1 > 0.2±0.1 < | 0.5±0.1 | 0.2±0.1 | 0.3±0.0 | 0.4±0.1 = 0.5±0.1 = 0.2±0.1 = |
| 18:3/16:1/20:5                  | 0.1±0.0 < 0.4±0.0 < 0.5±0.1 = 0.6±0.1 > 0.3±0.1 > 0.1±0.1 < | 0.1±0.1 < 0.3±0.0 < 0.4±0.0 < 0.4±0.0 = 0.5±0.1 > 0.1±0.0 < | 0.1±0.0 | 0.1±0.0 | 0.1±0.0 | 0.2±0.1 = 0.2±0.0 = 0.1±0.0 = |
| 18:4/16:1/20:5                  | 0.1±0.1 < 0.2±0.0 < 0.3±0.1 = 0.4±0.1 = 0.2±0.0 > 0.1±0.0 < | 0.2±0.0 < 0.2±0.0 = 0.3±0.1 = 0.3±0.0 < 0.4±0.1 > 0.1±0.0 < | 0.1±0.0 | +       | 0.1±0.0 | 0.1±0.1 = 0.3±0.0 > 0.2±0.0 > |
| 16:1/16:2/18:2                  | + = + < + = + = + = + = + =                                 | + = + = + = + = + = + < 0.1±0.0 >                           | +       | +       | +       | 0.1±0.1 = + = + <             |
| 18:2/16:2/20:5                  | 0.1±0.0 = 0.2±0.1 = 0.2±0.0 > 0.1±0.0 = 0.1±0.0 = 0.1±0.1 = | 0.1±0.0 = 0.1±0.1 = 0.2±0.0 = 0.1±0.0 = 0.1±0.0 = 0.2±0.1 = | 0.1±0.0 | +       | 0.1±0.0 | 0.1±0.0 = 0.1±0.0 = 0.1±0.0 = |
| 14:0/18:2/16:3                  | 0.1±0.0 = 0.1±0.1 = 0.1±0.0 = 0.1±0.0 = 0.1±0.0 = 0.2±0.1 = | 0.2±0.1 = 0.1±0.0 = 0.1±0.0 > 0.1±0.0 = 0.1±0.0 < 0.2±0.1 > | 0.2±0.0 | 0.1±0.0 | 0.1±0.0 | 0.3±0.0 = 0.4±0.0 > 0.1±0.1 = |
| 16:3/18:2/20:5                  | 0.1±0.0 = 0.1±0.0 = 0.1±0.1 = 0.1±0.0 > + < 0.1±0.0 >       | 0.1±0.0 = 0.1±0.0 = 0.1±0.0 > 0.1±0.0 = 0.1±0.0 < 0.1±0.1 > | +       | +       | 0.1±0.0 | 0.1±0.0 = + < 0.1±0.0 =       |
| 16:1/24:0/17:0                  | 0.2±0.2 = 0.2±0.0 > 0.1±0.0 > + = + = 0.2±0.2 =             | 0.2±0.1 = 0.2±0.0 > 0.1±0.0 > + = + < 0.2±0.1 >             | 0.2±0.1 | 0.2±0.1 | 0.2±0.0 | 0.2±0.1 = 0.1±0.0 = 0.3±0.1 = |
| 18:1/17:0/18:2                  | 0.3±0.2 = 0.2±0.0 > 0.1±0.0 > + < 0.1±0.0 < 0.4±0.1 >       | 0.3±0.1 = 0.2±0.1 > 0.1±0.0 > + = + < 0.3±0.1 >             | 0.2±0.0 | 0.2±0.0 | 0.2±0.0 | 0.3±0.1 = 0.1±0.0 = 0.1±0.0 = |
| 18:2/17:0/18:2                  | 0.1±0.1 = 0.1±0.0 > 0.1±0.0 > + = + < 0.3±0.1 >             | 0.2±0.1 = 0.1±0.0 > 0.1±0.0 > + = + < 0.3±0.2 >             | 0.1±0.0 | 0.1±0.1 | 0.1±0.0 | 0.3±0.2 = 0.1±0.0 = 0.2±0.1 = |
| 16:1/17:1/18:1                  | 0.5±0.3 = 0.4±0.1 > 0.1±0.0 > 0.1±0.0 < 0.1±0.0 < 0.4±0.1 > | 0.3±0.1 = 0.4±0.1 > 0.1±0.0 > 0.1±0.0 = 0.1±0.0 < 0.4±0.2 > | 0.3±0.1 | 0.2±0.1 | 0.4±0.1 | 0.2±0.0 = 0.1±0.0 = 0.1±0.1 = |
| 16:0/18:0/18:2                  | 1.2±0.2 > 0.6±0.2 > 0.3±0.1 < 0.6±0.2 < 1.1±0.2 = 1.1±0.2 > | 0.9±0.2 = 0.7±0.2 > 0.4±0.0 = 0.6±0.2 = 0.7±0.2 = 0.9±0.2 = | 1.1±0.1 | 1.6±0.4 | 0.8±0.0 | 1.0±0.2 = 0.9±0.2 = 1.2±0.2 = |
| 16:0/18:0/18:3                  | 0.7±0.2 > 0.3±0.0 > 0.2±0.0 = 0.3±0.1 < 0.4±0.1 > 0.3±0.1 = | 0.5±0.0 > 0.3±0.1 > 0.2±0.0 = 0.2±0.0 = 0.2±0.1 < 0.3±0.1 > | 0.5±0.1 | 0.4±0.1 | 0.7±0.0 | 0.3±0.0 = 0.6±0.0 > 0.4±0.1 = |
| 16:0/24:0/18:0                  | 0.3±0.1 > 0.1±0.0 = 0.1±0.1 > + = + < 0.3±0.1 >             | 0.2±0.1 = 0.2±0.0 > 0.1±0.0 > + > + = 0.3±0.3 =             | 0.2±0.0 | 0.2±0.1 | 0.1±0.0 | 0.3±0.2 = 0.1±0.0 = 0.1±0.0 = |
| 18:0/16:1/24:0                  | 0.1±0.0 = 0.1±0.0 = 0.1±0.0 > + = + < 0.1±0.0 >             | + = + > + > + = + < 0.1±0.0 >                               | +       | 0.1±0.1 | 0.1±0.1 | 1.0±1.3 = + = 0.1±0.0 =       |
| 18:0/18:1/18:0 + 16:0/20:0/18:1 | 0.8±0.1 > 0.5±0.1 > 0.2±0.1 = 0.3±0.0 < 0.4±0.0 < 1.0±0.2 > | 0.7±0.0 > 0.5±0.1 > 0.3±0.0 = 0.4±0.0 = 0.3±0.1 < 0.7±0.0 > | 0.6±0.2 | 1.0±0.1 | 0.6±0.0 | 0.8±0.1 = 0.4±0.1 = 0.6±0.1 = |
| 18:1/18:0/18:2                  | 0.7±0.2 = 0.7±0.0 > 0.2±0.1 = 0.3±0.0 < 0.5±0.1 = 0.5±0.1 > | 0.5±0.1 = 0.6±0.2 > 0.3±0.0 < 0.4±0.0 = 0.4±0.1 = 0.4±0.1 = | 0.5±0.2 | 0.7±0.2 | 0.5±0.1 | 0.6±0.1 = 0.5±0.1 = 0.4±0.0 = |
| 18:0/18:1/20:4                  | 0.1±0.0 = 0.1±0.0 = + = + < 0.1±0.0 < 0.1±0.0 >             | 0.1±0.0 > + = + < 0.1±0.0 = 0.1±0.0 = 0.1±0.0 =             | +       | 0.1±0.0 | 0.1±0.0 | 0.1±0.0 = + = 0.1±0.0 >       |
| 18:0/18:1/20:5                  | 0.2±0.1 = 0.2±0.0 = 0.1±0.0 < 0.3±0.1 = 0.3±0.0 = 0.2±0.1 = | 0.2±0.1 > 0.1±0.0 < 0.3±0.1 < 0.4±0.1 = 0.3±0.1 = 0.2±0.1 < | 0.2±0.0 | 0.3±0.0 | 0.2±0.0 | 0.1±0.0 = 0.2±0.0 = 0.3±0.1 = |
| 18:0/18:2/20:5                  | 0.3±0.2 = 0.3±0.1 = 0.2±0.0 < 0.3±0.0 < 0.4±0.0 > 0.3±0.1 = | 0.3±0.1 > 0.2±0.0 < 0.3±0.0 = 0.4±0.1 = 0.4±0.1 = 0.3±0.1 = | 0.2±0.0 | 0.2±0.0 | 0.2±0.0 | 0.4±0.2 = 0.3±0.0 = 0.4±0.2 = |
| 18:3/18:0/20:5                  | 0.2±0.2 = 0.1±0.1 = 0.2±0.0 > 0.2±0.0 < 0.2±0.0 > 0.2±0.0 = | 0.2±0.0 > 0.1±0.0 < 0.2±0.0 > 0.2±0.0 = 0.2±0.0 < 0.3±0.0 > | 0.2±0.0 | 0.1±0.0 | 0.3±0.0 | 0.1±0.0 = 0.3±0.0 = 0.3±0.1 = |
| 20:4/18:1/20:4 + 20:4/18:0/20:5 | 0.1±0.0 = 0.1±0.1 = 0.1±0.0 > + < 0.1±0.0 < 0.3±0.1 >       | 0.1±0.0 > + = + = 0.1±0.0 = 0.1±0.0 < 0.2±0.1 >             | +       | 0.1±0.0 | +       | 0.3±0.1 = + = 0.2±0.1 =       |
| 18:1/16:1/18:1                  | 0.1±0.0 > 0.1±0.0 = 0.1±0.0 = 0.1±0.0 = 0.1±0.0 < 0.2±0.0 > | 0.1±0.1 = 0.1±0.0 = 0.1±0.0 = 0.1±0.0 > 0.1±0.0 = 0.1±0.1 = | 0.2±0.0 | 0.2±0.1 | 0.1±0.0 | 0.1±0.0 = 0.1±0.0 = 0.1±0.0 = |
| 16:0/18:2/18:3                  | 1.2±0.6 = 1.4±0.1 < 2.3±0.3 = 2.6±0.4 = 2.7±0.1 > 1.5±0.5 < | 1.3±0.2 = 1.2±0.2 < 1.9±0.2 = 2.1±0.1 = 2.1±0.2 > 0.9±0.2 < | 1.3±0.2 | 0.7±0.1 | 1.4±0.2 | 1.4±0.3 = 1.5±0.1 = 1.2±0.2 = |
| 16:1/22:0/18:1                  | 0.2±0.1 = 0.1±0.0 > + = + < 0.1±0.0 < 0.2±0.1 >             | 0.1±0.0 = 0.1±0.0 > + = + = + < 0.2±0.1 >                   | +       | 0.1±0.0 | 0.1±0.0 | 0.2±0.0 = + < 0.1±0.1 =       |
| 16:4/18:1/18:4                  | 0.1±0.0 = 0.1±0.0 = 0.1±0.0 > + = + < 0.1±0.0 =             | 0.1±0.0 = 0.1±0.0 = 0.1±0.0 > + < 0.1±0.0 = 0.1±0.1 =       | +       | +       | 0.1±0.0 | 0.1±0.0 = 0.1±0.1 = 0.2±0.0 = |
| 18:1/18:0/18:1                  | 1.3±0.4 > 0.6±0.1 > 0.3±0.1 = 0.2±0.0 < 0.3±0.0 < 0.6±0.1 > | 0.7±0.1 = 0.5±0.2 > 0.3±0.1 > 0.2±0.0 = 0.2±0.1 < 0.6±0.1 > | 1.0±0.2 | 1.5±0.2 | 0.8±0.1 | 0.4±0.1 = 0.5±0.0 = 0.5±0.3 = |
| 18:0/20:0/18:1 + 18:1/14:0/24:0 | 0.4±0.1 > 0.2±0.1 > 0.1±0.0 > 0.1±0.0 < 0.1±0.0 < 0.2±0.1 > | 0.3±0.1 = 0.2±0.0 > 0.1±0.0 > 0.1±0.0 > + < 0.3±0.1 >       | 0.2±0.1 | 0.3±0.1 | 0.3±0.0 | 0.3±0.3 = 0.1±0.0 = 0.2±0.1 = |
| 18:1/18:1/18:1                  | 4.4±1.2 = 2.5±1.3 > 0.9±0.2 = 0.6±0.2 = 2.0±1.9 = 0.8±0.0 = | 2.8±1.0 > 0.7±0.2 = 0.7±0.2 > 0.4±0.1 > 0.3±0.1 < 0.7±0.2 > | 2.8±0.8 | 1.1±0.3 | 2.7±0.9 | 0.6±0.2 = 1.3±0.0 = 0.6±0.2 = |
| 18:1/18:2/18:1                  | 2.7±0.7 = 1.9±0.8 > 0.8±0.2 = 0.7±0.2 < 0.9±0.0 > 0.7±0.1 = | 1.6±0.6 > 0.8±0.2 = 0.8±0.3 = 0.7±0.1 = 0.6±0.2 = 0.7±0.2 = | 1.8±0.4 | 0.8±0.2 | 1.6±0.4 | 0.7±0.3 = 0.9±0.0 = 0.5±0.1 = |
| 18:1/20:0/18:1                  | 0.3±0.0 > 0.2±0.1 > 0.1±0.0 = 0.1±0.0 < 0.1±0.0 = 0.1±0.0 = | 0.2±0.0 > 0.2±0.0 > 0.1±0.0 > 0.1±0.0 = 0.1±0.0 = 0.1±0.1 = | 0.2±0.1 | 0.2±0.1 | 0.2±0.0 | 0.5±0.4 = 0.1±0.0 < 0.2±0.1 = |
| 18:1/20:3/18:1                  | 0.2±0.1 > 0.1±0.0 > 0.1±0.0 < 0.1±0.0 < 0.2±0.0 > 0.1±0.0 = | 0.1±0.0 = 0.1±0.0 < 0.1±0.0 < 0.1±0.0 = 0.1±0.0 = 0.3±0.2 = | 0.2±0.0 | 0.2±0.0 | 0.2±0.0 | 0.2±0.0 = 0.1±0.0 = 0.1±0.0 = |

|                  |                                                             |                                                             |         |         |         |           |           |             |
|------------------|-------------------------------------------------------------|-------------------------------------------------------------|---------|---------|---------|-----------|-----------|-------------|
| 18:2/18:2/18:2 + | 1.6±0.2 = 1.5±0.2 > 1.1±0.2 = 1.7±0.5 = 1.6±0.1 > 0.7±0.3 < | 1.6±0.6= 1.1±0.3 = 1.4±0.5= 1.5±0.2 = 1.5±0.1 > 0.8±0.4 <   | 1.3±0.2 | 0.7±0.2 | 1.4±0.1 | 0.7±0.0 = | 0.9±0.1 = | 0.3±0.0 =   |
| 18:2/18:1/18:3   | 0.3±0.1 = 0.2±0.1 = 0.2±0.1 = 0.3±0.1 = 0.3±0.1 = 0.3±0.1 = | 0.3±0.2= 0.3±0.1 < 0.5±0.1= 0.8±0.3 > 0.5±0.1 > 0.1±0.0 <   | 0.2±0.1 | 0.1±0.1 | 0.3±0.1 | 0.3±0.0 = | 0.2±0.1 = | 0.2±0.0 =   |
| 18:2/18:1/18:4   | 0.2±0.1 = 0.2±0.1 = 0.1±0.0 < 0.2±0.0 = 0.3±0.0 = 0.3±0.1 = | 0.2±0.0 > 0.1±0.0 = 0.1±0.0 < 0.2±0.0 > 0.2±0.0 = 0.2±0.0 < | 0.1±0.0 | 0.2±0.0 | 0.2±0.0 | 0.2±0.0 = | 0.1±0.0 = | 0.2±0.0 =   |
| 18:1/18:1/20:4   | 0.1±0.1 < 0.4±0.1 = 0.3±0.1 = 0.3±0.1 = 0.3±0.0 < 0.8±0.4 > | 0.2±0.0 = 0.2±0.0 = 0.2±0.0 < 0.5±0.1 = 0.5±0.1 = 1.0±0.5 = | 0.1±0.0 | 0.4±0.3 | 0.1±0.0 | 1.1±0.4 = | 0.2±0.0 = | 1.0±0.4 =   |
| 20:4/18:1/20:5   | 0.4±0.2 < 0.7±0.1 = 0.6±0.2 < 1.3±0.1 > 1.0±0.0 > 0.6±0.3 < | 0.3±0.1 = 0.4±0.1 < 0.8±0.3 < 1.2±0.1 > 0.9±0.1 > 0.3±0.0 < | 0.4±0.0 | 0.5±0.1 | 0.4±0.0 | 0.5±0.1 = | 0.3±0.0 = | 0.4±0.1 =   |
| 18:1/18:1/20:5   | 0.6±0.3 < 1.0±0.1 = 0.9±0.1 < 2.4±0.2 > 1.7±0.0 > 1.1±0.1 < | 0.6±0.2 < 1.0±0.2 < 1.6±0.4 < 2.5±0.2 = 2.2±0.1 > 0.7±0.2 < | 0.4±0.0 | 0.5±0.2 | 0.6±0.1 | 0.9±0.3 = | 0.4±0.1 = | 0.8±0.0 =   |
| 18:2/18:1/20:5   | 0.3±0.2 < 0.6±0.1 = 0.7±0.2 < 1.4±0.5 > 0.3±0.1 = 0.4±0.2 < | 0.5±0.2 = 0.5±0.2 < 1.2±0.3 = 1.3±0.5 > 0.5±0.2 > 0.1±0.1 < | 0.3±0.0 | 0.3±0.0 | 0.5±0.1 | 0.4±0.1 = | 0.6±0.0 = | 0.3±0.1 =   |
| 18:3/18:1/20:5   | 0.6±0.4 = 0.4±0.1 = 0.5±0.0 < 0.7±0.1 = 0.7±0.1 = 0.5±0.2 = | 0.5±0.1 = 0.5±0.1 < 0.7±0.1 < 1.0±0.1 > 0.7±0.1 > 0.4±0.1 < | 0.4±0.1 | 0.4±0.1 | 0.6±0.1 | 0.7±0.2 = | 0.5±0.0 = | 0.6±0.3 =   |
| 18:4/18:1/20:5   | 0.1±0.0 = 0.1±0.0 = 0.1±0.0 < 0.1±0.0 < 0.1±0.0 = 0.2±0.0 > | 0.1±0.0 = 0.1±0.0 = 0.1±0.0 < 0.1±0.0 = 0.1±0.0 = 0.1±0.1 = | +       | 0.1±0.0 | 0.1±0.0 | 0.3±0.0 > | +         | = 0.2±0.2 = |
| 20:0/18:1/20:5   | 0.1±0.1 < 0.2±0.0 < 0.3±0.1 = 0.6±0.3 > 0.2±0.0 = 0.3±0.1 = | 0.2±0.1 = 0.3±0.1 < 0.5±0.1 = 0.6±0.1 = 0.6±0.2 > 0.3±0.0 < | 0.2±0.0 | 0.2±0.0 | 0.1±0.0 | 0.1±0.0 = | 0.2±0.0 = | 0.3±0.1 =   |
| 20:5/18:1/20:5   | 2.5±0.5 = 2.7±0.4 = 2.5±0.3 < 4.0±0.8 = 4.4±0.2 > 3.1±1.0 = | 2.4±0.3 = 2.2±0.2 < 2.8±0.2 < 3.8±0.2 = 3.2±0.5 > 1.9±0.6 < | 3.4±0.4 | 2.4±0.2 | 2.7±0.1 | 2.7±0.4 = | 2.7±0.1 = | 2.0±0.4 =   |
| 18:2/16:0/18:2   | 0.1±0.0 < 0.1±0.0 < 0.3±0.0 > 0.2±0.0 > 0.1±0.0 = 0.1±0.1 = | 0.1±0.0 < 0.2±0.0 = 0.2±0.1 > 0.2±0.0 = 0.2±0.0 > 0.1±0.1 < | +       | +       | 0.1±0.1 | 0.1±0.0 = | 0.1±0.0 = | 0.1±0.1 =   |
| 16:3/18:2/18:3   | +                                                           | 0.1±0.0 < 0.3±0.1 > 0.1±0.0 > 0.1±0.0 = 0.1±0.0 =           | +       | +       | 0.1±0.0 | 0.1±0.0 < | 0.1±0.0 = | 0.1±0.0 =   |
| 16:4/18:2/18:3   | 0.9±0.2 > 0.5±0.1 > 0.4±0.0 < 0.6±0.1 < 0.9±0.1 = 0.9±0.3 = | 0.8±0.1 > 0.5±0.1 = 0.5±0.1 < 0.7±0.1 = 0.7±0.2 = 0.6±0.0 = | 0.7±0.0 | 0.9±0.1 | 0.8±0.1 | 0.8±0.0 = | 0.6±0.0 = | 0.8±0.0 >   |
| 18:2/18:0/18:2   | 2.9±0.6 = 2.7±0.7 > 2.0±0.1 = 2.6±0.6 = 2.7±0.1 > 1.5±0.4 < | 2.0±0.4 > 1.5±0.2 < 2.1±0.4 = 2.1±0.1 = 1.7±0.3 = 1.5±0.3 < | 2.5±0.3 | 1.4±0.1 | 2.2±0.4 | 1.3±0.1 = | 1.6±0.1 = | 1.3±0.1 =   |
| 18:2/18:1/18:2   | 0.4±0.1 > 0.3±0.1 > 0.1±0.0 = 0.1±0.0 < 0.2±0.0 < 0.3±0.1 > | 0.3±0.0 > 0.2±0.0 > 0.1±0.0 < 0.2±0.0 = 0.2±0.0 = 0.2±0.1 = | 0.2±0.0 | 0.2±0.1 | 0.3±0.1 | 0.6±0.2 = | 0.1±0.0 < | 0.2±0.1 =   |
| 18:1/20:0/18:2 + | 0.2±0.1 > 0.1±0.0 = 0.1±0.0 < 0.3±0.1 < 0.4±0.0 > 0.3±0.0 = | 0.1±0.0 = 0.1±0.0 = 0.2±0.0 < 0.2±0.0 = 0.2±0.0 = 0.2±0.1 = | 0.2±0.0 | 0.2±0.0 | 0.2±0.0 | 0.3±0.0 = | 0.2±0.0 = | 0.2±0.1 =   |
| 18:1/18:2/20:3   | 0.3±0.0 > 0.1±0.0 = 0.1±0.0 < 0.3±0.1 < 0.4±0.0 > 0.3±0.0 = | 0.3±0.0 > 0.2±0.0 = 0.2±0.0 = 0.2±0.0 < 0.3±0.0 > 0.2±0.0 < | 0.1±0.1 | 0.2±0.0 | 0.2±0.1 | 0.3±0.1 = | 0.1±0.0 < | 0.2±0.0 =   |
| 18:2/18:1/20:1 + | 0.4±0.2 = 0.2±0.0 < 0.2±0.0 < 0.3±0.1 = 0.4±0.0 > 0.4±0.0 = | 0.4±0.1 > 0.2±0.0 < 0.3±0.1 = 0.3±0.1 < 0.5±0.1 > 0.3±0.1 = | 0.3±0.0 | 0.2±0.0 | 0.3±0.0 | 0.3±0.1 = | 0.5±0.0 = | 0.3±0.0 =   |
| 18:2/20:4/18:2   | 0.8±0.3 = 0.9±0.3 = 1.2±0.2 = 1.6±0.4 > 0.9±0.0 > 0.6±0.2 < | 1.0±0.1 > 0.8±0.1 < 1.3±0.1 = 1.3±0.1 = 1.4±0.1 > 0.6±0.2 < | 0.7±0.1 | 0.3±0.0 | 1.0±0.1 | 0.6±0.1 = | 0.8±0.1 = | 0.6±0.2 =   |
| 18:2/18:3/18:2   | 0.2±0.1 < 0.4±0.1 = 0.4±0.1 > 0.1±0.1 = 0.1±0.0 = 0.1±0.1 = | 0.3±0.0 = 0.3±0.1 = 0.3±0.0 > 0.1±0.0 = 0.1±0.1 = 0.2±0.0 > | 0.1±0.0 | +       | 0.2±0.0 | 0.2±0.0 = | 0.2±0.1 = | 0.1±0.1 =   |
| 18:3/18:2/18:4   | 0.2±0.1 = 0.1±0.1 = 0.1±0.0 < 0.2±0.0 < 0.3±0.0 = 0.2±0.1 = | 0.2±0.1 > 0.1±0.0 < 0.2±0.0 = 0.2±0.0 < 0.2±0.0 > 0.1±0.0 = | 0.1±0.0 | 0.1±0.0 | 0.2±0.0 | 0.2±0.1 = | 0.1±0.0 = | 0.1±0.0 =   |
| 18:2/18:3/20:0   | 0.2±0.1 = 0.1±0.0 < 0.2±0.0 = 0.2±0.0 = 0.2±0.0 = 0.1±0.0 = | 0.2±0.0 > 0.1±0.0 < 0.2±0.0 = 0.2±0.1 = 0.2±0.0 > 0.1±0.0 < | 0.1±0.0 | +       | 0.3±0.0 | 0.2±0.1 = | 0.2±0.1 = | 0.1±0.0 =   |
| 18:3/18:2/20:4   | 0.1±0.0 = 0.1±0.0 < 0.1±0.0 < 0.2±0.0 = 0.2±0.0 < 0.3±0.1 = | 0.1±0.0 = 0.1±0.0 = 0.1±0.0 < 0.2±0.0 = 0.2±0.0 = 0.2±0.1 = | 0.1±0.0 | 0.1±0.1 | 0.1±0.0 | 0.2±0.0 = | 0.1±0.0 < | 0.2±0.1 =   |
| 20:3/18:2/20:4 + | 0.2±0.1 < 0.5±0.1 = 0.6±0.1 < 0.9±0.2 > 0.7±0.0 = 0.7±0.3 = | 0.4±0.0 = 0.4±0.1 < 0.7±0.0 < 1.2±0.2 = 1.4±0.3 = 1.2±0.7 = | 0.2±0.0 | 0.5±0.4 | 0.2±0.1 | 1.1±0.2 = | 0.3±0.0 = | 1.3±0.2 =   |
| 20:3/18:1/20:5   | 0.5±0.4 < 1.4±0.2 = 1.9±0.5 < 2.8±0.6 = 2.4±0.1 > 1.1±0.2 < | 0.6±0.1 < 1.2±0.2 < 1.9±0.4 < 2.8±0.6 < 3.8±0.4 > 1.0±0.4 < | 0.3±0.0 | 0.4±0.3 | 0.6±0.0 | 0.9±0.3 = | 0.5±0.0 < | 0.9±0.0 =   |
| 20:4/18:2/20:5   | 0.9±0.5 < 2.5±0.1 < 3.3±0.4 = 3.4±0.3 > 2.0±0.1 > 1.0±0.4 < | 1.3±0.3 < 2.2±0.4 < 3.5±0.1 > 3.1±0.3 = 3.9±0.7 > 1.3±0.4 < | 0.5±0.1 | 0.6±0.4 | 1.2±0.1 | 0.6±0.1 = | 1.1±0.1 = | 1.4±0.5 =   |
| 18:3/18:2/20:5   | 0.7±0.4 = 0.8±0.2 < 1.3±0.2 = 1.1±0.4 = 0.9±0.1 = 1.2±0.3 = | 1.3±0.2 = 1.4±0.4 = 1.7±0.1 < 2.0±0.2 = 2.1±0.4 > 1.5±0.3 < | 0.6±0.1 | 0.7±0.4 | 0.9±0.1 | 1.3±0.1 = | 1.2±0.0 = | 1.6±0.7 =   |
| 18:2/18:4/20:5   | 0.1±0.0 > 0.1±0.0 = 0.1±0.0 = 0.1±0.0 < 0.2±0.0 = 0.2±0.1 = | 0.1±0.0 > 0.1±0.0 = 0.1±0.0 < 0.1±0.0 < 0.2±0.0 = 0.1±0.0 = | 0.1±0.0 | 0.1±0.0 | 0.1±0.0 | 0.2±0.1 = | 0.1±0.0 < | 0.2±0.1 =   |
| 20:0/18:2/20:5   | 0.2±0.1 = 0.1±0.0 < 0.3±0.1 < 0.5±0.1 > 0.4±0.0 > 0.2±0.1 < | 0.2±0.1 = 0.2±0.1 < 0.3±0.1 < 0.5±0.1 = 0.5±0.1 > 0.2±0.1 < | 0.2±0.0 | 0.1±0.1 | 0.2±0.0 | 0.3±0.0 = | 0.2±0.0 = | 0.2±0.1 =   |
| 20:3/18:2/20:5   | 0.2±0.1 = 0.2±0.0 < 0.3±0.0 < 0.4±0.1 = 0.3±0.0 = 0.3±0.1 < | 0.3±0.1 = 0.2±0.0 < 0.4±0.0 = 0.4±0.1 = 0.6±0.2 > 0.2±0.0 < | 0.1±0.0 | 0.1±0.1 | 0.3±0.0 | 0.2±0.1 = | 0.3±0.0 = | 0.2±0.1 =   |
| 20:4/18:2/20:5   | 0.8±0.4 < 1.5±0.0 < 2.3±0.2 = 2.7±0.6 > 1.6±0.1 > 1.3±0.0 < | 0.9±0.2 < 1.4±0.3 < 2.4±0.1 < 2.7±0.1 = 3.4±0.9 > 1.9±0.8 = | 0.5±0.0 | 1.0±0.7 | 1.1±0.1 | 1.2±0.1 = | 1.1±0.0 = | 1.8±0.4 =   |
| 20:5/18:2/20:5   | 0.1±0.0 > 0.1±0.0 = 0.1±0.0 > + < + < 0.1±0.1 >             | 0.1±0.0 = 0.1±0.0 = + > + < + = 0.2±0.2 =                   | +       | 0.1±0.0 | 0.1±0.0 | 0.3±0.0 = | +         | = 0.1±0.1 = |
| 18:2/18:2/22:0 + | 0.4±0.0 > 0.2±0.0 > 0.1±0.0 = 0.1±0.0 = 0.2±0.0 = 0.2±0.1 = | 0.3±0.0 > 0.1±0.0 = 0.1±0.0 > 0.1±0.0 = 0.1±0.0 < 0.2±0.0 > | 0.1±0.0 | 0.1±0.0 | 0.3±0.0 | 0.1±0.0 = | 0.2±0.0 < | 0.2±0.1 =   |
| 20:0/18:0/20:4   | 0.2±0.1 < 0.4±0.1 = 0.4±0.1 > 0.1±0.1 = 0.1±0.0 = 0.1±0.1 = | 0.3±0.0 = 0.3±0.1 = 0.3±0.0 > 0.1±0.0 = 0.1±0.1 = 0.2±0.0 > | 0.1±0.0 | +       | 0.2±0.0 | 0.2±0.0 = | 0.2±0.1 = | 0.1±0.1 =   |
| 18:3/18:3/18:3   | 0.3±0.1 = 0.5±0.1 = 0.6±0.2 > 0.2±0.1 = 0.2±0.0 < 0.5±0.1 > | 0.6±0.1 = 0.7±0.1 = 0.8±0.1 > 0.5±0.1 = 0.4±0.1 = 0.5±0.1 = | 0.3±0.0 | 0.3±0.1 | 0.5±0.1 | 0.4±0.1 = | 0.5±0.0 = | 0.4±0.3 =   |
| 18:3/18:4/18:3   | 0.1±0.0 = 0.1±0.0 = 0.1±0.0 = 0.1±0.0 = 0.1±0.0 = 0.1±0.0 = | 0.1±0.0 = 0.1±0.0 = 0.1±0.0 > 0.1±0.0 < 0.2±0.0 = 0.1±0.1 = | 0.1±0.0 | 0.1±0.0 | +       | 0.2±0.2 = | 0.2±0.0 = | 0.1±0.1 =   |
| 18:3/18:3/18:4   | 0.1±0.0 < 0.4±0.1 < 0.7±0.0 > 0.4±0.2 > 0.2±0.0 = 0.3±0.1 = | 0.4±0.1 < 0.6±0.1 = 0.7±0.1 > 0.5±0.1 = 0.6±0.1 > 0.4±0.1 = | 0.2±0.1 | 0.2±0.1 | 0.3±0.0 | 0.5±0.1 = | 0.5±0.0 = | 0.5±0.1 =   |
| 18:4/18:3/18:4 + | 0.5±0.3 < 1.5±0.0 < 2.3±0.1 > 0.9±0.1 > 0.7±0.1 > 0.3±0.2 < | 0.9±0.2 < 1.3±0.2 < 1.9±0.2 > 0.6±0.2 < 1.0±0.2 > 0.5±0.1 = | 0.4±0.1 | 0.3±0.2 | 0.7±0.0 | 0.3±0.1 = | 0.9±0.0 = | 0.6±0.0 =   |
| 18:4/16:2/20:5   |                                                             |                                                             |         |         |         |           |           |             |
| 18:3/18:3/20:5   |                                                             |                                                             |         |         |         |           |           |             |

|                                 |                                                             |                                                             |         |         |         |         |             |           |
|---------------------------------|-------------------------------------------------------------|-------------------------------------------------------------|---------|---------|---------|---------|-------------|-----------|
| 18:4/18:3/20:5                  | 0.9±0.6 = 1.7±0.4 < 3.1±0.2 > 1.6±0.5 = 1.5±0.1 > 1.2±0.2 = | 2.6±0.4 = 3.3±0.5 = 3.7±0.4 > 2.5±0.4 = 2.8±0.5 > 1.7±0.4 < | 1.3±0.2 | 1.1±0.6 | 1.5±0.0 | 1.2±0.4 | = 2.7±0.0 = | 1.9±0.4 = |
| 18:3/20:5/20:4                  | 0.1±0.0 < 0.1±0.0 = 0.1±0.0 > 0.1±0.0 = 0.1±0.0 = 0.1±0.0 = | 0.2±0.1 = 0.1±0.1 = 0.1±0.0 = 0.2±0.0 = 0.1±0.1 = 0.2±0.1 = | 0.1±0.0 | 0.1±0.0 | 0.1±0.0 | 0.1±0.1 | = 0.2±0.0 = | 0.2±0.1 = |
| 18:4/20:0/20:4 + 18:3/20:0/20:5 | 0.1±0.1 = 0.1±0.0 = 0.1±0.0 = 0.1±0.0 < 0.1±0.0 < 0.3±0.1 > | 0.2±0.1 > 0.1±0.0 = 0.1±0.0 = 0.1±0.0 = 0.1±0.0 < 0.3±0.1 > | 0.1±0.0 | 0.2±0.0 | 0.1±0.0 | 0.5±0.1 | = 0.1±0.0 = | 0.4±0.0 = |
| 18:4/20:0/20:5                  | 0.1±0.1 = 0.1±0.0 = 0.1±0.0 = 0.1±0.0 < 0.2±0.0 = 0.2±0.1 > | 0.3±0.0 > 0.1±0.0 = 0.1±0.0 = 0.2±0.0 < 0.2±0.0 = 0.3±0.1 > | 0.1±0.0 | 0.2±0.0 | 0.2±0.0 | 0.2±0.0 | = 0.3±0.0 = | 0.3±0.0 = |
| 18:4/20:4/20:5                  | 0.3±0.2 = 0.2±0.0 = 0.2±0.0 = 0.1±0.1 = 0.2±0.0 = 0.2±0.1 = | 0.6±0.1 > 0.2±0.1 = 0.2±0.1 = 0.2±0.1 = 0.2±0.1 < 0.4±0.1 > | 0.3±0.0 | 0.3±0.1 | 0.4±0.1 | 0.3±0.1 | = 0.7±0.0 = | 0.5±0.2 = |
| 20:4/18:4/20:5                  | 0.9±0.4 < 2.4±0.1 < 3.3±0.1 > 2.3±0.6 = 1.6±0.2 > 1.1±0.3 < | 1.6±0.3 < 2.5±0.4 < 3.2±0.2 > 2.7±0.1 < 3.5±0.6 > 2.2±0.7 = | 0.7±0.2 | 1.3±0.9 | 1.2±0.1 | 1.0±0.2 | = 1.9±0.1 = | 1.7±0.1 = |
| 20:5/18:4/20:5                  | 0.9±0.6 < 2.6±0.4 < 5.2±0.2 > 3.5±1.4 = 2.3±0.2 > 0.7±0.2 < | 2.3±0.6 < 4.9±1.3 = 6.3±0.7 > 4.6±0.6 = 5.1±0.6 > 1.5±0.4 < | 1.5±0.4 | 1.4±0.9 | 1.4±0.1 | 0.5±0.1 | = 3.5±0.5 = | 1.3±0.3 = |
| 20:4/20:3/20:4                  | + = + = 0.1±0.0 > + < + < 0.2±0.1 >                         | + = + = + = + < + < 0.1±0.1 >                               | +       | 0.1±0.0 | +       | 0.3±0.1 | = + =       | 0.2±0.0 = |
| 20:4/20:3/20:5                  | 0.1±0.0 = 0.1±0.1 = 0.1±0.0 = 0.1±0.0 = 0.1±0.0 < 0.2±0.1 = | 0.1±0.0 = + < 0.1±0.0 < 0.1±0.0 = 0.2±0.0 = 0.3±0.1 >       | 0.1±0.0 | 0.1±0.1 | +       | 0.2±0.0 | = 0.1±0.0 = | 0.2±0.0 = |
| 20:4/20:4/20:4                  | 0.1±0.0 < 0.3±0.1 = 0.2±0.1 > 0.1±0.0 < 0.1±0.0 < 0.9±0.7 > | 0.1±0.0 = 0.2±0.1 = 0.2±0.1 > 0.1±0.0 = 0.1±0.0 < 1.3±0.7 > | 0.1±0.1 | 0.3±0.2 | 0.1±0.0 | 1.1±0.5 | = 0.1±0.0 = | 1.2±0.4 = |
| 20:4/20:5/20:4                  | 0.1±0.0 < 0.5±0.1 = 0.6±0.2 = 0.3±0.1 = 0.3±0.0 = 0.4±0.2 = | 0.2±0.0 < 0.4±0.2 = 0.5±0.0 = 0.6±0.1 = 0.7±0.2 = 1.1±0.5 = | 0.1±0.0 | 0.5±0.3 | 0.1±0.0 | 0.5±0.1 | = 0.2±0.0 = | 1.1±0.3 = |
| 20:4/20:4/20:5                  | + < 0.1±0.0 = 0.1±0.0 = 0.1±0.1 = 0.1±0.0 = + =             | 0.1±0.0 = 0.1±0.0 < 0.1±0.0 < 0.2±0.0 = 0.3±0.1 = 0.1±0.0 < | 0.1±0.0 | 0.1±0.1 | +       | 0.2±0.1 | = 0.1±0.0 = | 0.1±0.0 = |
| 20:5/20:4/20:5                  | + = + = + = + = + < + =                                     | 0.1±0.0 = + = 0.1±0.0 = 0.1±0.0 = 0.1±0.1 > 0.1±0.0 =       | 0.1±0.0 | 0.1±0.0 | +       | 0.1±0.0 | = 0.1±0.0 = | 0.1±0.0 = |
| 18:0/20:5/20:5                  | 0.1±0.0 = + = + = + < + < 0.1±0.1 >                         | + = + = + = + < + = 0.1±0.1 =                               | 0.1±0.0 | 0.1±0.0 | 0.1±0.1 | 0.2±0.2 | = 0.1±0.0 = | 0.1±0.0 = |
| 20:4/20:5/20:5                  | 0.1±0.0 < 0.5±0.1 = 0.7±0.1 > 0.4±0.2 = 0.3±0.0 > 0.2±0.1 = | 0.2±0.1 = 0.3±0.1 < 0.6±0.0 < 0.7±0.0 = 1.0±0.3 > 0.5±0.2 < | 0.2±0.0 | 0.4±0.2 | 0.1±0.0 | 0.2±0.1 | = 0.3±0.1 = | 0.5±0.2 = |
| 20:5/20:5/20:5                  | 0.1±0.0 < 0.2±0.0 < 0.3±0.0 > 0.1±0.1 = 0.1±0.0 = 0.3±0.2 = | 0.1±0.0 < 0.2±0.1 = 0.3±0.0 > 0.2±0.1 = 0.3±0.1 = 0.2±0.0 = | 0.1±0.0 | 0.2±0.1 | 0.1±0.0 | 0.2±0.0 | = 0.2±0.0 = | 0.2±0.1 = |

**Table S4.** The plastid-derived lipid molecular species of MGDG, DGDG, SQDG, PG, PE, PC, PI and TAG of various parts of the blades of *Undaria pinnatifida* samples uninfected and infected with the endophyte *Laminariocolax aecidioides* collected in different months. Values given as % of total molecular species (mean ± s.d. for triplicate). “+” – amount less than 0.1%, “-” – not detected. Between columns result of Tukey test and Students t-test (p<0.05, n=3) are shown (“>”, “<” – statistically significant difference, “=” – no significant changes). “T” – difference between «June» and «February», «S» – difference between uninfected and infected samples.

| Lipid | The lower part of the blades of infected <i>U. pinnatifida</i> samples |            |            |            |            |            |   | The upper intact part of the blades of infected <i>U. pinnatifida</i> samples |            |            |            |            |            |   | The lower part of the blades of uninfected <i>U. pinnatifida</i> samples |          | The lower part of the blades of uninfected <i>U. pinnatifida</i> samples |            |      | The upper part of the blades of uninfected <i>U. pinnatifida</i> samples |            |   |      |   |
|-------|------------------------------------------------------------------------|------------|------------|------------|------------|------------|---|-------------------------------------------------------------------------------|------------|------------|------------|------------|------------|---|--------------------------------------------------------------------------|----------|--------------------------------------------------------------------------|------------|------|--------------------------------------------------------------------------|------------|---|------|---|
|       | Nov.                                                                   | Dec.       | Jan.       | Feb.       | Apr.       | Jun.       | T | Nov.                                                                          | Dec.       | Jan.       | Feb.       | Apr.       | Jun.       | T | Nov.                                                                     | Jun.     | Nov.                                                                     | S          | Jun. | S                                                                        | Nov.       | S | Jun. | S |
| MGDG  | 0.8±0.1                                                                | = 0.9±0.2  | = 0.8±0.3  | = 1.0±0.2  | = 0.8±0.2  | < 1.3±0.2  | = | 1.2±0.6                                                                       | < 2.4±0.8  | > 0.8±0.1  | < 1.3±0.3  | > 0.8±0.0  | = 1.1±0.3  | = | 2.6±1.1                                                                  | 1.9±0.3  | 1.2±0.0                                                                  | > 1.3±0.4  | =    | 3.7±0.1                                                                  | > 1.0±0.0  | = |      |   |
| DGDG  | 1.1±0.4                                                                | > 0.4±0.2  | = 0.8±0.3  | = 1.2±0.2  | > 0.7±0.2  | < 2.2±0.8  | > | 1.7±0.8                                                                       | = 1.0±0.3  | = 1.0±0.1  | = 1.9±1.5  | = 1.3±0.3  | = 3.1±1.9  | = | 2.2±1.4                                                                  | 3.2±1.7  | 1.1±0.0                                                                  | = 2.3±0.1  | =    | 2.2±0.1                                                                  | = 1.7±0.5  | = |      |   |
| SQDG  | 80.3±2.0                                                               | = 78.8±3.4 | = 82.6±1.0 | = 82.8±1.2 | < 86.0±1.1 | > 80.9±2.0 | = | 78.0±1.9                                                                      | > 74.1±2.1 | = 77.1±1.9 | < 83.1±1.8 | = 83.0±1.2 | > 77.1±2.7 | < | 79.2±2.0                                                                 | 79.3±1.7 | 81.0±1.6                                                                 | = 82.1±5.0 | =    | 76.9±0.2                                                                 | = 74.0±0.3 | = |      |   |
| PG    | 39.7±2.7                                                               | = 42.5±2.9 | < 47.9±2.8 | = 48.0±4.3 | > 38.4±0.6 | < 44.4±4.5 | = | 52.5±0.8                                                                      | > 48.9±1.2 | < 53.5±3.1 | < 60.3±1.3 | > 54.4±2.9 | = 48.5±6.0 | < | 46.5±2.9                                                                 | 44.2±2.7 | 41.1±1.8                                                                 | = 44.2±3.0 | =    | 52.0±2.8                                                                 | = 53.1±1.1 | = |      |   |
| PE    | 0.8±0.2                                                                | = 0.8±0.1  | = 0.9±0.3  | = 0.8±0.1  | = 0.7±0.1  | > 0.3±0.1  | < | 0.7±0.1                                                                       | = 1.0±0.4  | = 0.7±0.1  | < 1.8±0.7  | > 0.9±0.3  | = 1.4±0.7  | = | 1.8±0.4                                                                  | 3.2±2.5  | 1.1±0.2                                                                  | = 0.3±0.0  | =    | 2.0±0.1                                                                  | > 1.1±0.9  | = |      |   |
| PC    | 1.1±0.0                                                                | > 0.8±0.2  | = 0.7±0.1  | > 0.5±0.0  | < 0.8±0.1  | = 1.1±0.3  | > | 0.8±0.1                                                                       | = 0.7±0.2  | = 0.5±0.1  | = 0.6±0.1  | = 0.5±0.1  | < 0.9±0.2  | > | 0.9±0.1                                                                  | 0.8±0.4  | 1.5±0.3                                                                  | = 1.4±0.1  | =    | 0.9±0.1                                                                  | = 0.9±0.2  | = |      |   |
| PI    | 1.6±1.2                                                                | = 1.5±1.4  | = 1.2±1.2  | = 0.8±0.4  | = 1.3±1.5  | = 2.4±1.2  | > | 1.5±0.2                                                                       | > 0.4±0.8  | = 1.7±1.0  | = 2.6±2.8  | = 1.4±0.3  | > 0.2±0.3  | = | 1.3±0.6                                                                  | 1.7±1.2  | 0.7±1.0                                                                  | = +        | =    | 1.9±1.8                                                                  | = 2.3±3.2  | = |      |   |
| TAG   | 38.3±4.5                                                               | = 34.0±2.2 | > 28.7±0.5 | = 28.8±3.1 | < 33.0±1.6 | < 38.0±1.1 | > | 35.1±1.9                                                                      | = 34.2±3.0 | > 26.2±0.5 | = 26.5±1.0 | = 23.9±2.3 | < 34.4±2.8 | > | 46.5±2.9                                                                 | 44.2±2.7 | 41.1±1.8                                                                 | = 44.2±3.0 | =    | 52.0±2.8                                                                 | = 53.1±1.1 | = |      |   |
